# Supplementary material for: Versiquinazolines L–Q, new polycyclic alkaloids from the marine-derived fungus Aspergillus versicolor
Source: Royal Society of Chemistry journal article supplement (doi:10.1039/c8ra06854b), 2018-01-01
Supplement: c8ra06854b1.pdf [file c8ra06854b1.pdf]

Versiquinazolines L–Q, new polycyclic alkaloids from the  
marine-derived fungus *Aspergillus versicolor*

**Supporting Information**

Figure S1 UV spectrum of **1**  
Figure S2 IR Spectrum of **1**  
Figure S3  $^1\text{H}$  NMR Spectrum of **1** in  $\text{DMSO-}d_6$   
Figure S4 DEPTQ Spectrum of **1** in  $\text{DMSO-}d_6$   
Figure S5 HSQC Spectrum of **1** in  $\text{DMSO-}d_6$   
Figure S6  $^1\text{H-}^1\text{H}$  COSY Spectrum of **1**  
Figure S7 HMBC Spectrum of **1** in  $\text{DMSO-}d_6$   
Figure S8 NOESY Spectrum of **1** in  $\text{DMSO-}d_6$   
Figure S9 HRESIMS Data of **1**  
Figure S10 UV spectrum of **2**  
Figure S11 IR Spectrum of **2**  
Figure S12  $^1\text{H}$  NMR Spectrum of **2** in  $\text{DMSO-}d_6$   
Figure S13 DEPTQ Spectrum of **2** in  $\text{DMSO-}d_6$   
Figure S14 HSQC Spectrum of **2** in  $\text{DMSO-}d_6$   
Figure S15  $^1\text{H-}^1\text{H}$  COSY Spectrum of **2**  
Figure S16 HMBC Spectrum of **2** in  $\text{DMSO-}d_6$   
Figure S17 NOESY Spectrum of **2** in  $\text{DMSO-}d_6$   
Figure S18 HRESIMS Data of **2**  
Figure S19 UV spectrum of **3**  
Figure S20 IR Spectrum of **3**  
Figure S21  $^1\text{H}$  NMR Spectrum of **3** in  $\text{DMSO-}d_6$   
Figure S22 DEPTQ Spectrum of **3** in  $\text{DMSO-}d_6$   
Figure S23 HSQC Spectrum of **3** in  $\text{DMSO-}d_6$   
Figure S24  $^1\text{H-}^1\text{H}$  COSY Spectrum of **3**  
Figure S25 HMBC Spectrum of **3** in  $\text{DMSO-}d_6$   
Figure S26 NOESY Spectrum of **3** in  $\text{DMSO-}d_6$   
Figure S27 HRESIMS Data of **3**  
Figure S28 UV spectrum of **4**  
Figure S29 IR Spectrum of **4**  
Figure S30  $^1\text{H}$  NMR Spectrum of **4** in  $\text{DMSO-}d_6$   
Figure S31  $^{13}\text{C}$  NMR Spectrum of **4** in  $\text{DMSO-}d_6$   
Figure S32 HSQC Spectrum of **4** in  $\text{DMSO-}d_6$   
Figure S33  $^1\text{H-}^1\text{H}$  COSY Spectrum of **4**  
Figure S34 HMBC Spectrum of **4** in  $\text{DMSO-}d_6$   
Figure S35 NOESY Spectrum of **4** in  $\text{DMSO-}d_6$   
Figure S36 HRESIMS Data of **4**  
Figure S37 UV spectrum of **5**  
Figure S38 IR Spectrum of **5**  
Figure S39  $^1\text{H}$  NMR Spectrum of **5** in  $\text{DMSO-}d_6$   
Figure S40  $^{13}\text{C}$  NMR Spectrum of **5** in  $\text{DMSO-}d_6$   
Figure S41 HSQC Spectrum of **5** in  $\text{DMSO-}d_6$   
Figure S42  $^1\text{H-}^1\text{H}$  COSY Spectrum of **5**  
Figure S43 HMBC Spectrum of **5** in  $\text{DMSO-}d_6$   
Figure S44 NOESY Spectrum of **5** in  $\text{DMSO-}d_6$   
Figure S45 HRESIMS Data of **5**  
Figure S46 UV spectrum of **6**  
Figure S47 IR Spectrum of **6**  
Figure S48  $^1\text{H}$  NMR Spectrum of **6** in  $\text{DMSO-}d_6$   
Figure S49 DEPTQ Spectrum of **6** in  $\text{DMSO-}d_6$   
Figure S50 HSQC Spectrum of **6** in  $\text{DMSO-}d_6$   
Figure S51  $^1\text{H-}^1\text{H}$  COSY Spectrum of **6**  
Figure S52 HMBC Spectrum of **6** in  $\text{DMSO-}d_6$   
Figure S53 NOESY Spectrum of **6** in  $\text{DMSO-}d_6$   
Figure S54 HRESIMS Data of **6**  
Tables S1-S6 X-Ray data of **1**  
Computational Details

Figure S1 UV spectrum of **1**

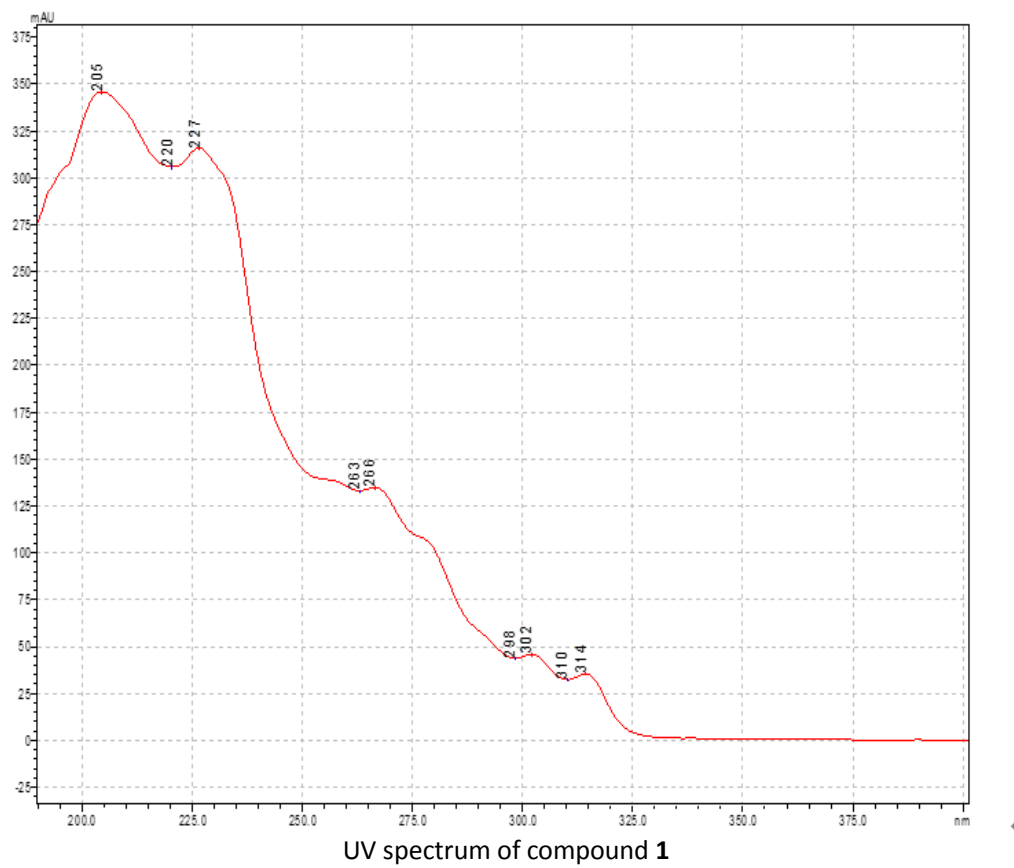

Figure S2 IR Spectrum of 1

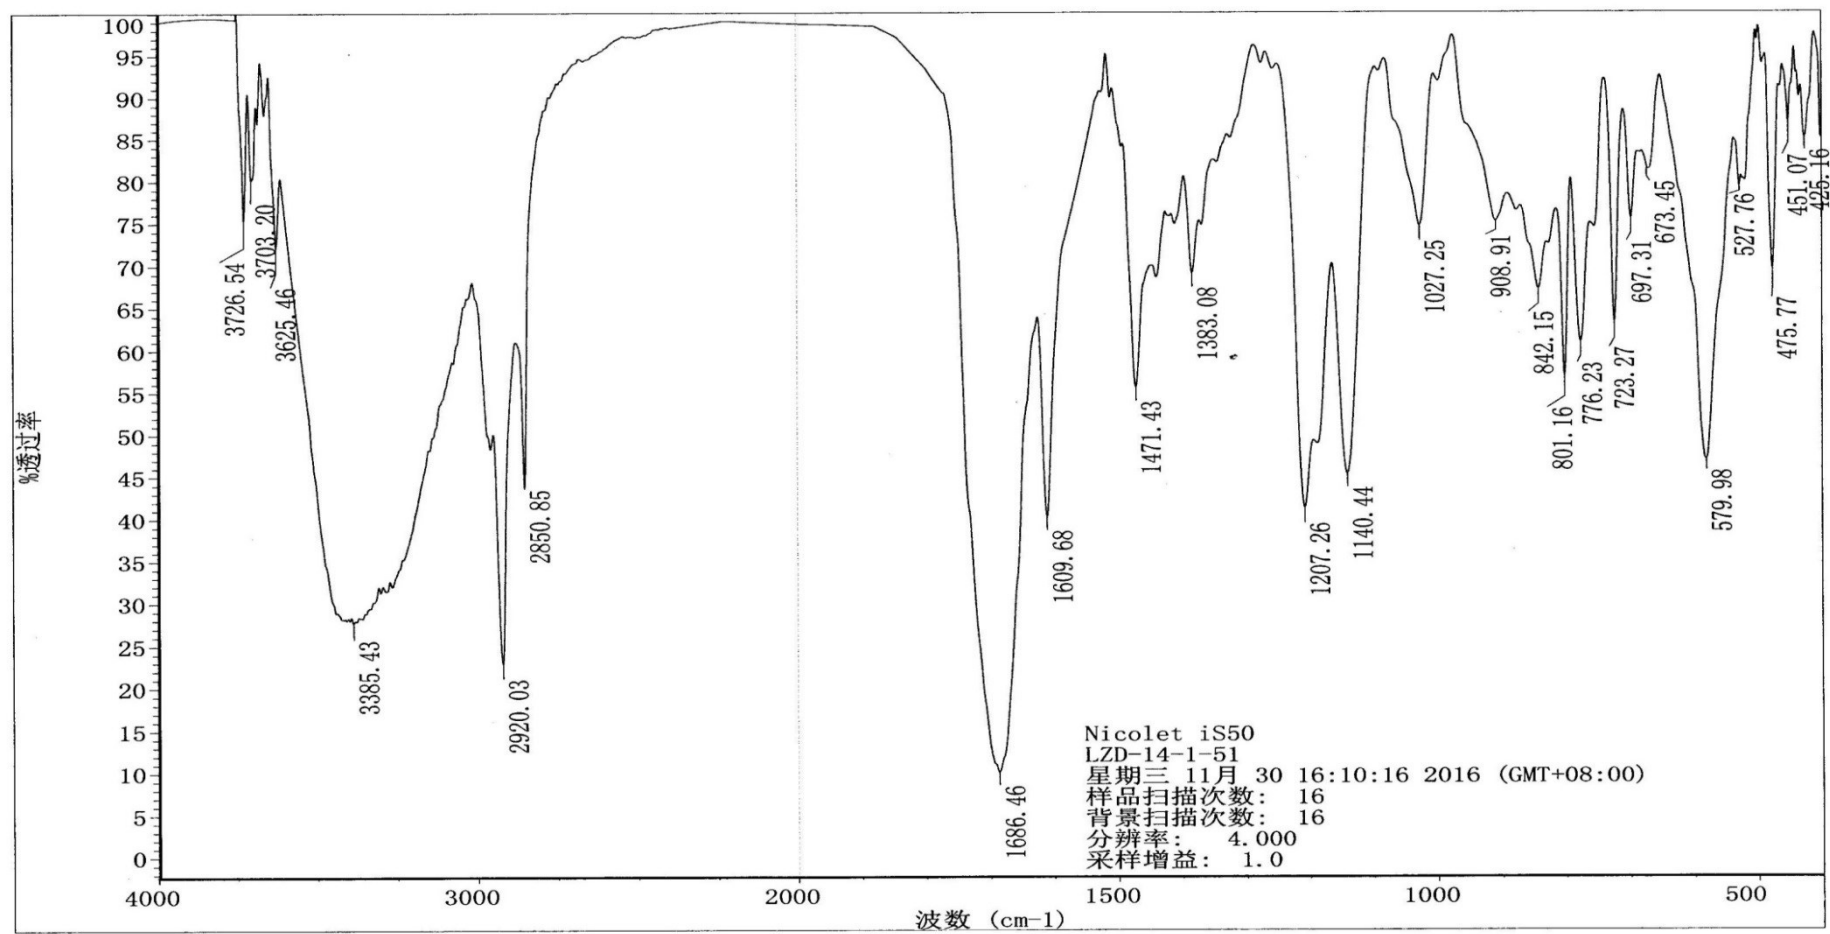

**Figure S3**  $^1\text{H}$  NMR Spectrum of **1** in  $\text{DMSO-}d_6$

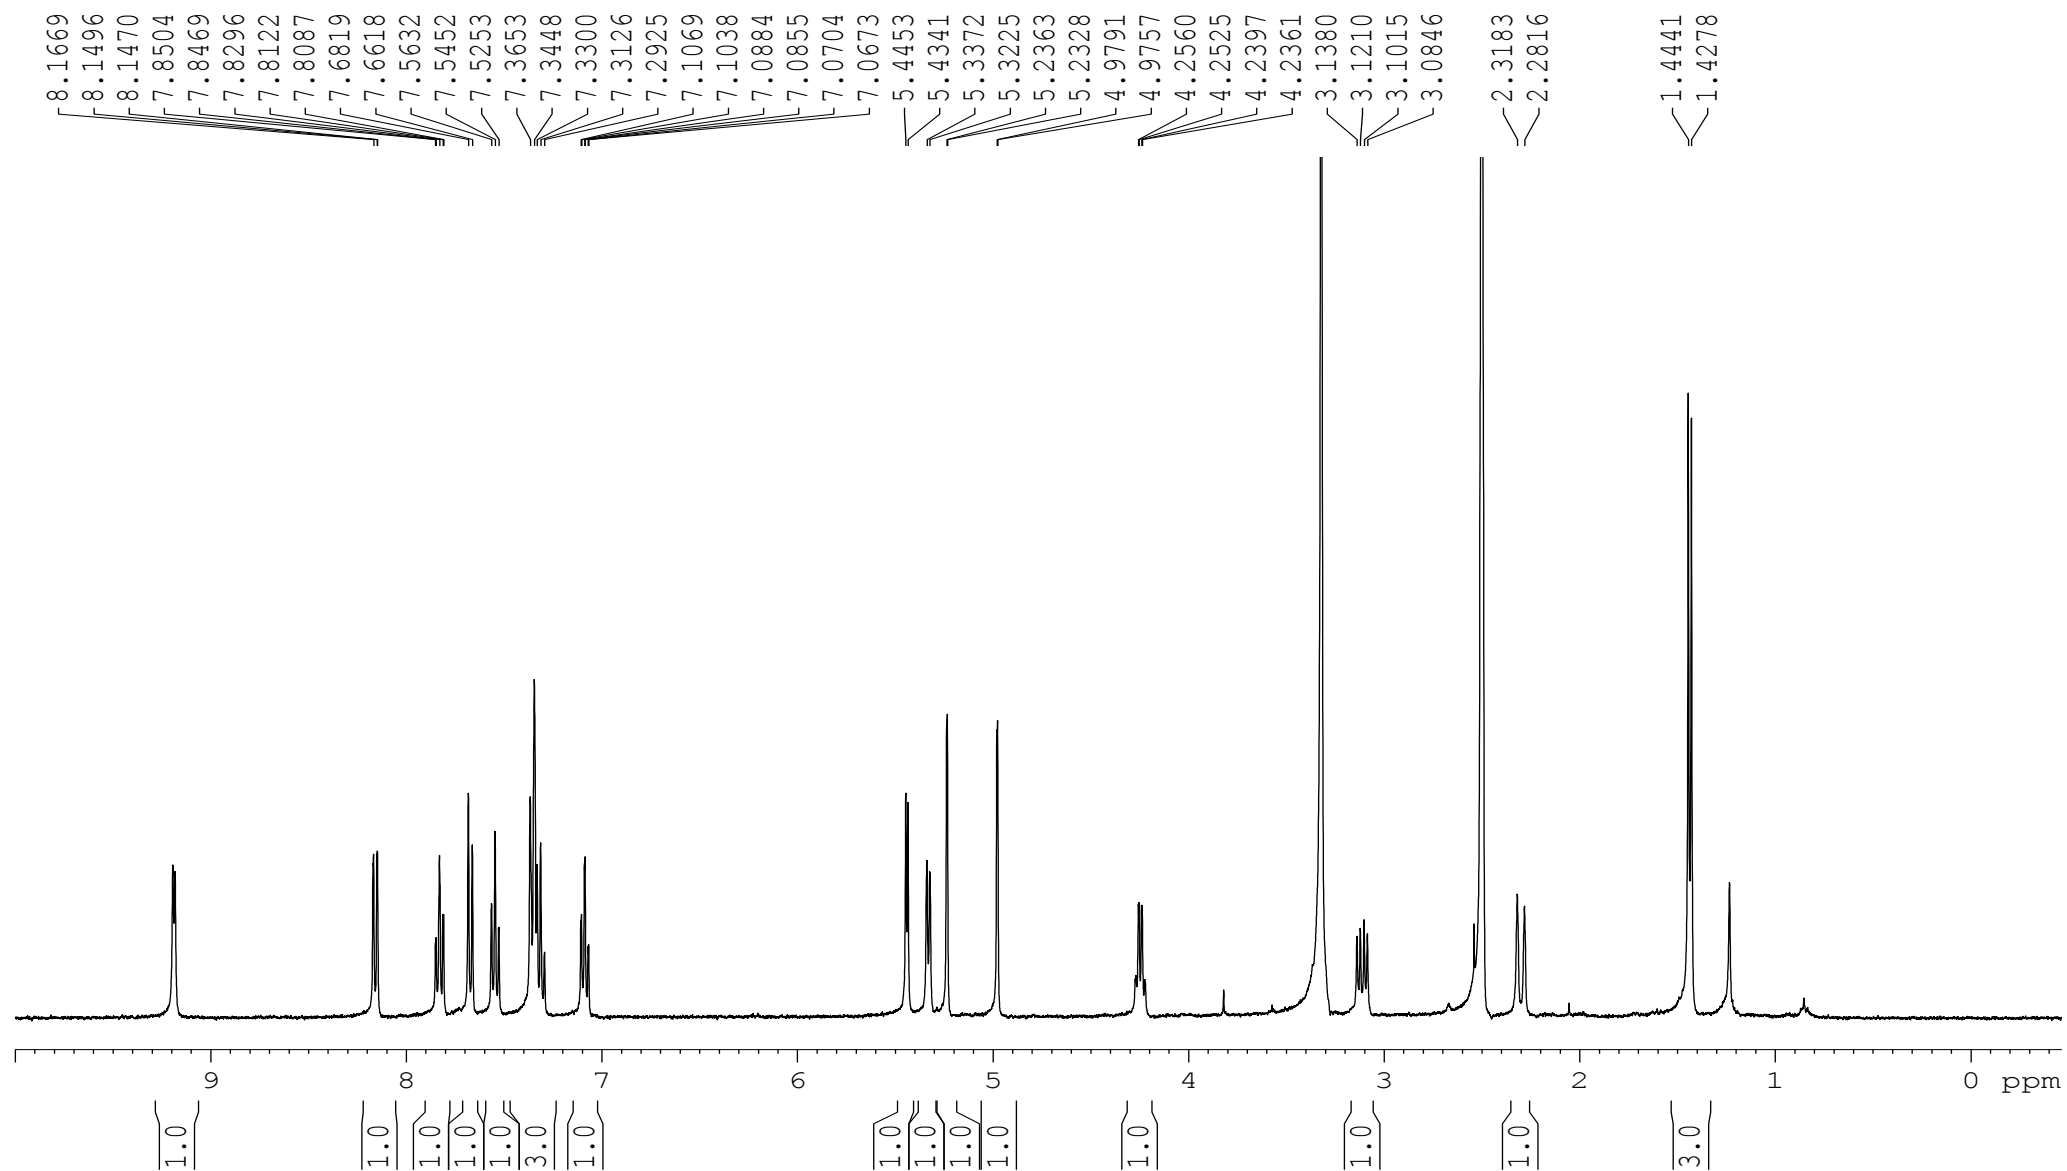

**Figure S4**

DEPTQ Spectrum of **1** in DMSO-*d*<sub>6</sub>

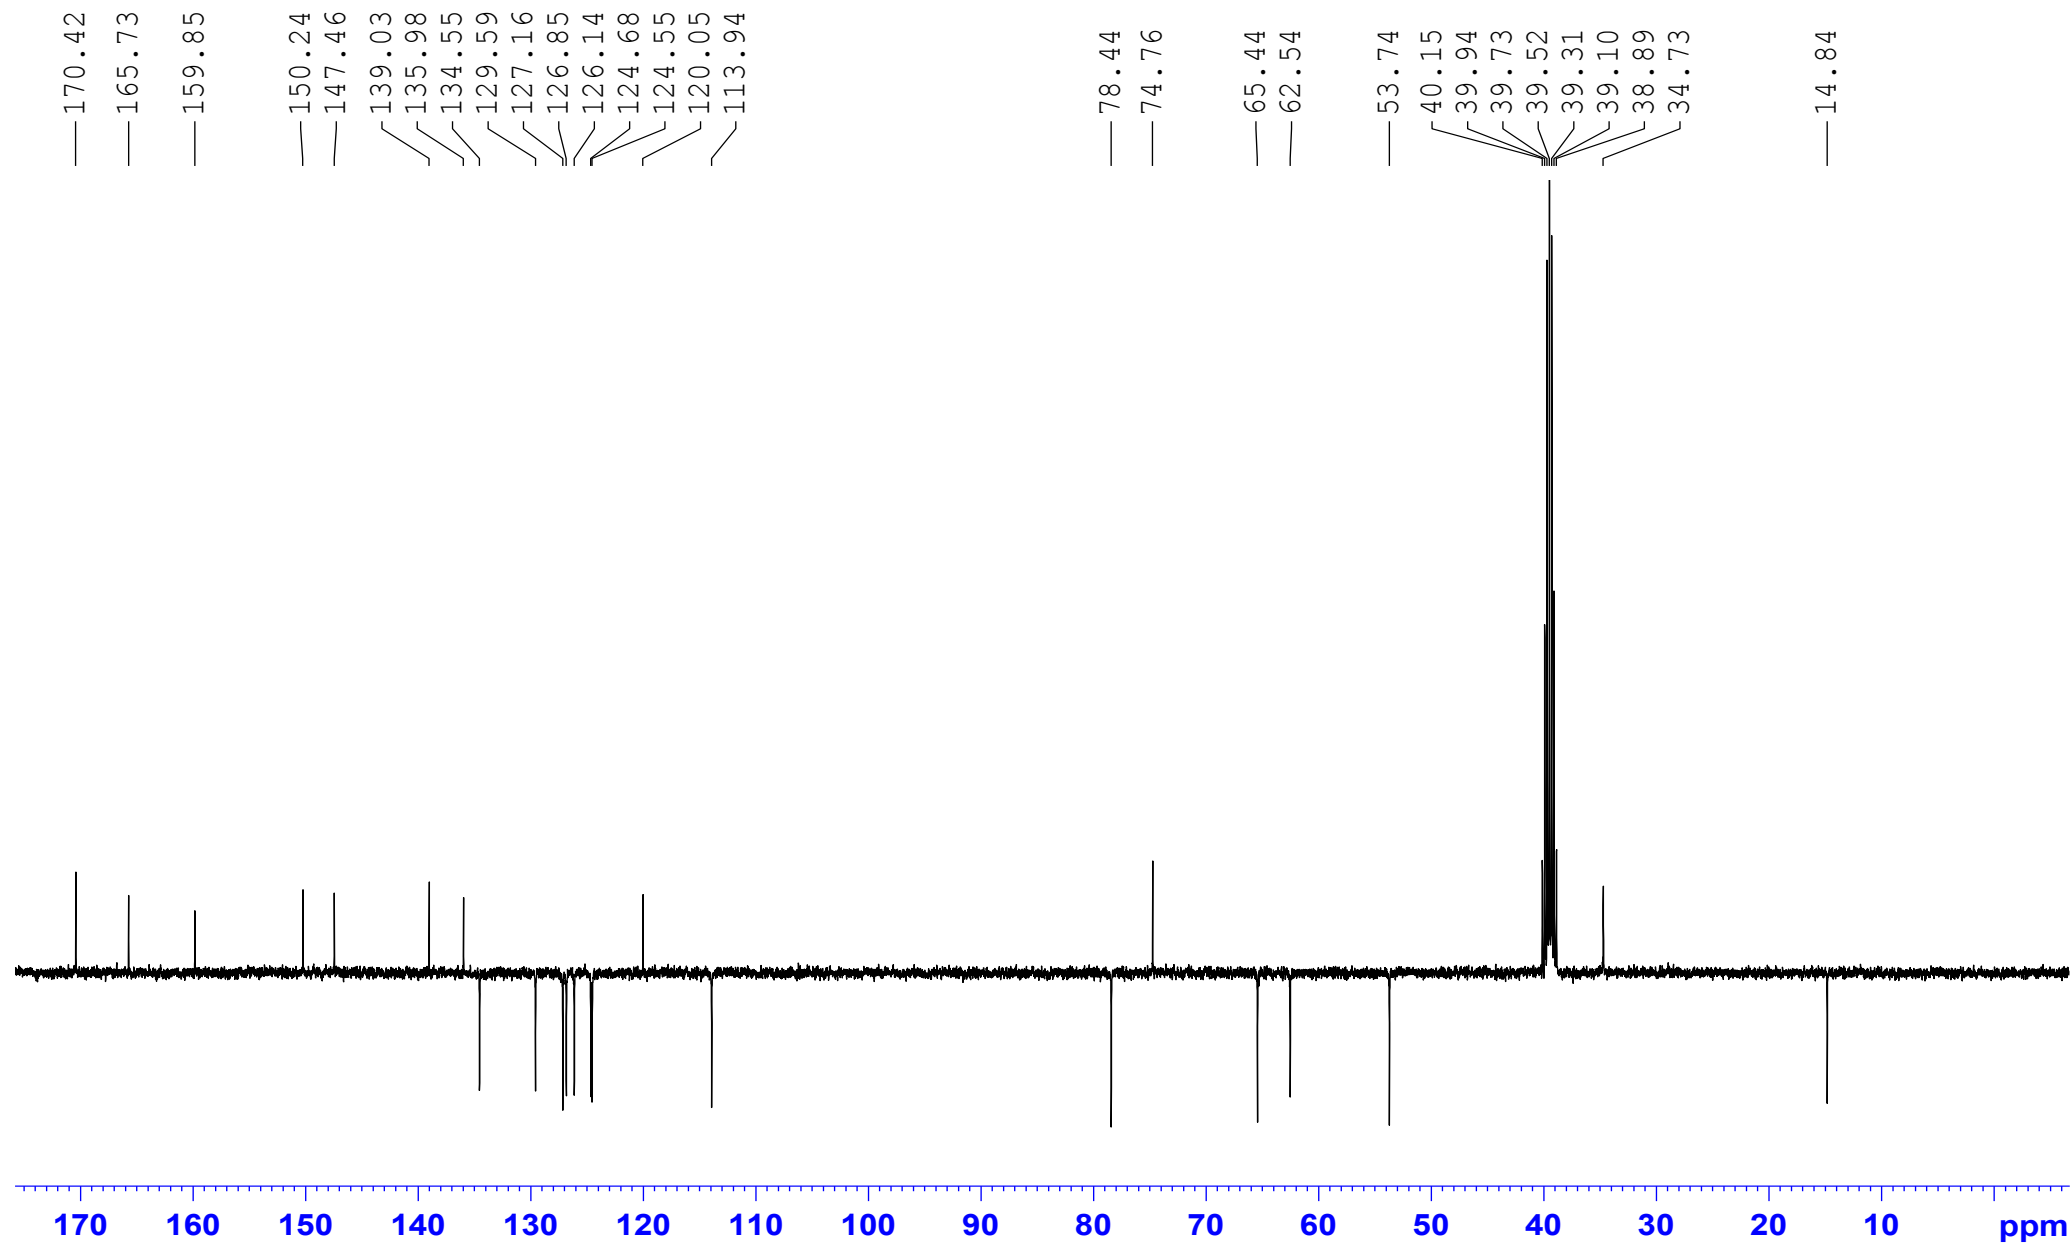

Figure S5 HSQC Spectrum of 1 in DMSO-*d*<sub>6</sub>

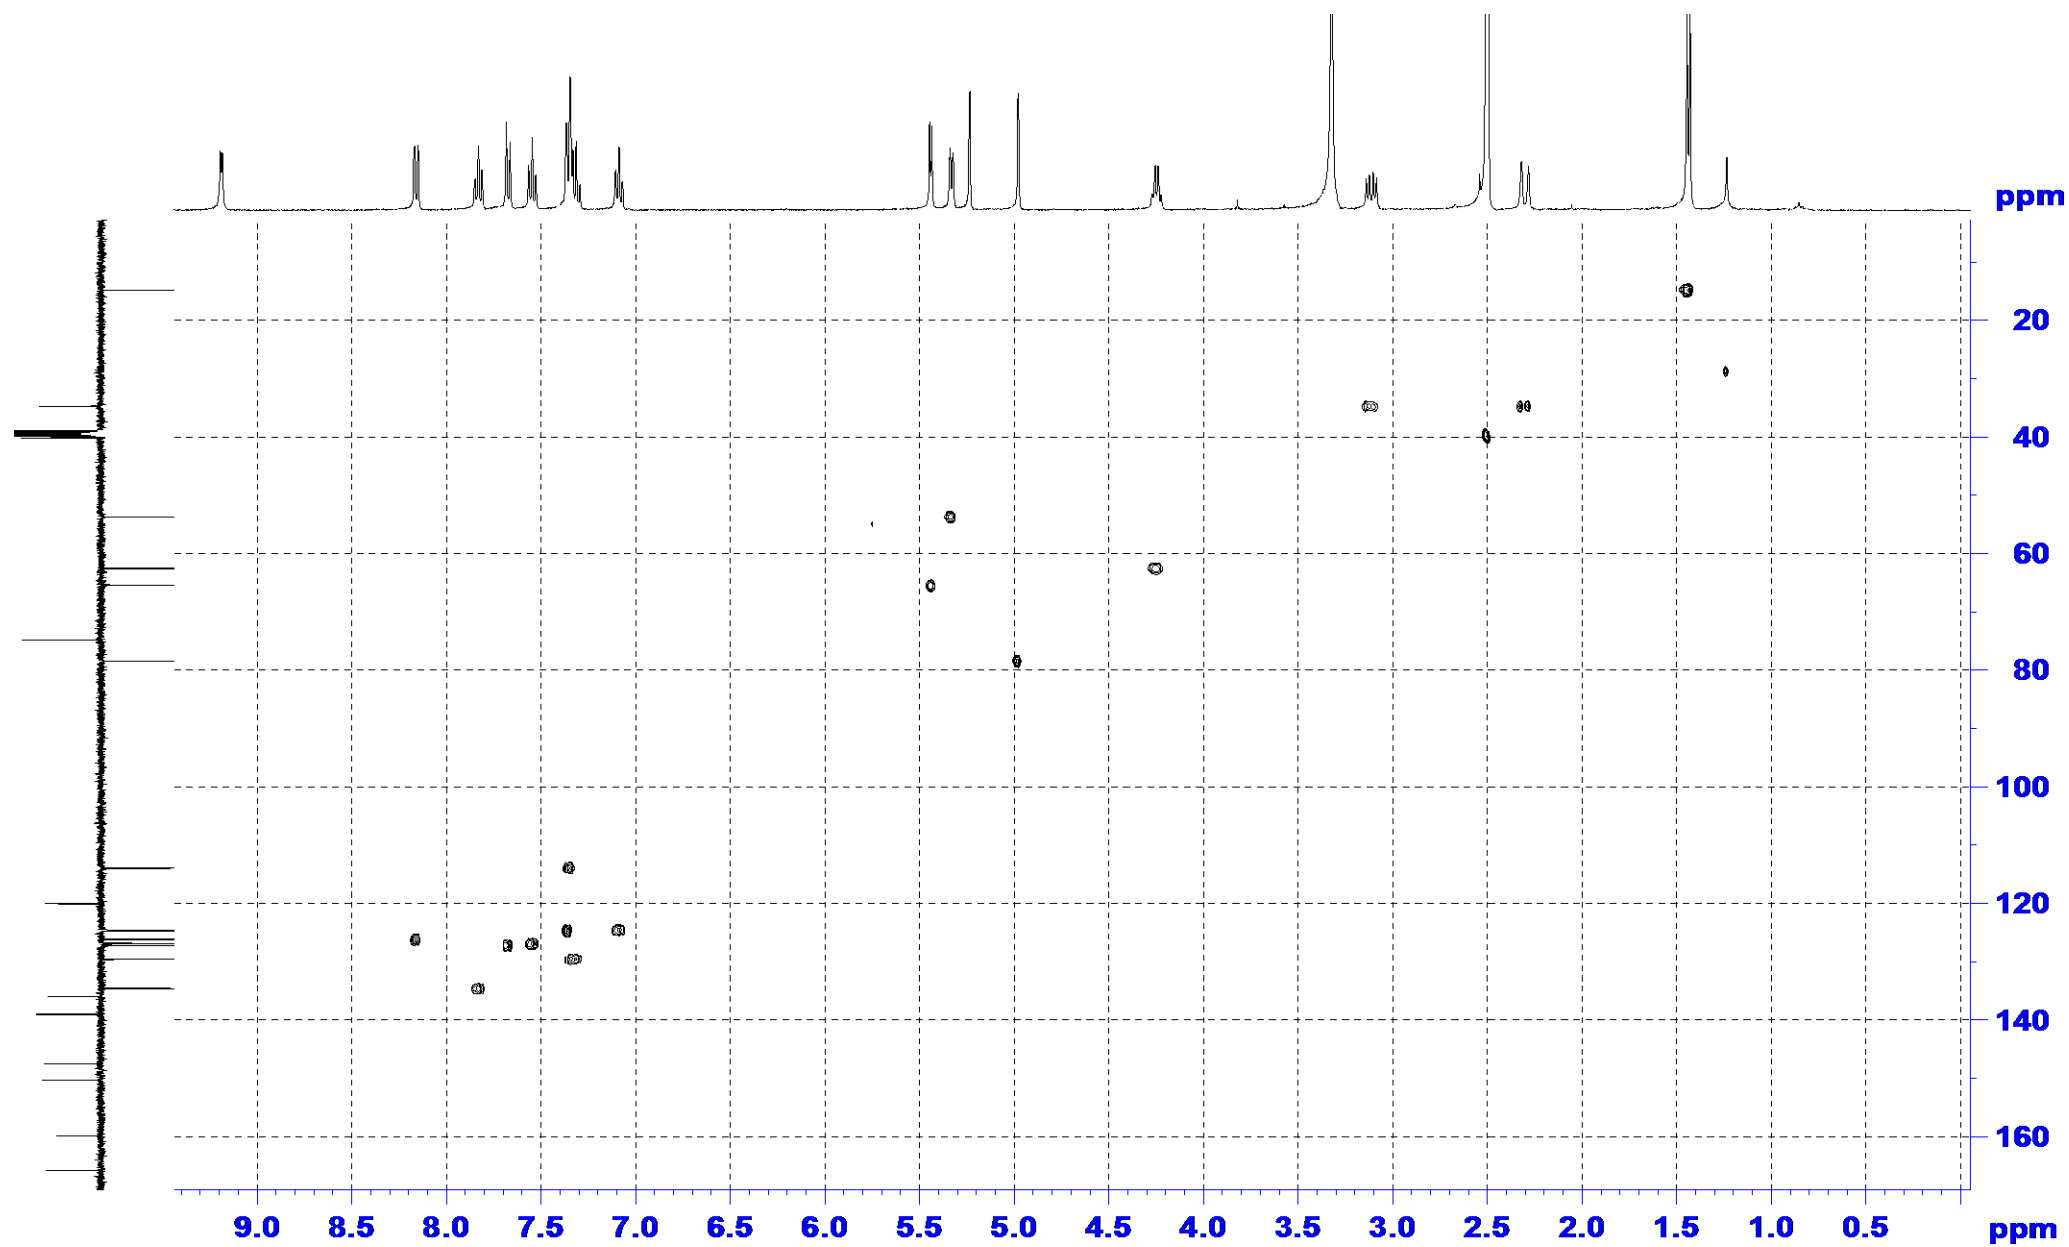

Figure S6  $^1\text{H}$ - $^1\text{H}$  COSY Spectrum of **1** in  $\text{DMSO-}d_6$

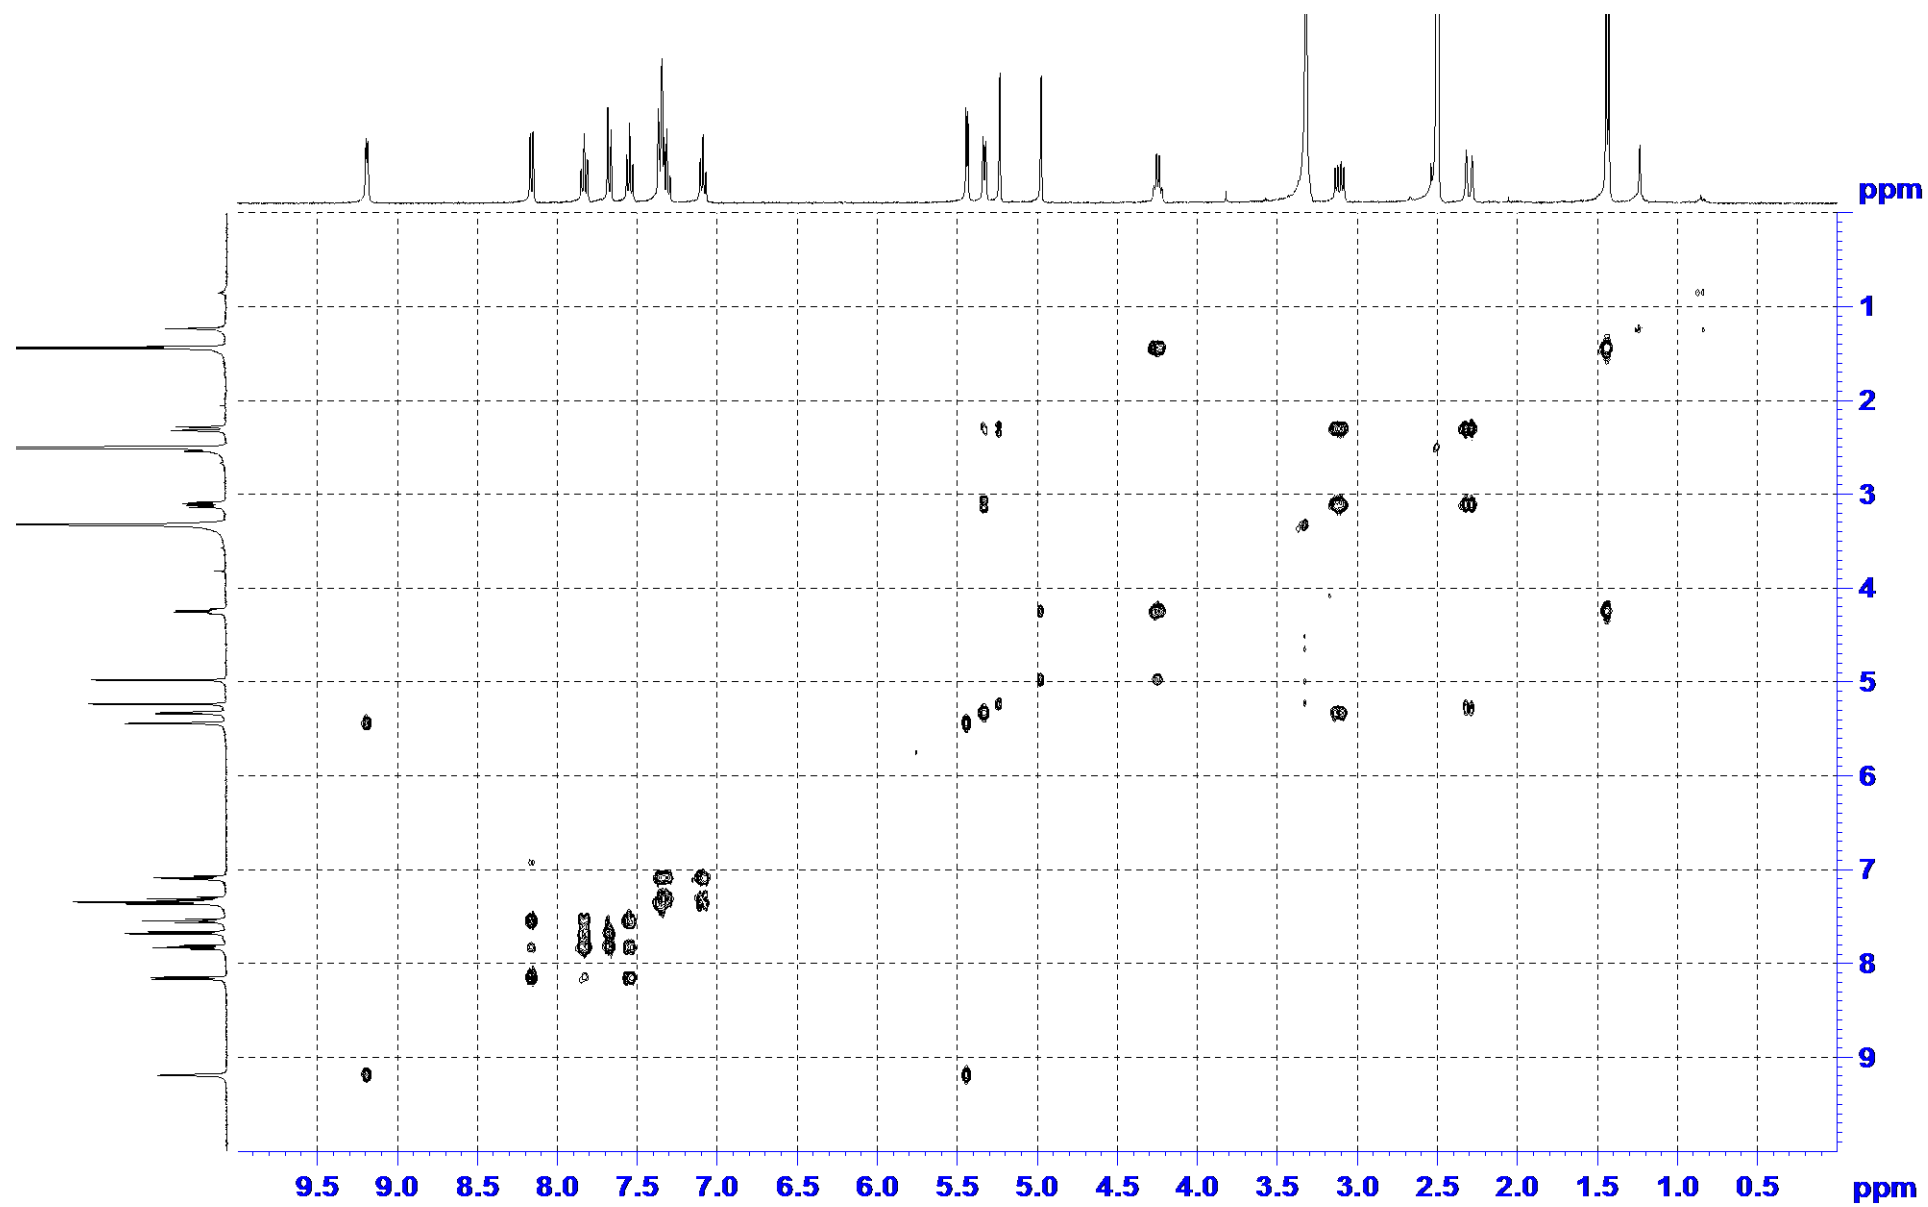



Figure S7 HMBC Spectrum of **1** in DMSO- $d_6$

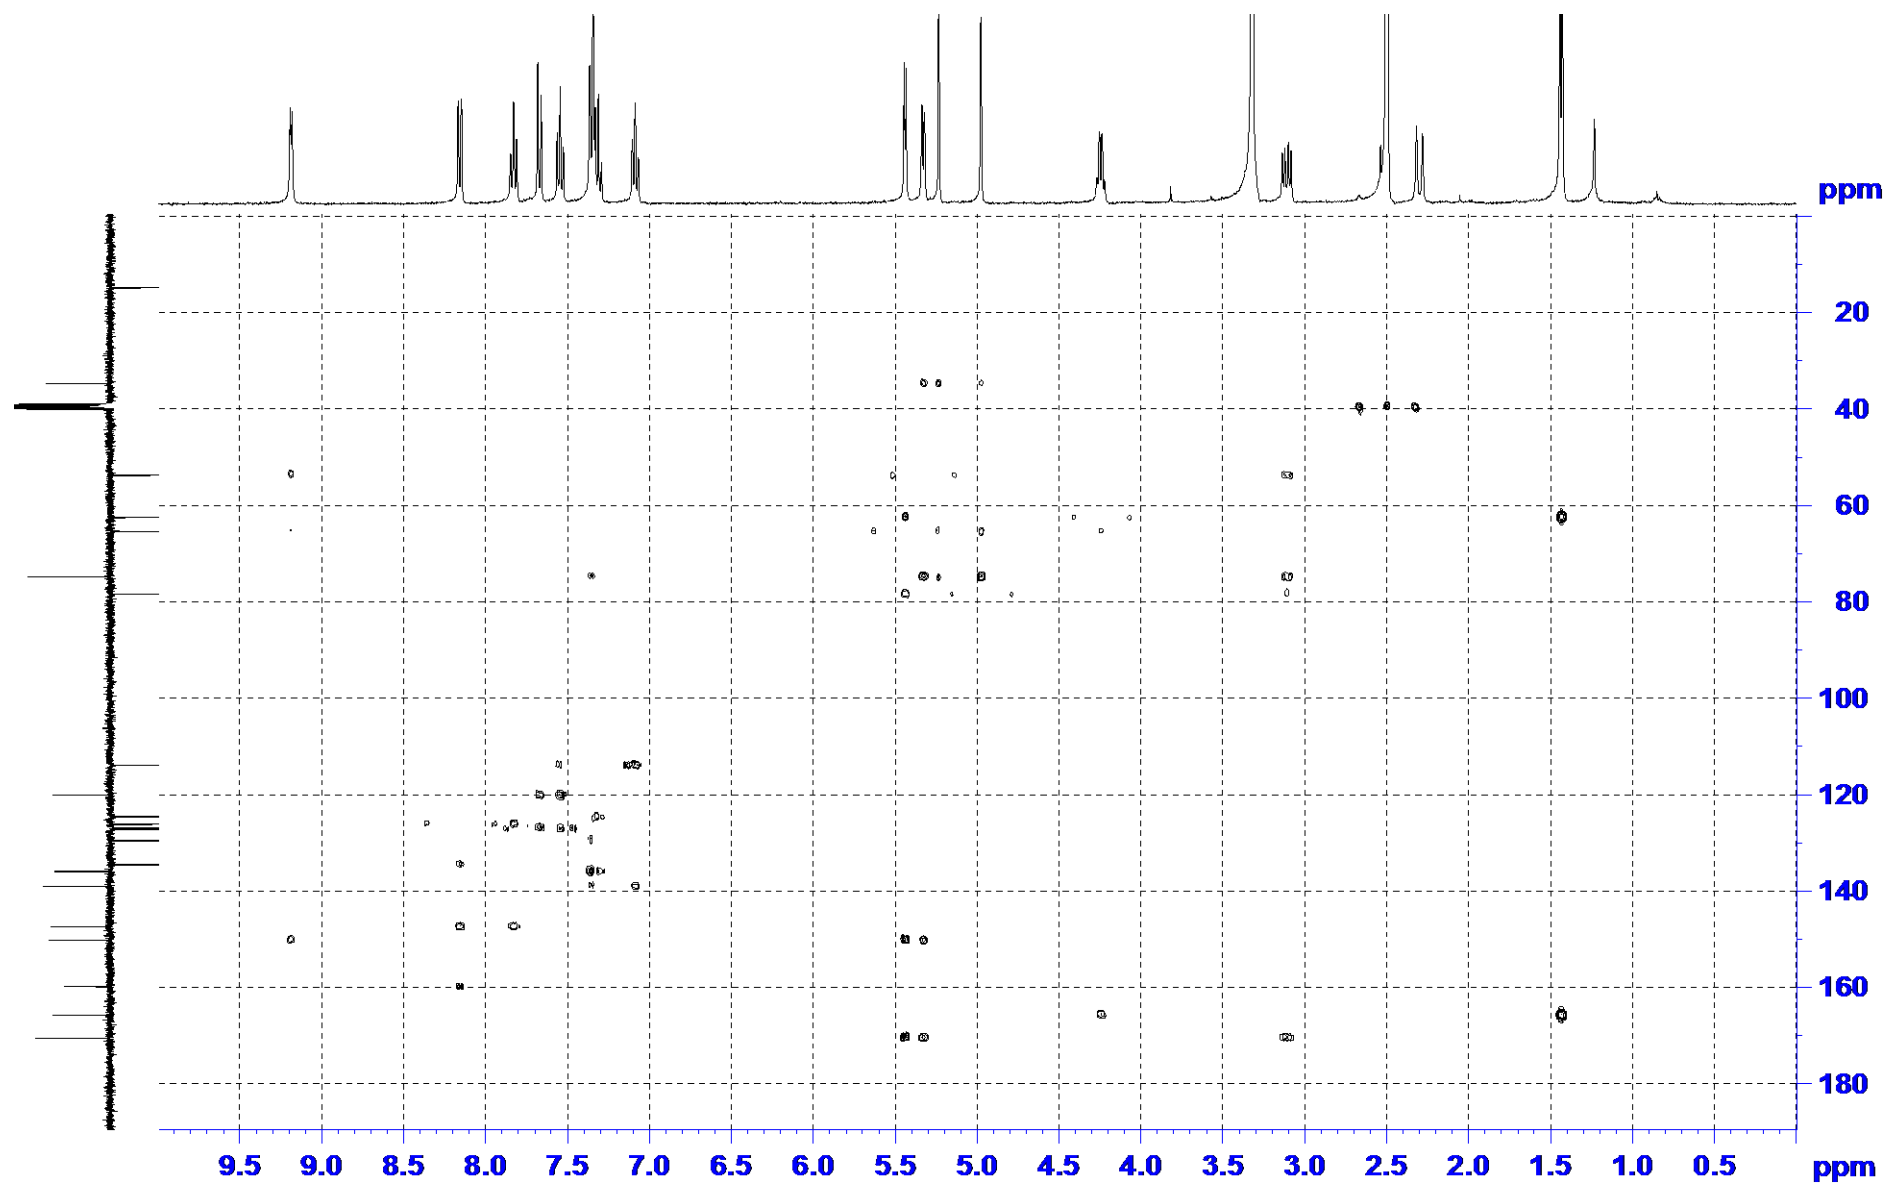

Figure S8 NOESY Spectrum of **1** in DMSO- $d_6$

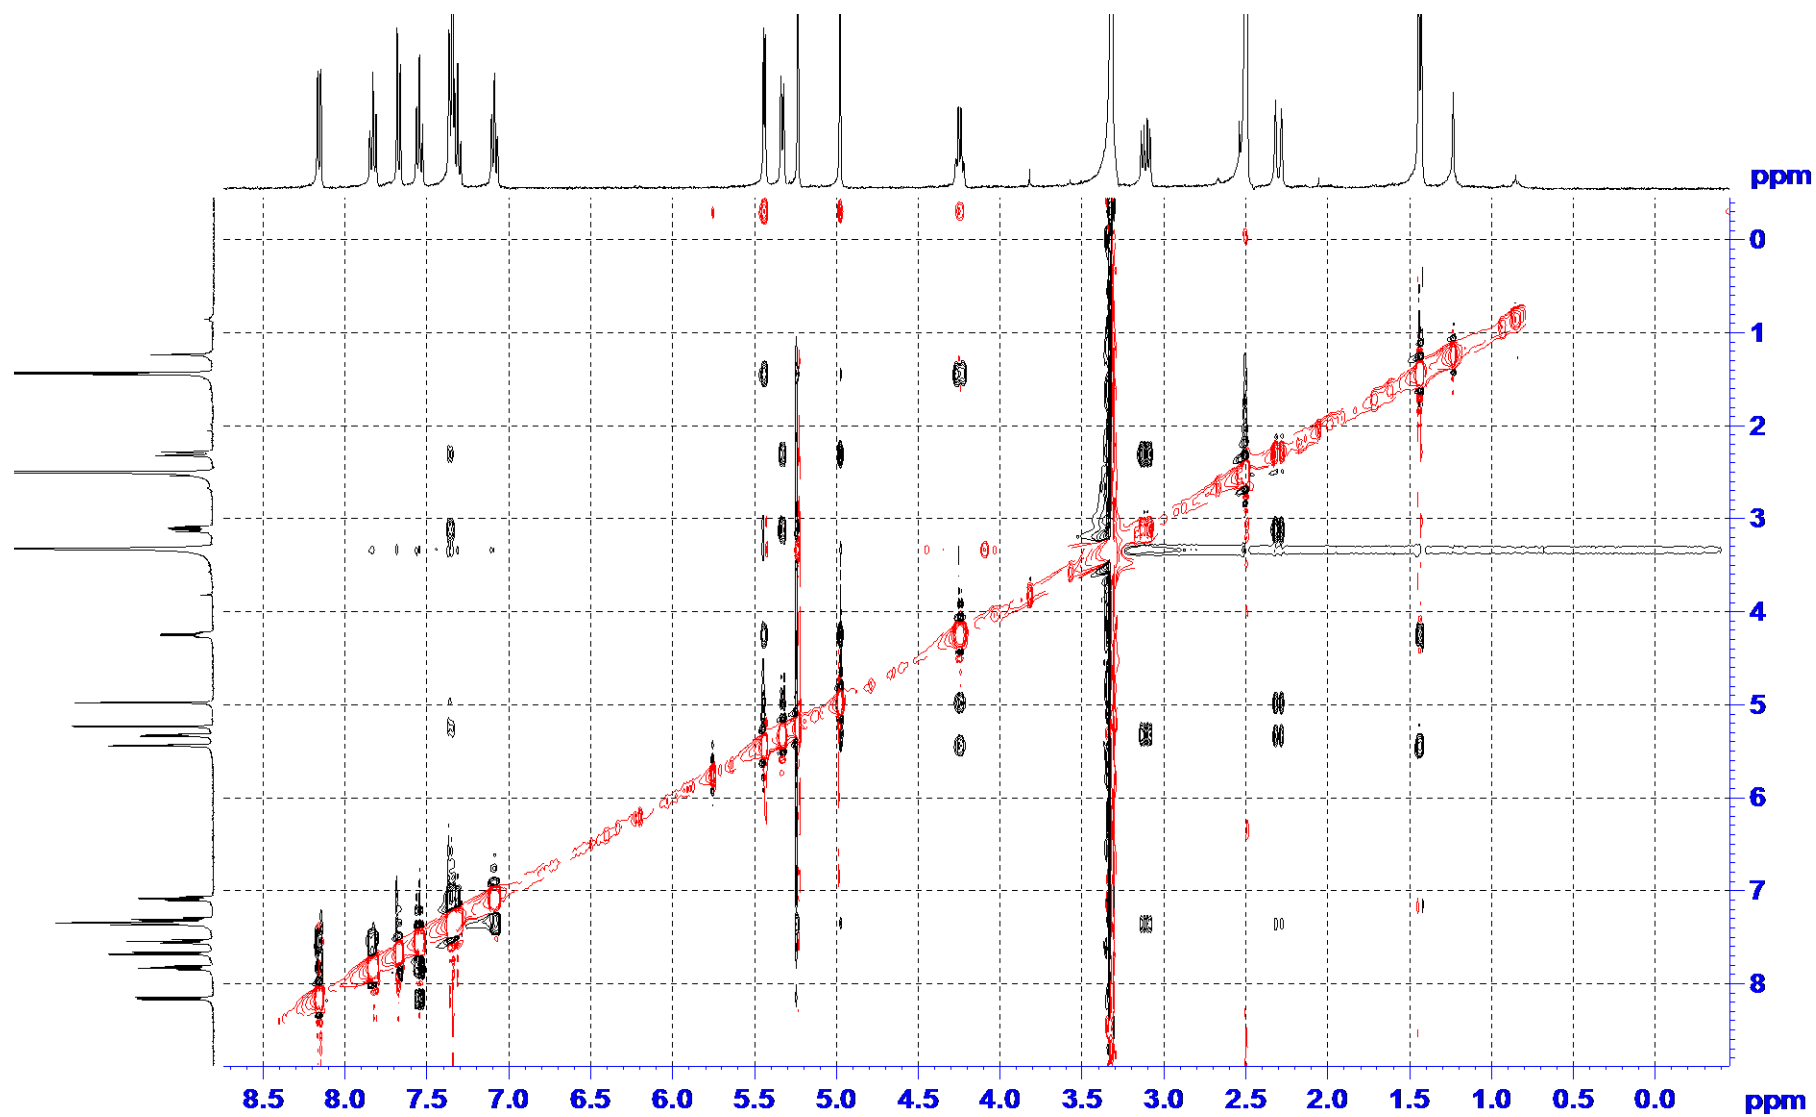

Figure S9 HRESIMS Data of 1

Xevo G2 Q-TOF/YCA166#

LZD-14-1-51 POS 12 (0.233) Cm (10:16-(1:6+22:54))

08-Sep-2016

Waters

1: TOF MS ES+

7.94e5

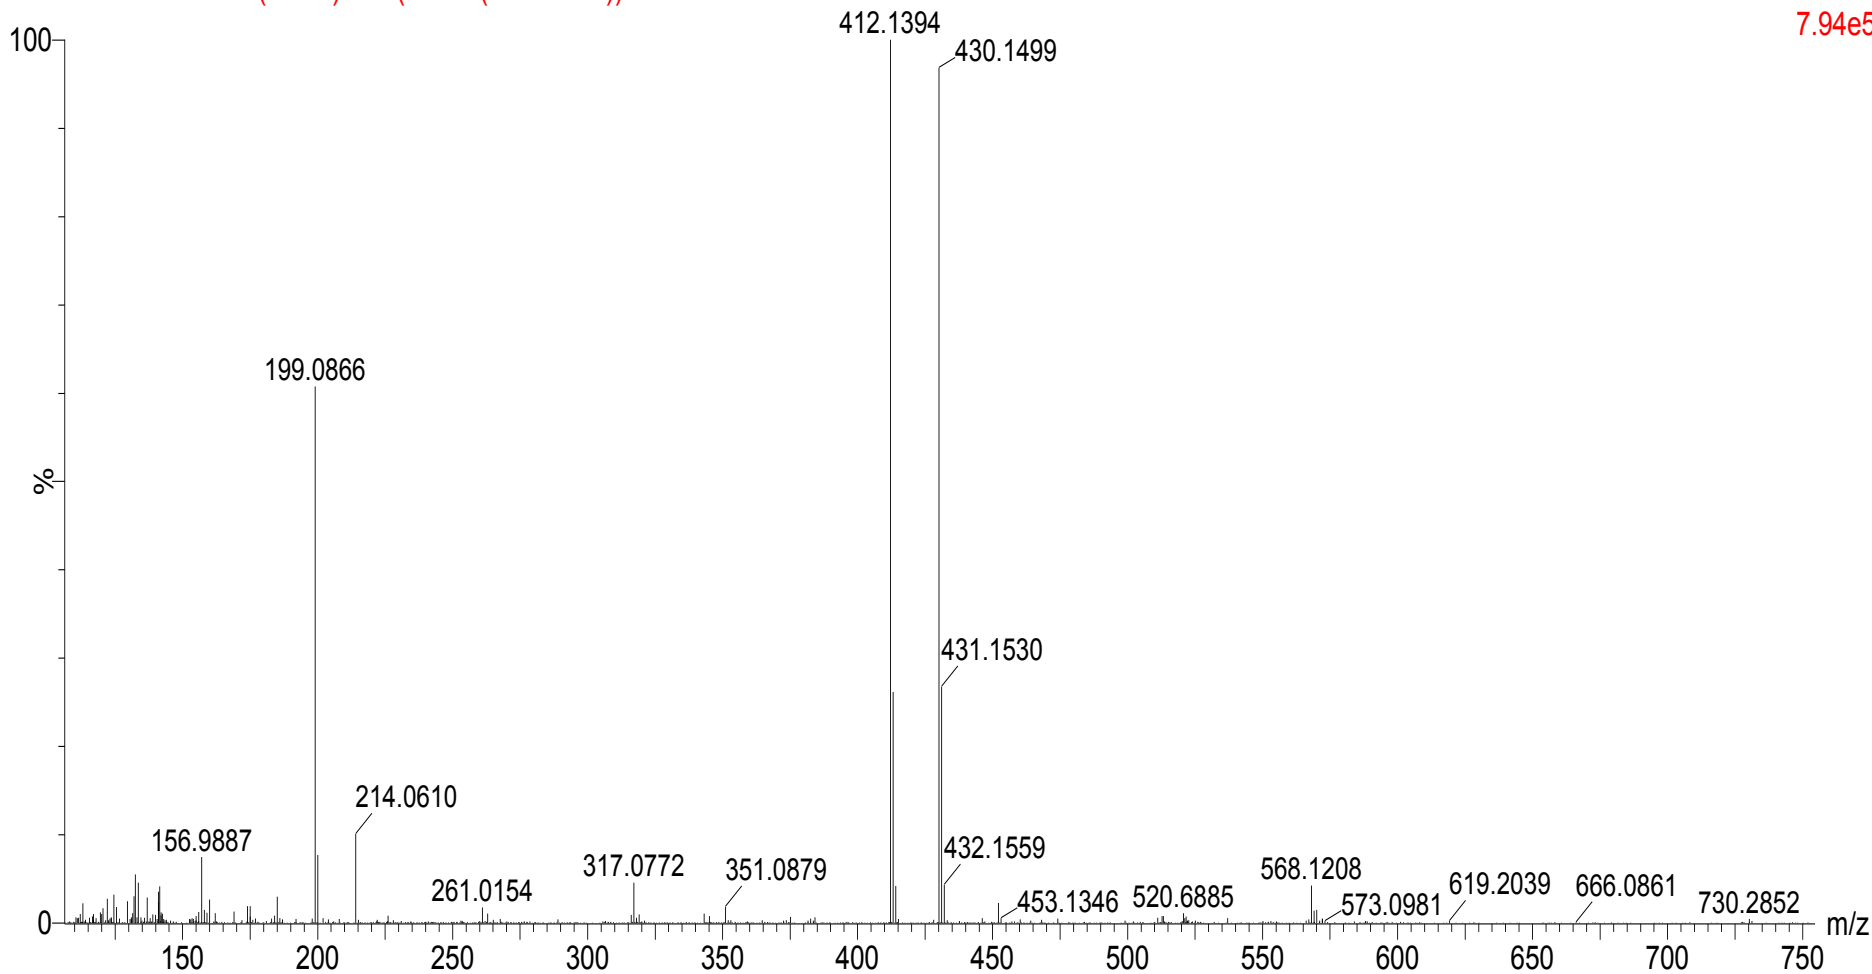

**Figure S10** UV spectrum of **2**

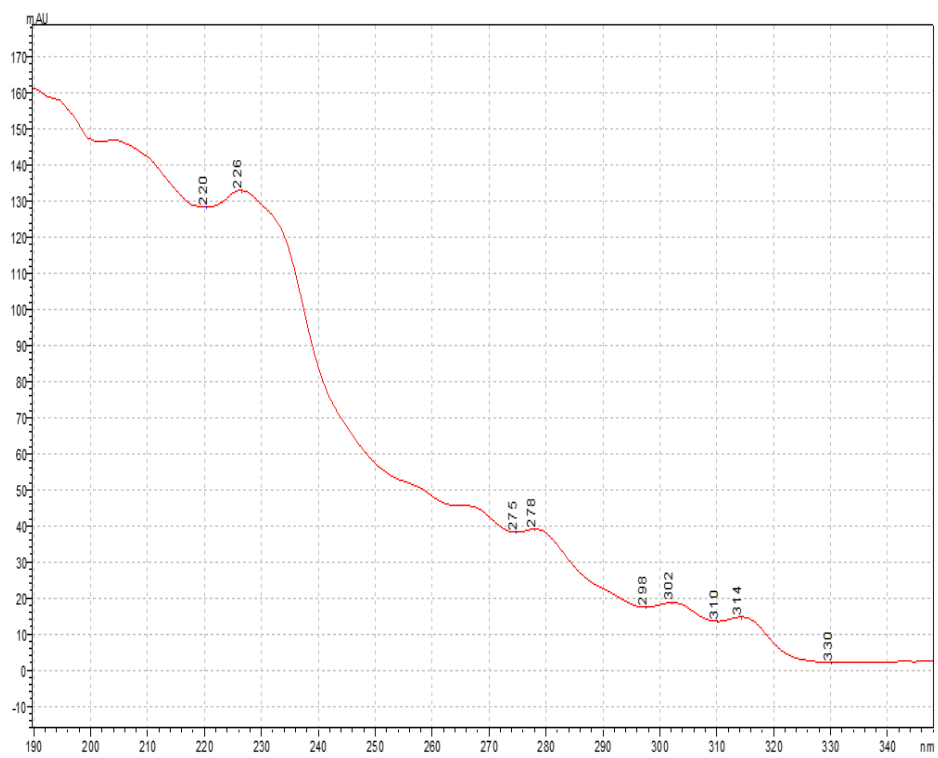

UV spectrum of compound **2**

Figure S11 IR Spectrum of 2

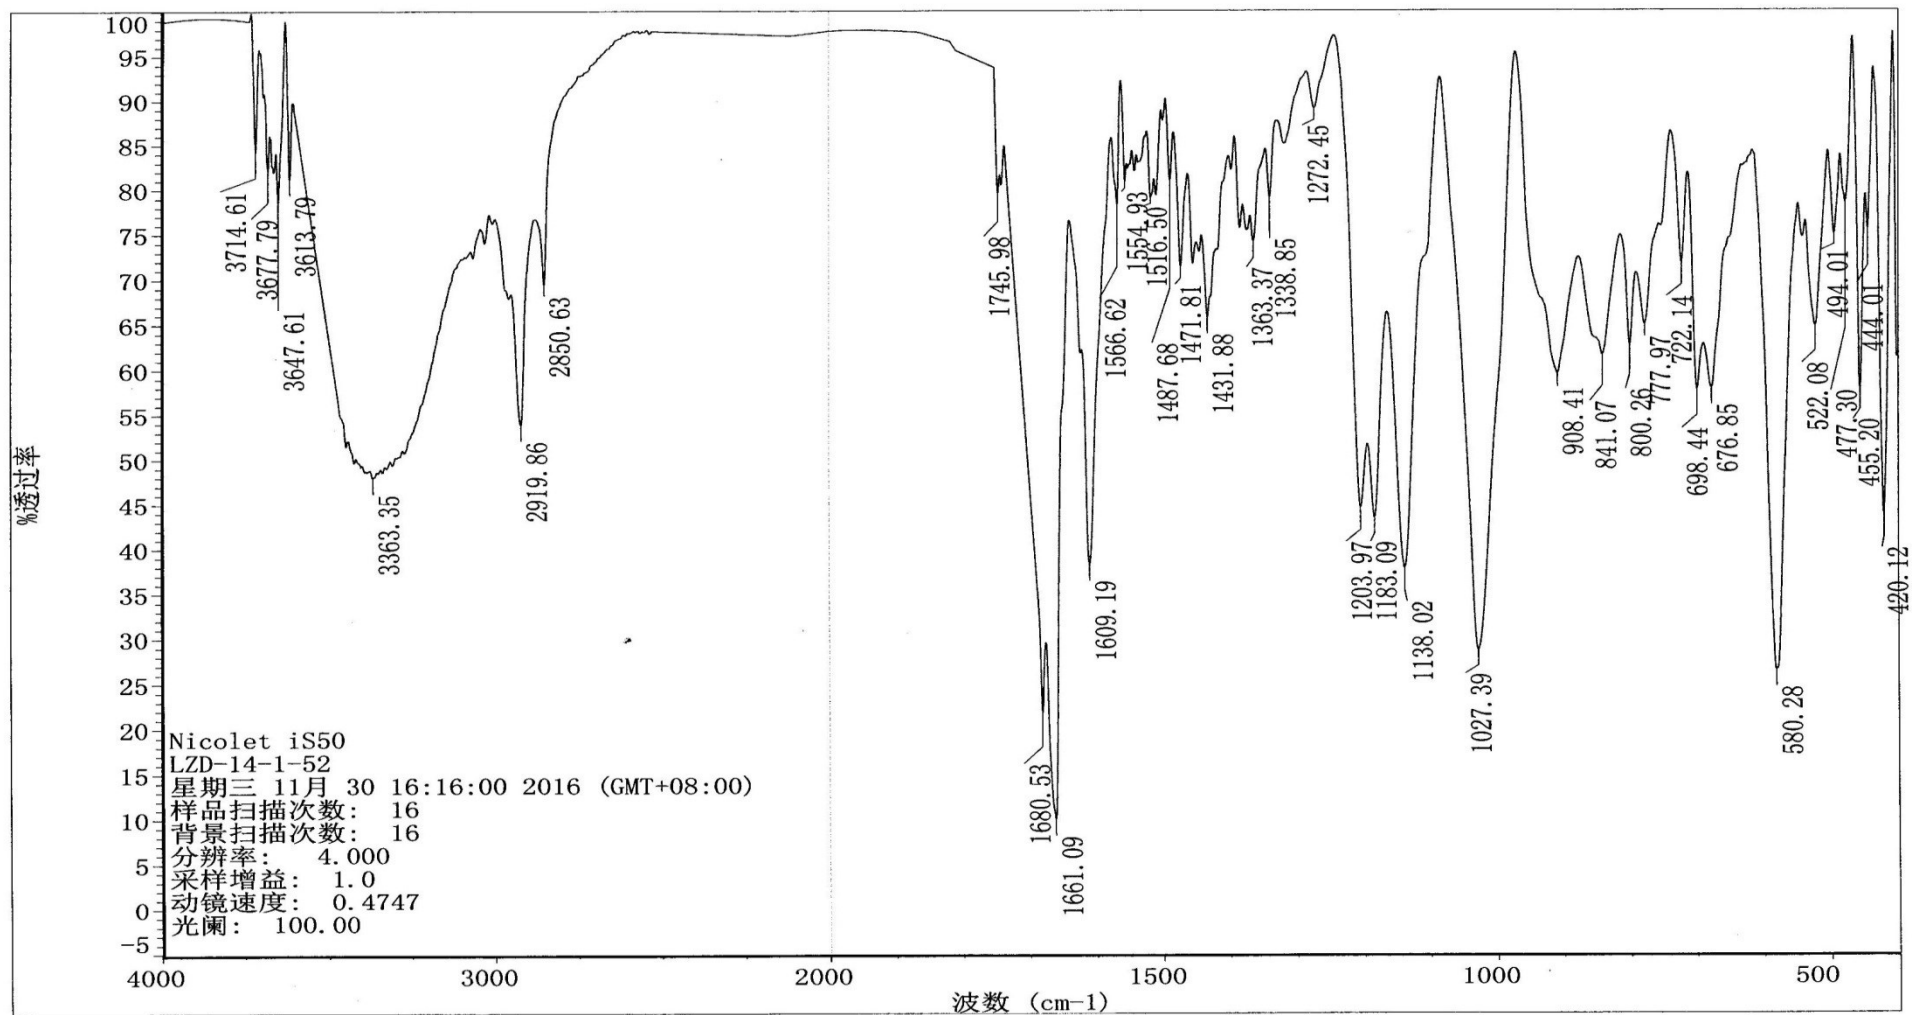

**Figure S12**  $^1\text{H}$  NMR Spectrum of **2** in  $\text{DMSO-}d_6$

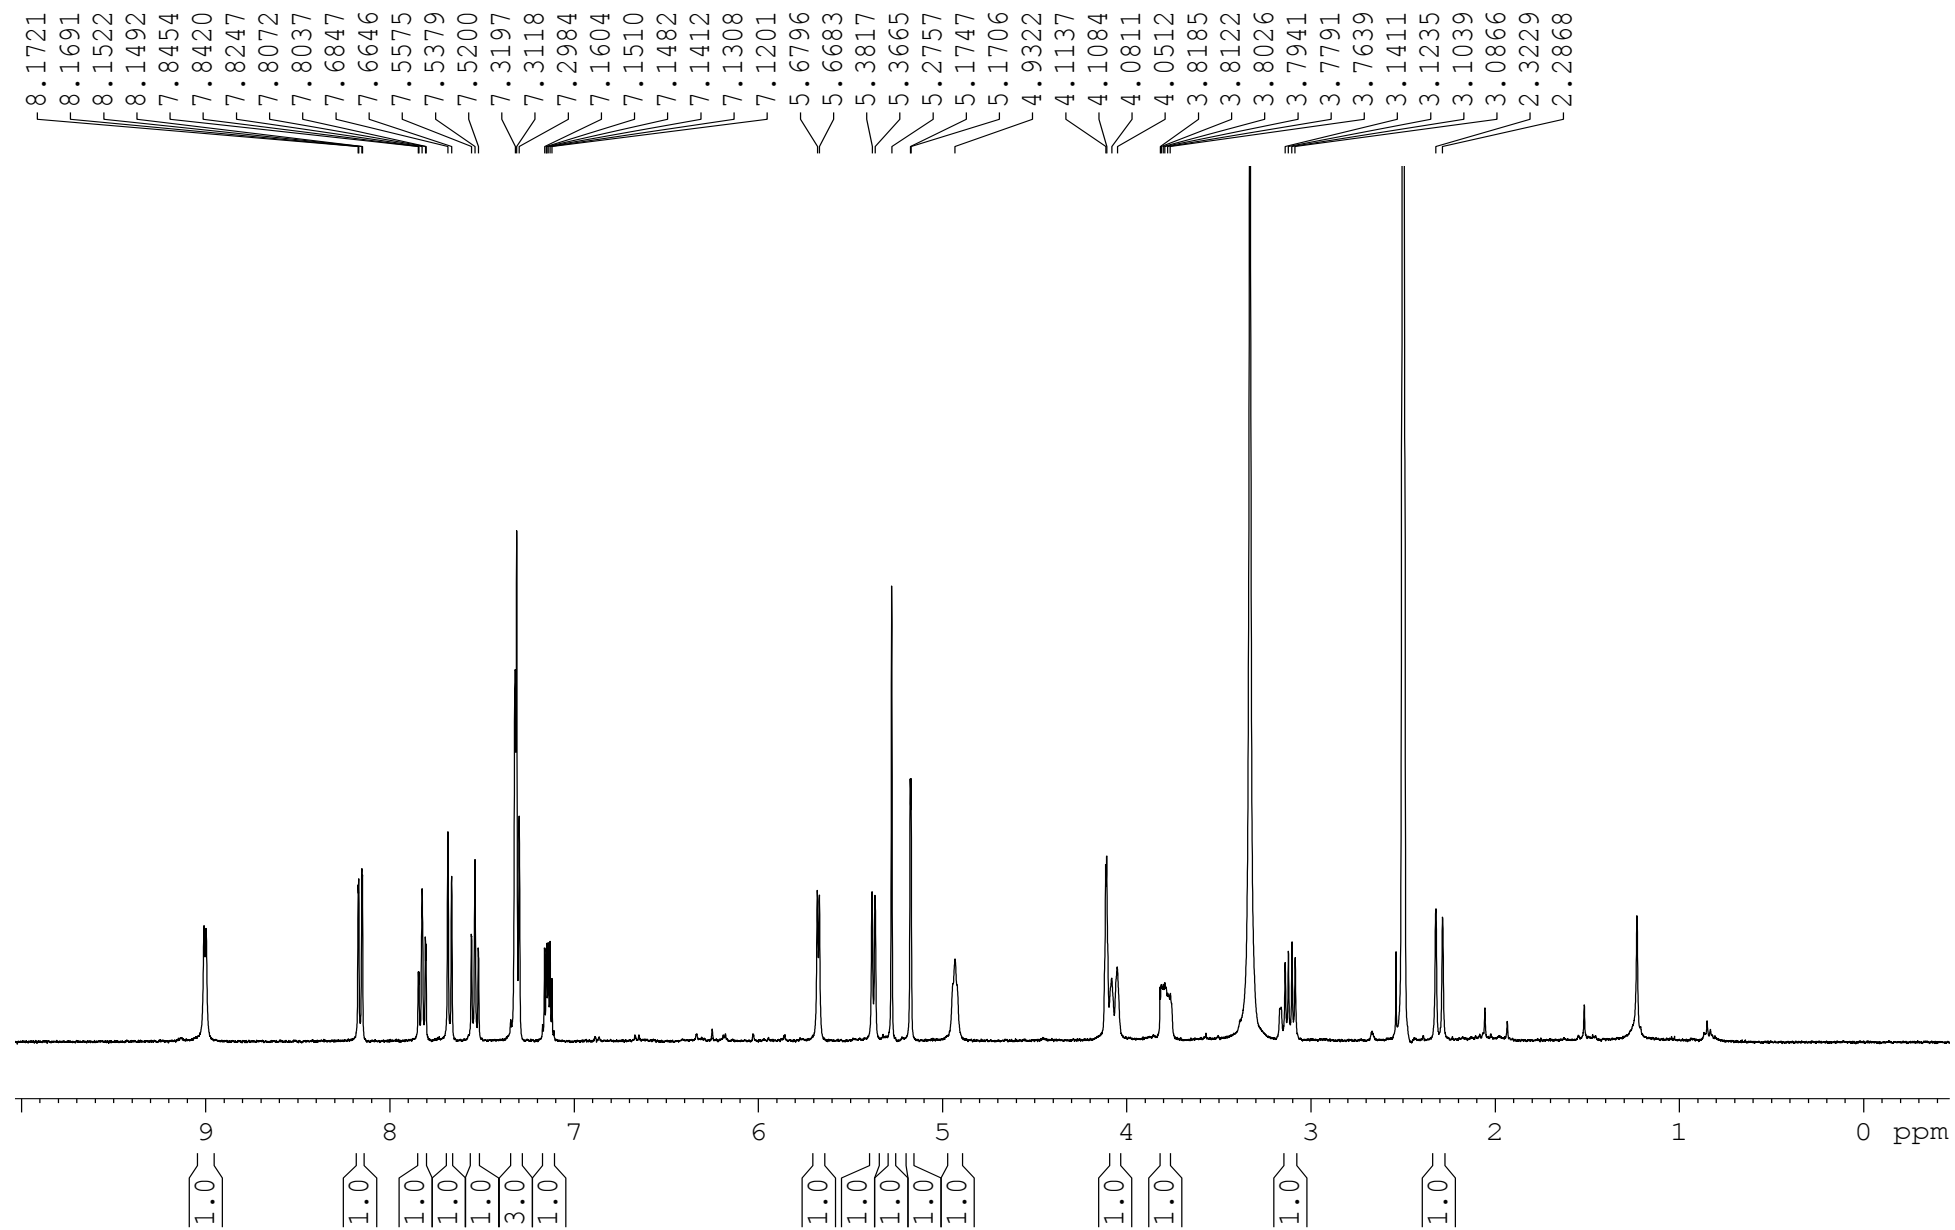

**Figure S13** DEPTQ Spectrum of **2** in DMSO-*d*<sub>6</sub>

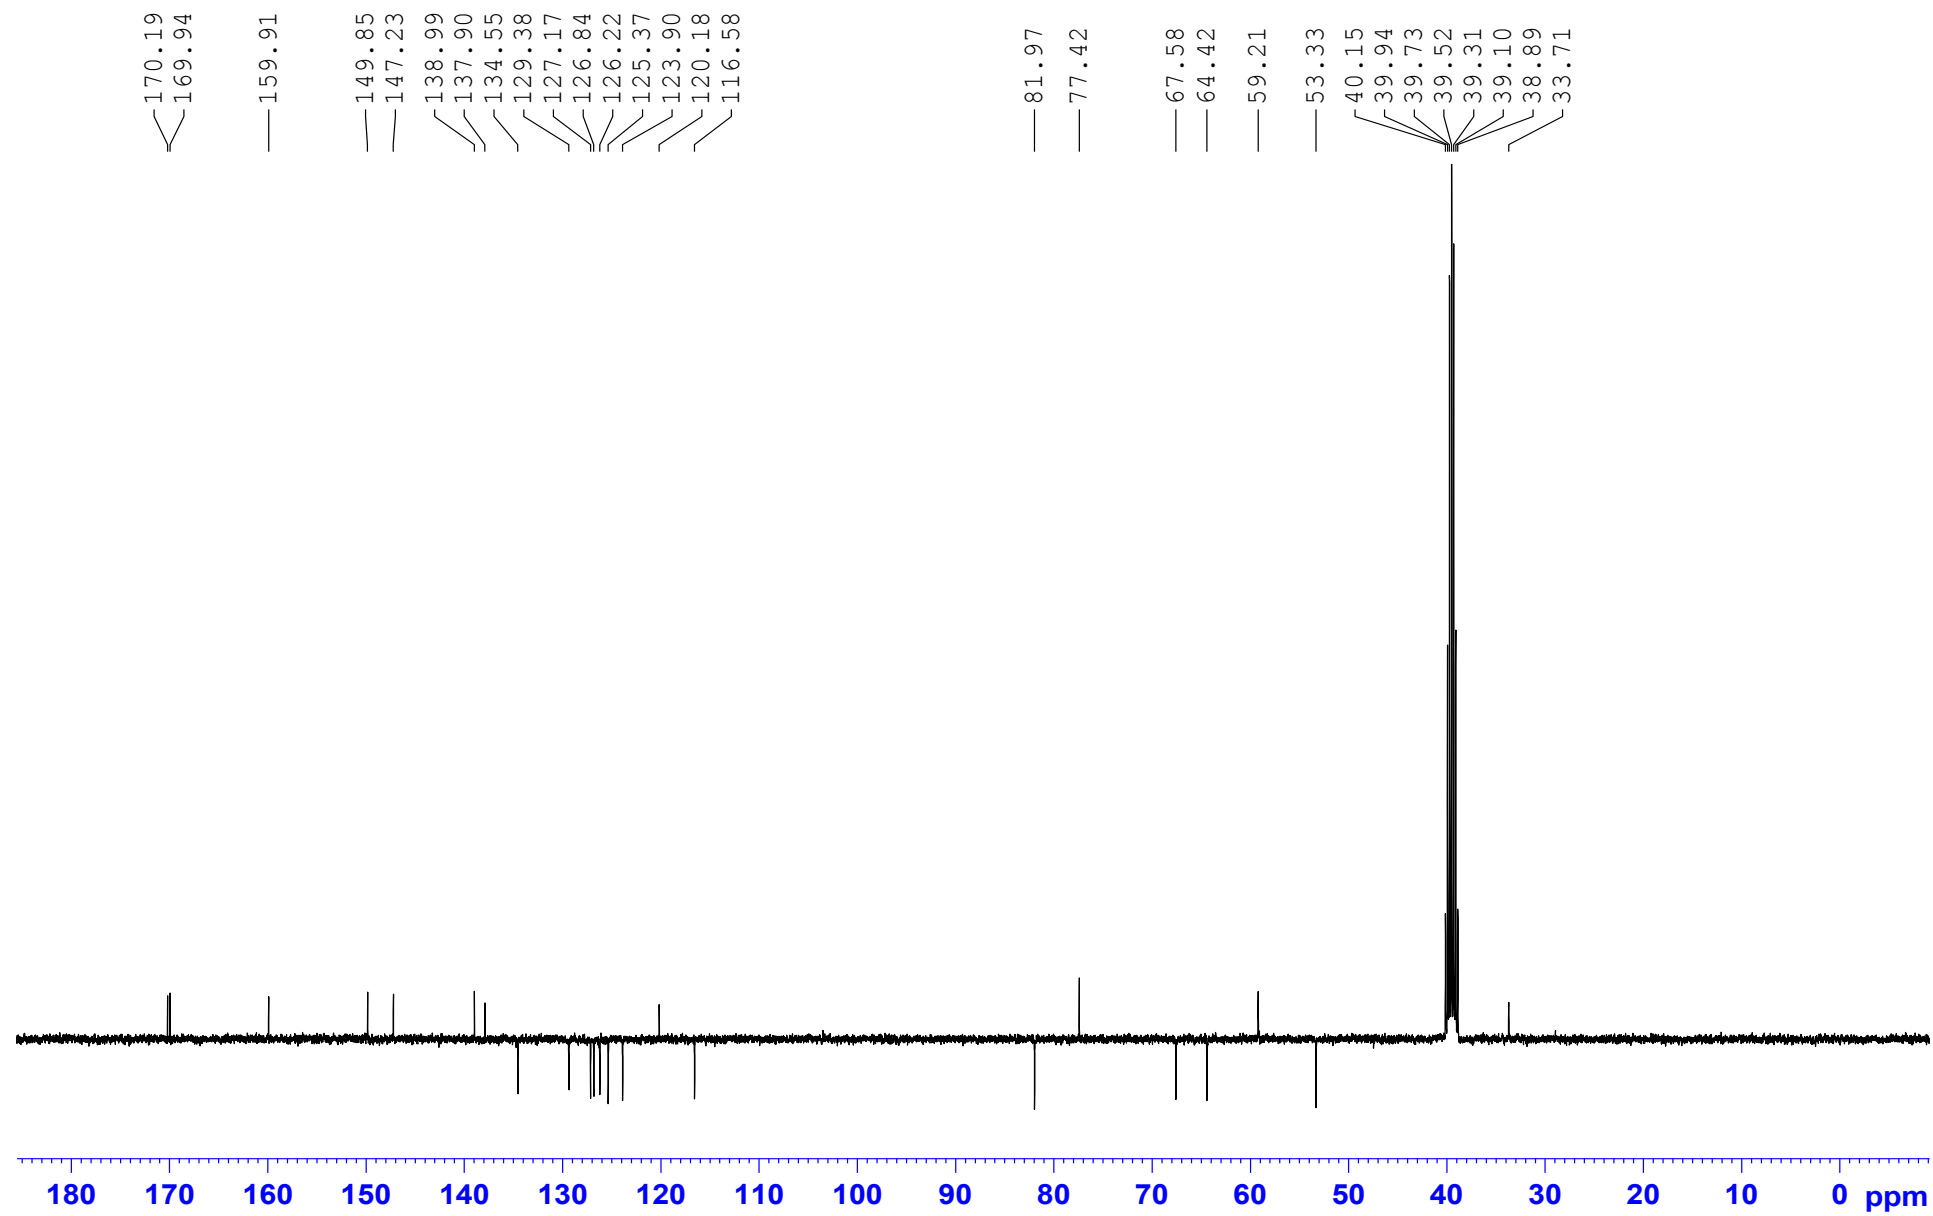

Figure S14 HSQC Spectrum of **2** in DMSO-*d*<sub>6</sub>

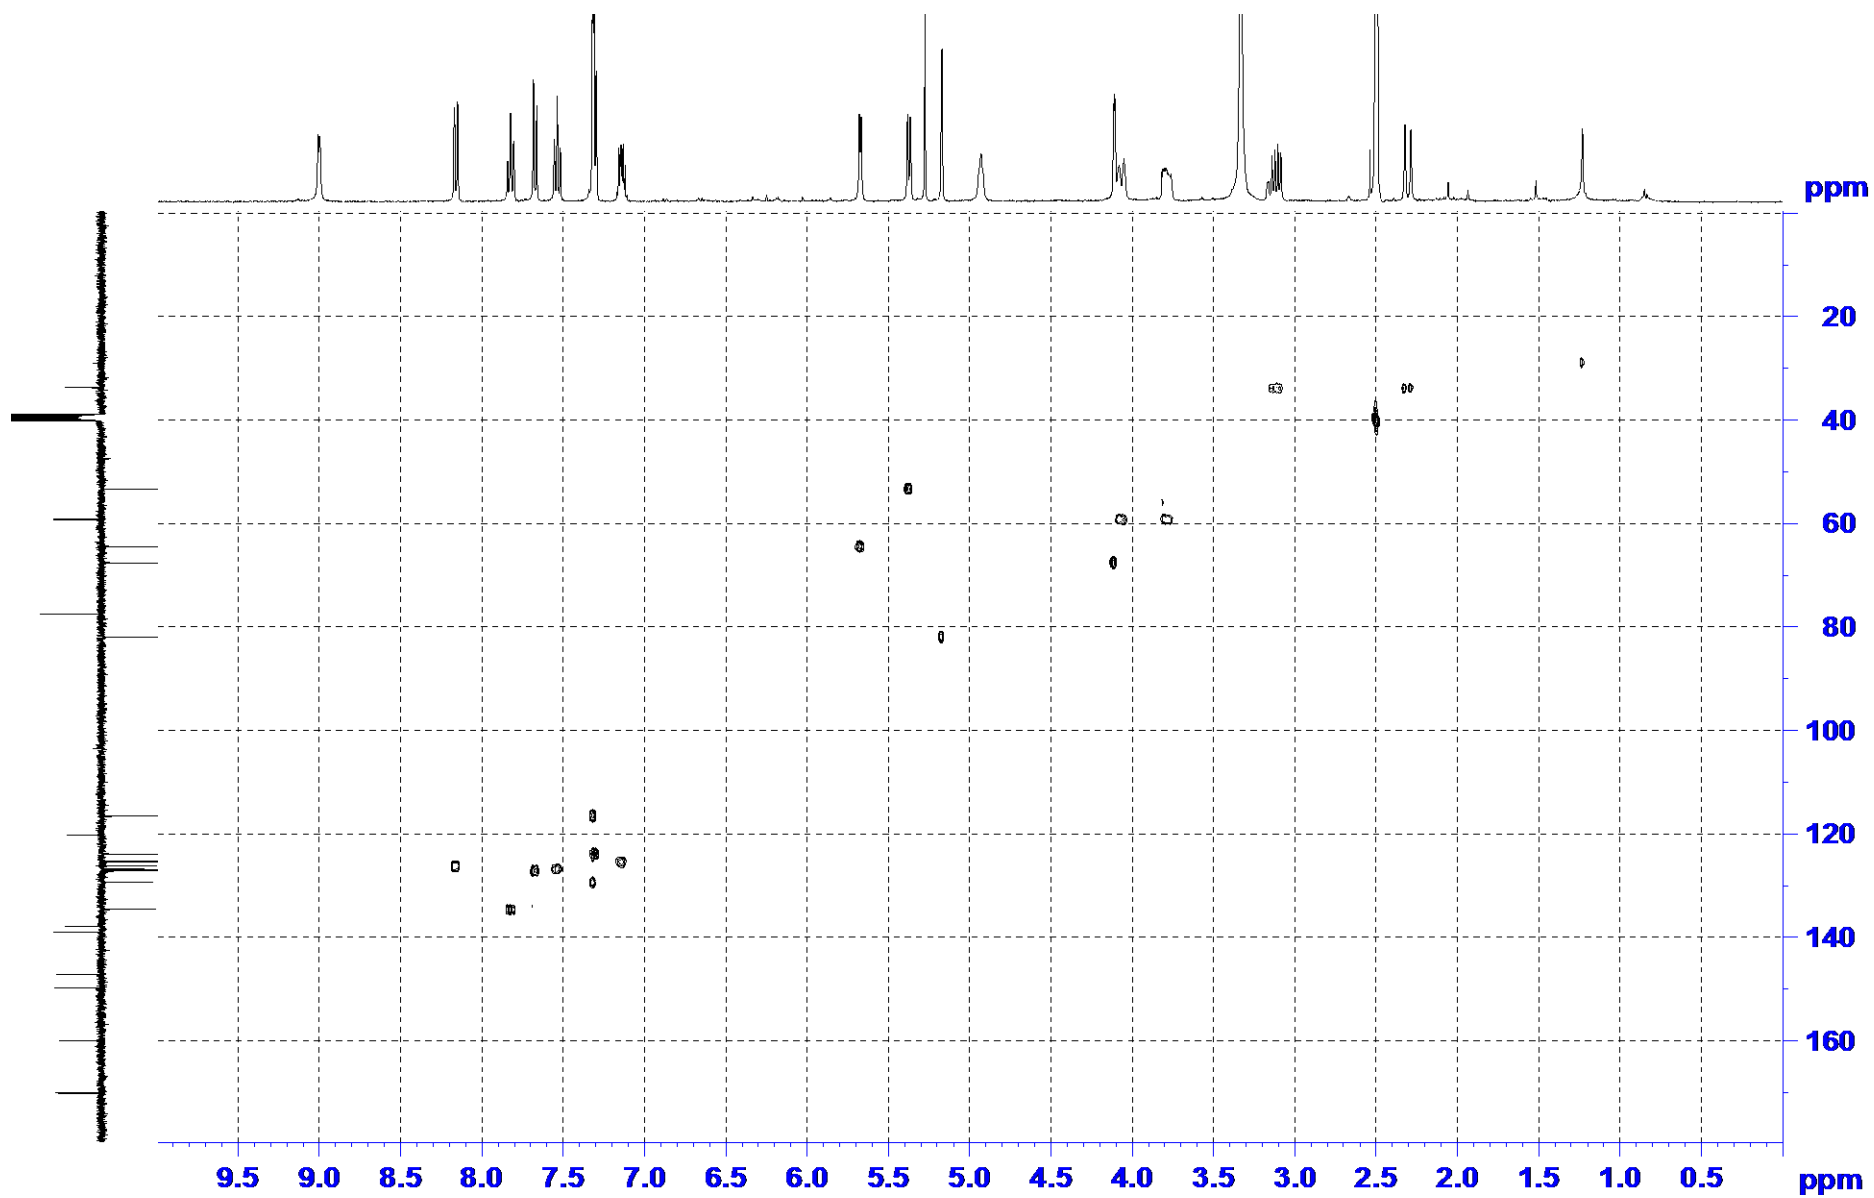



Figure S15  $^1\text{H}$ - $^1\text{H}$  COSY Spectrum of **2** in  $\text{DMSO-}d_6$

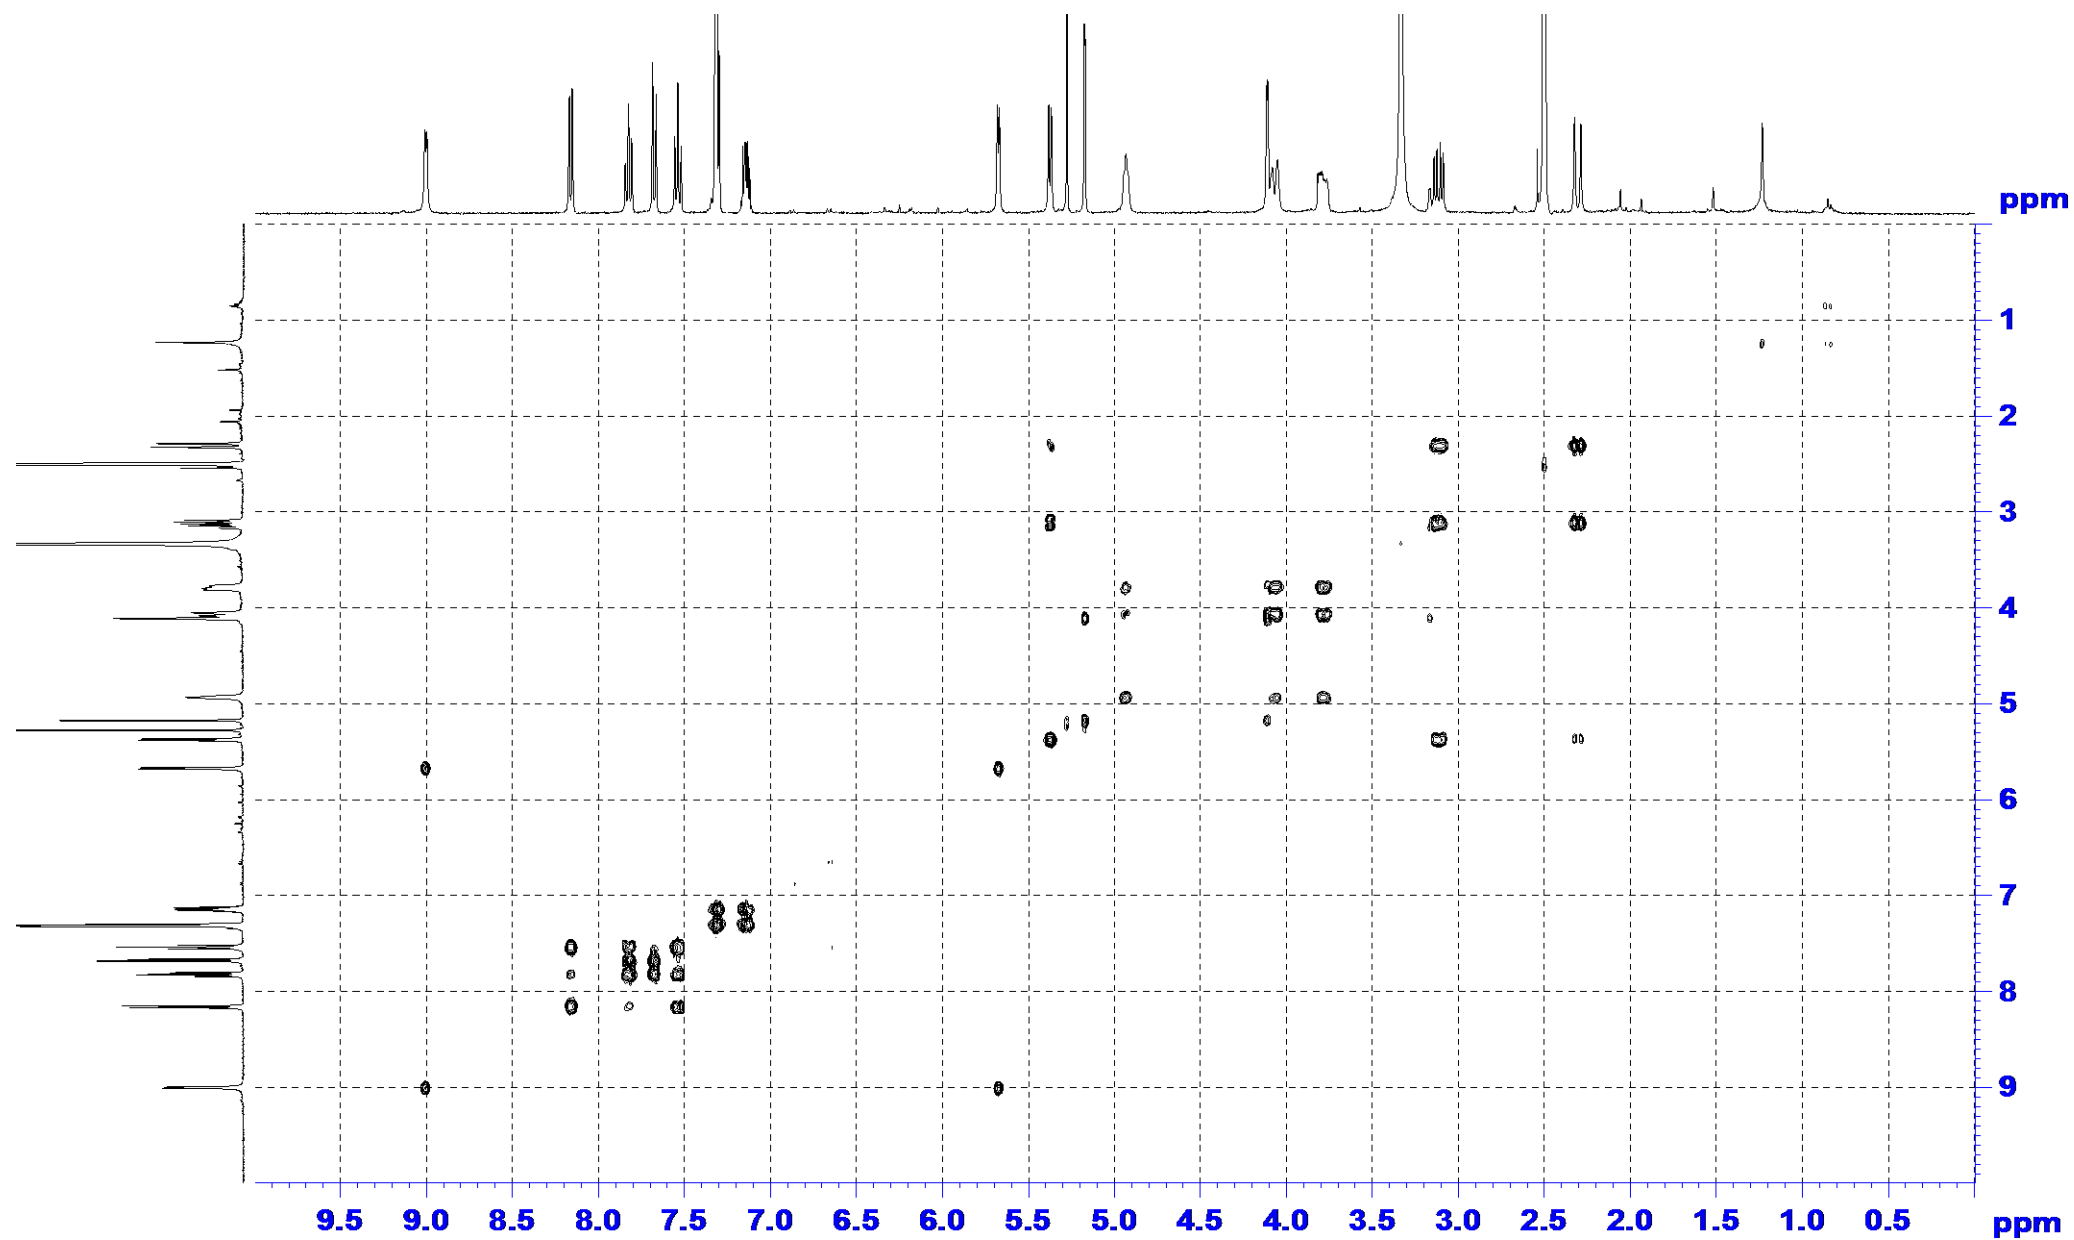

Figure S16 HMBC Spectrum of **2** in DMSO-*d*<sub>6</sub>

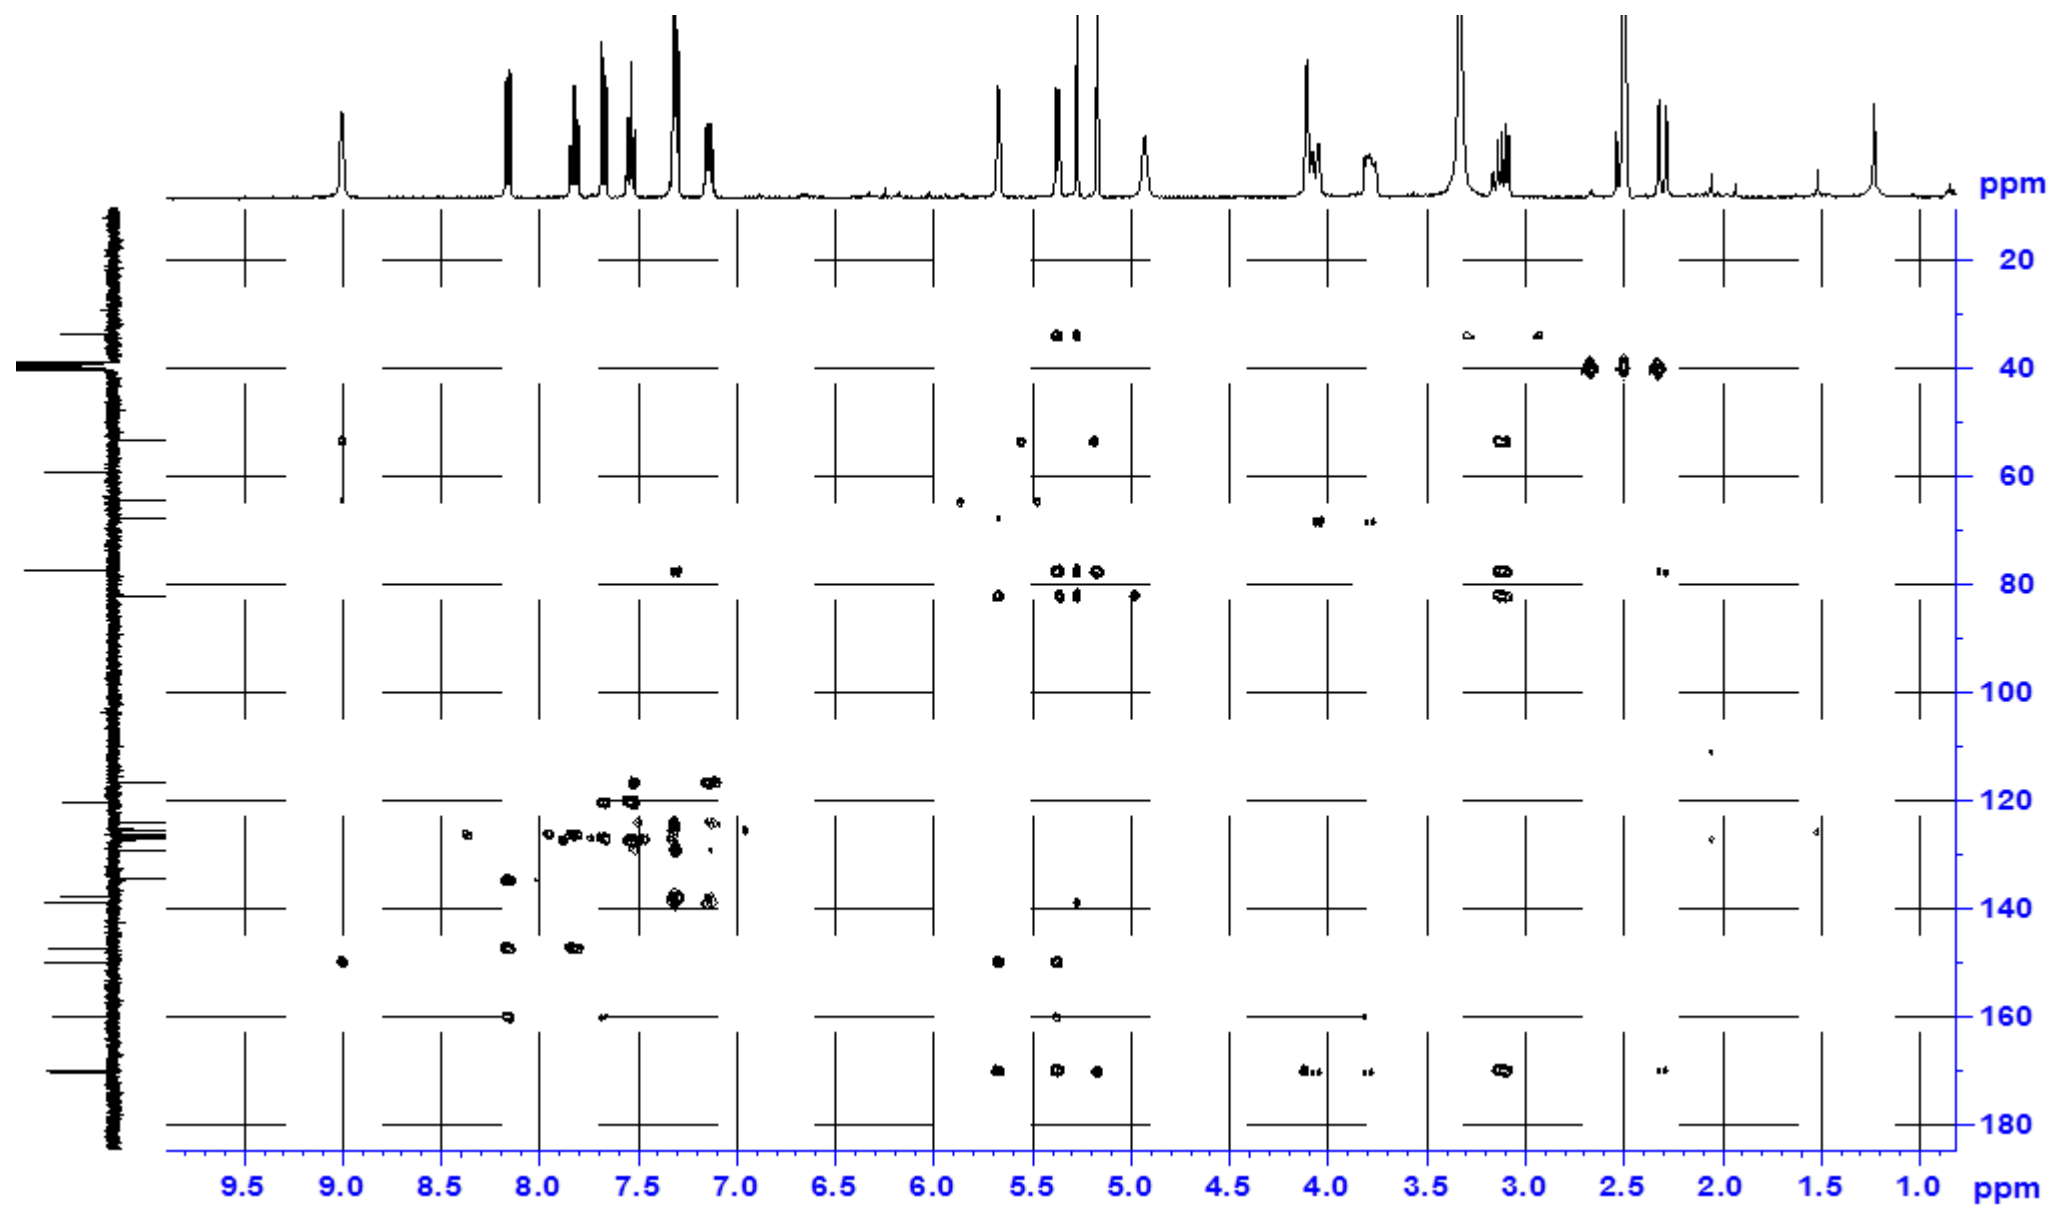

Figure S17 NOESY Spectrum of **2** in DMSO- $d_6$

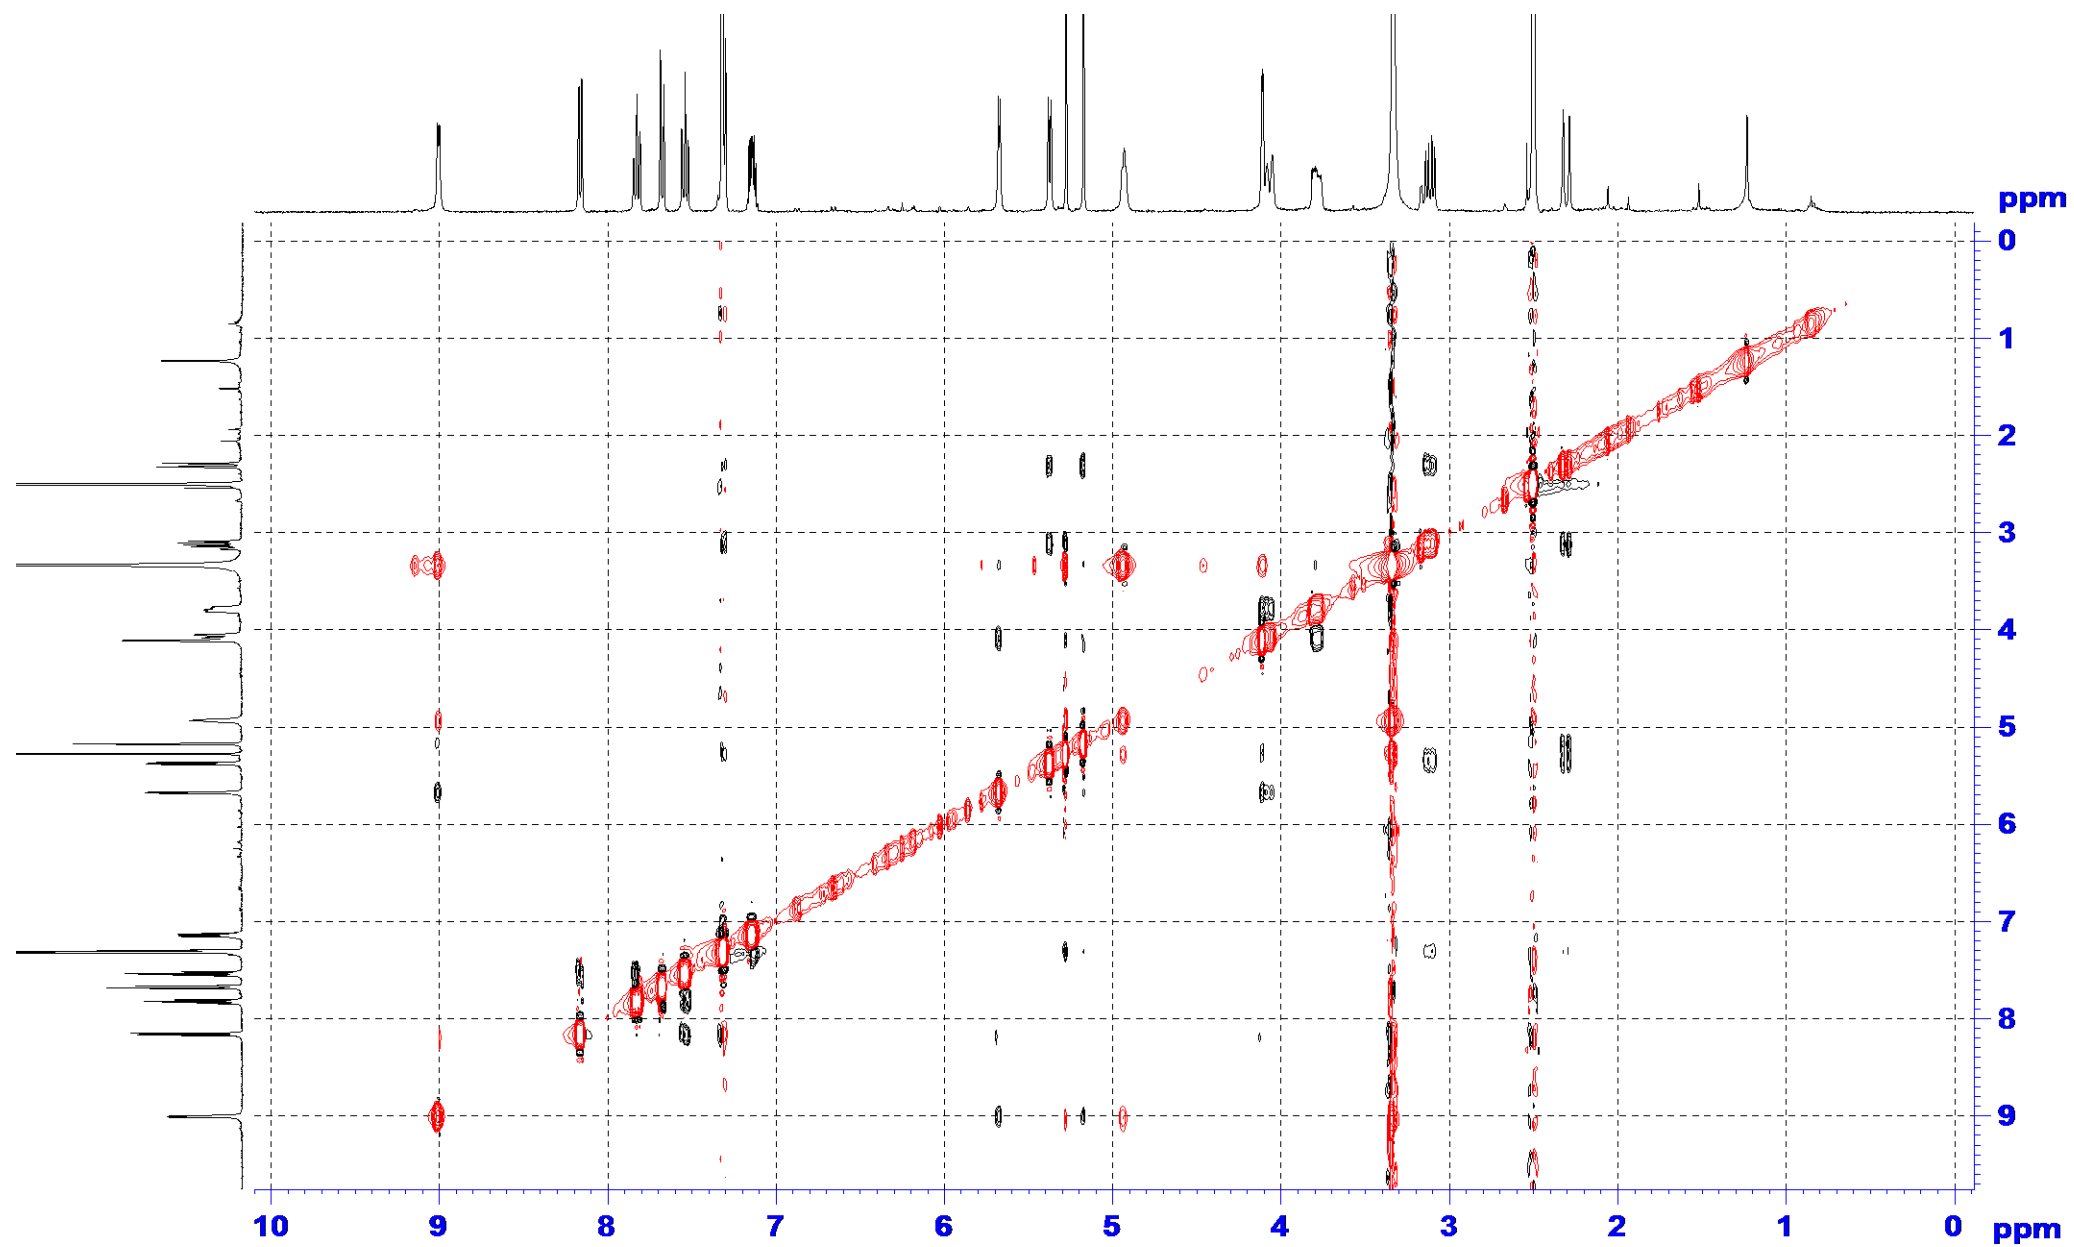

Figure S18

HRESIMS Data of 2

Xevo G2 Q-TOF/YCA166#

LZD-14-1-52 12 (0.233) Cm (11:16-(2:6+21:39))

08-Sep-2016

Waters

1: TOF MS ES+  
3.58e5

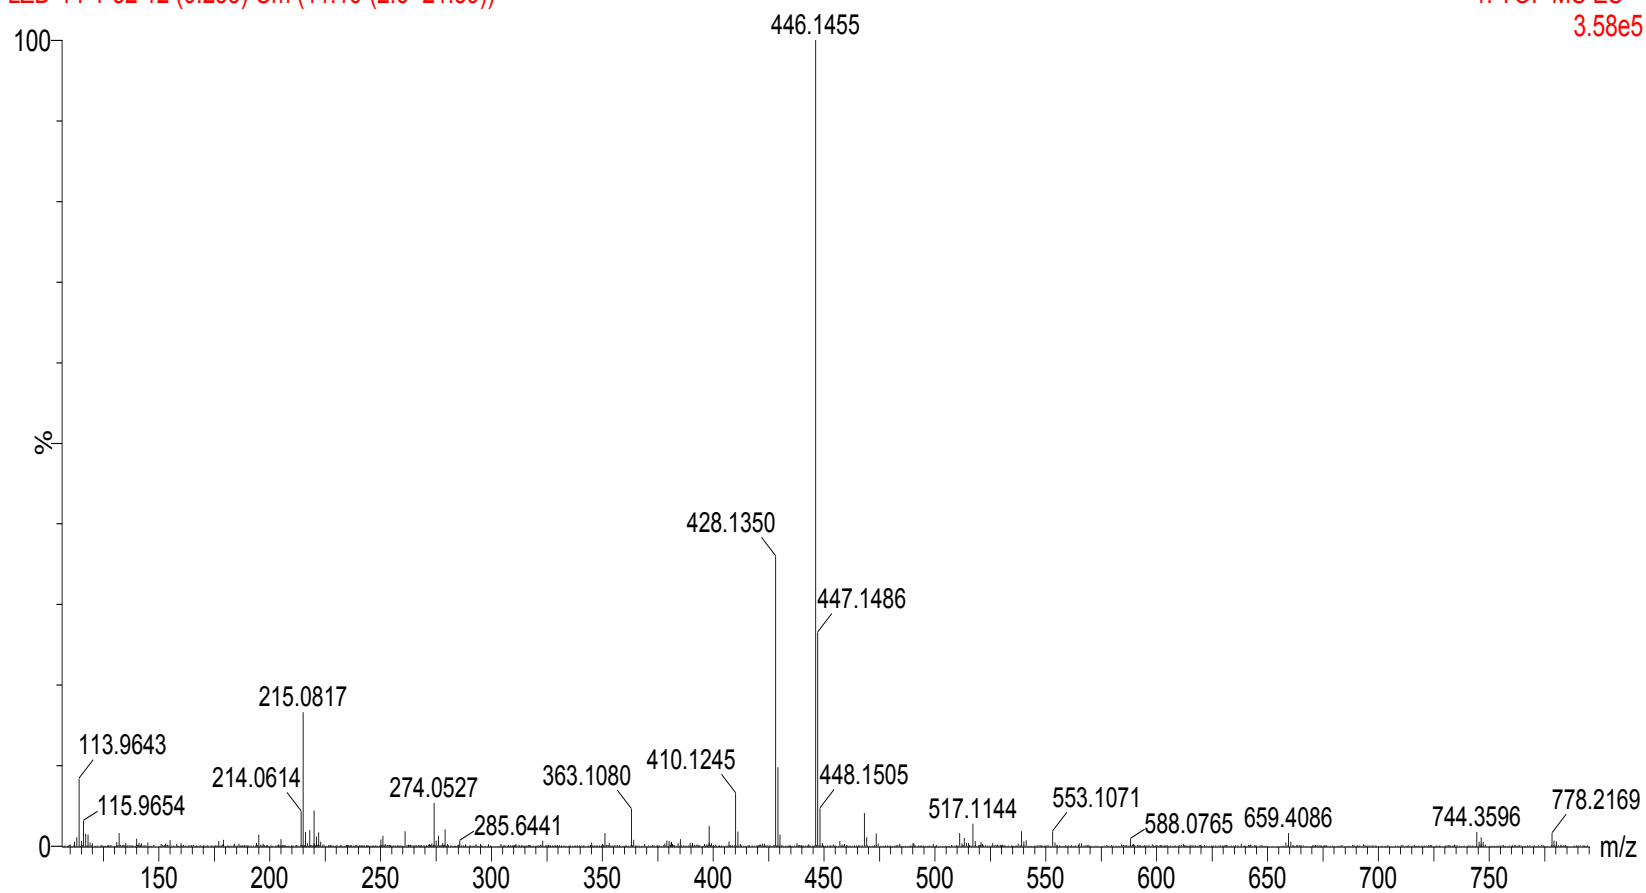

**Figure S19** UV spectrum of **3**

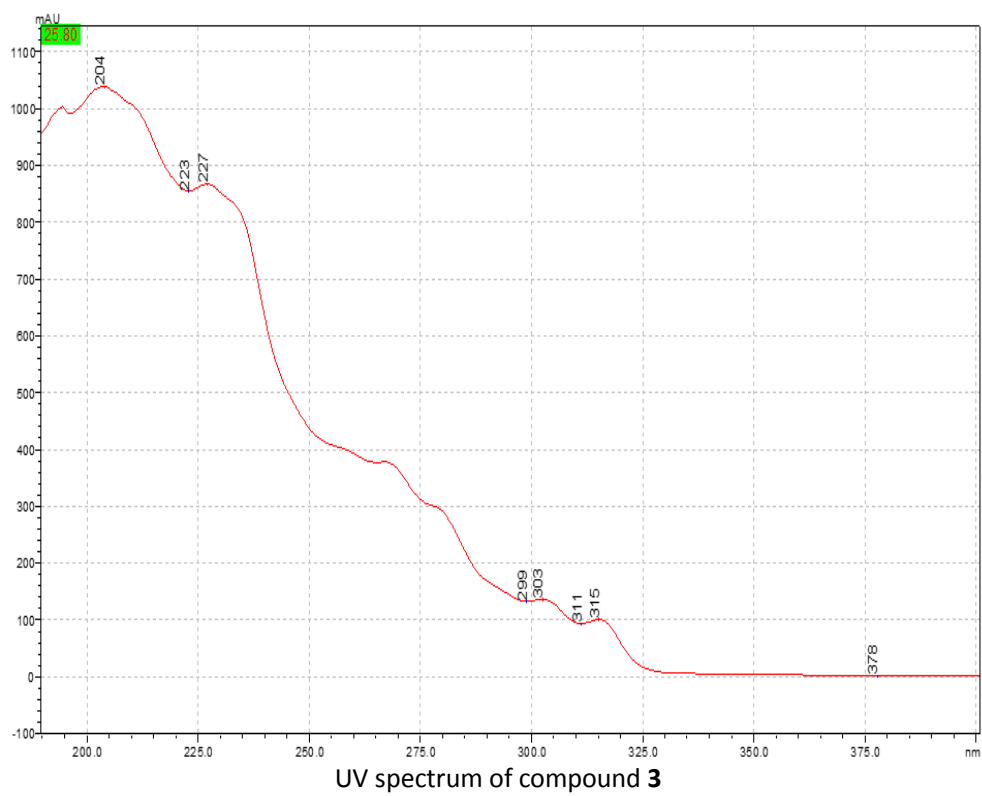

Figure S20 IR Spectrum of 3

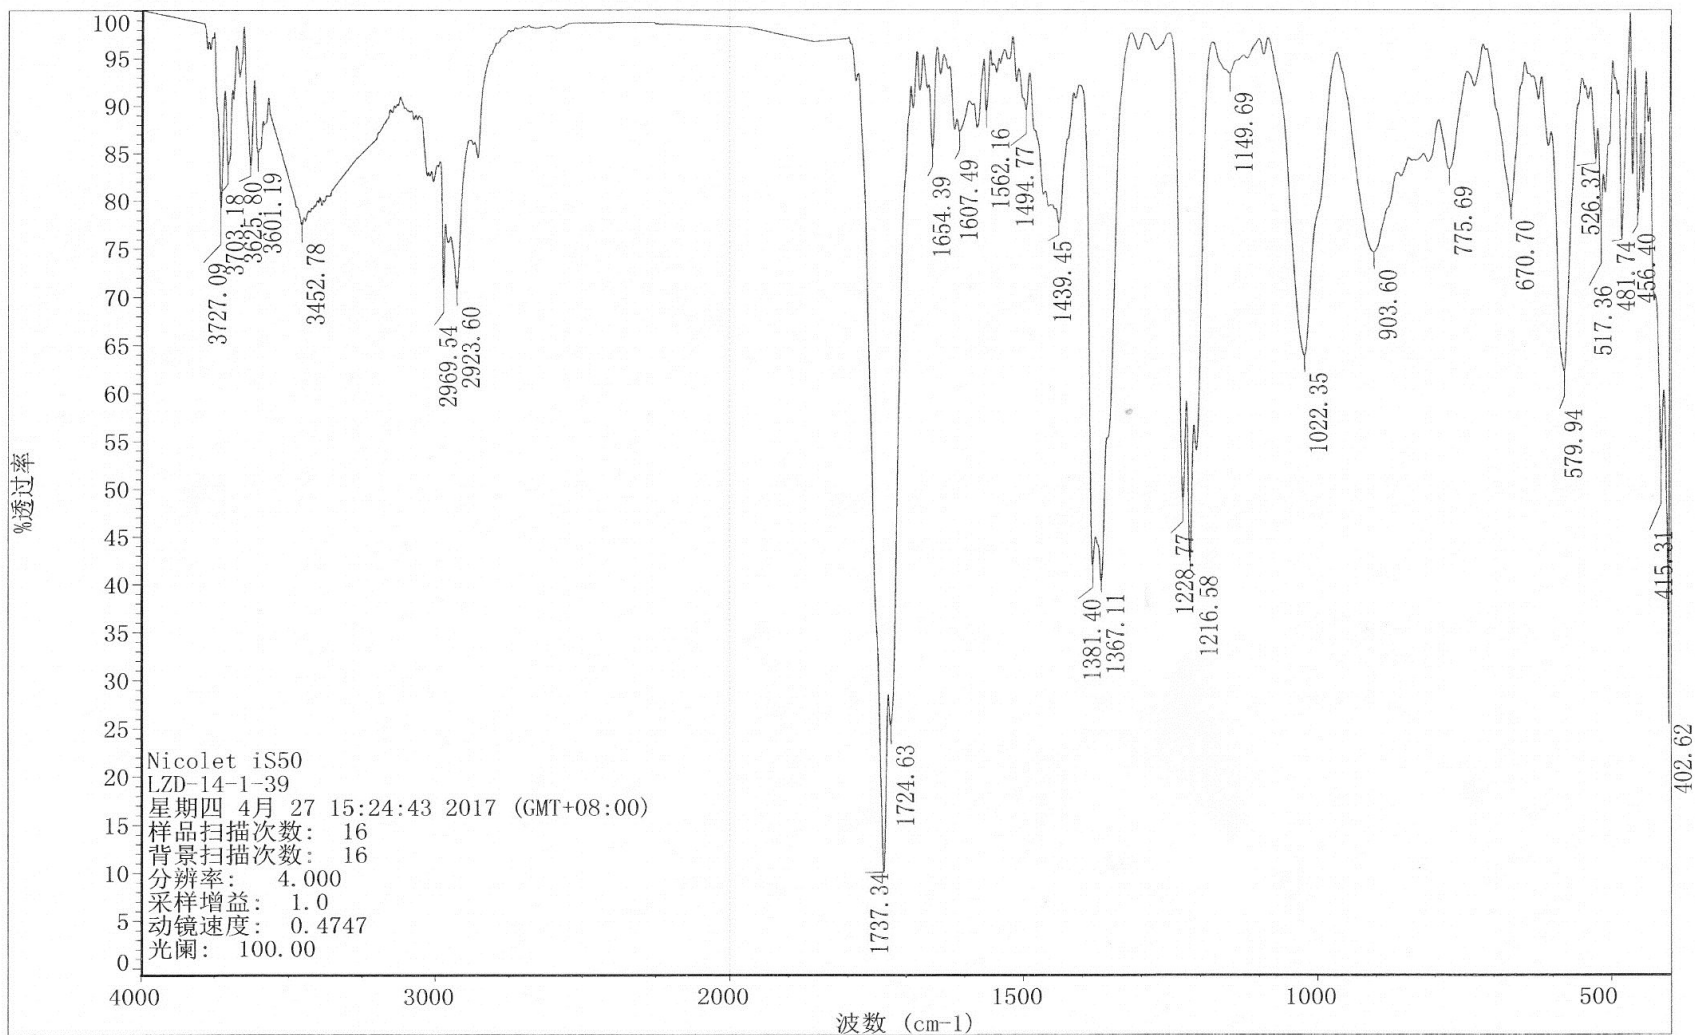

Figure S21  $^1\text{H}$  NMR Spectrum of **3** in  $\text{DMSO-}d_6$

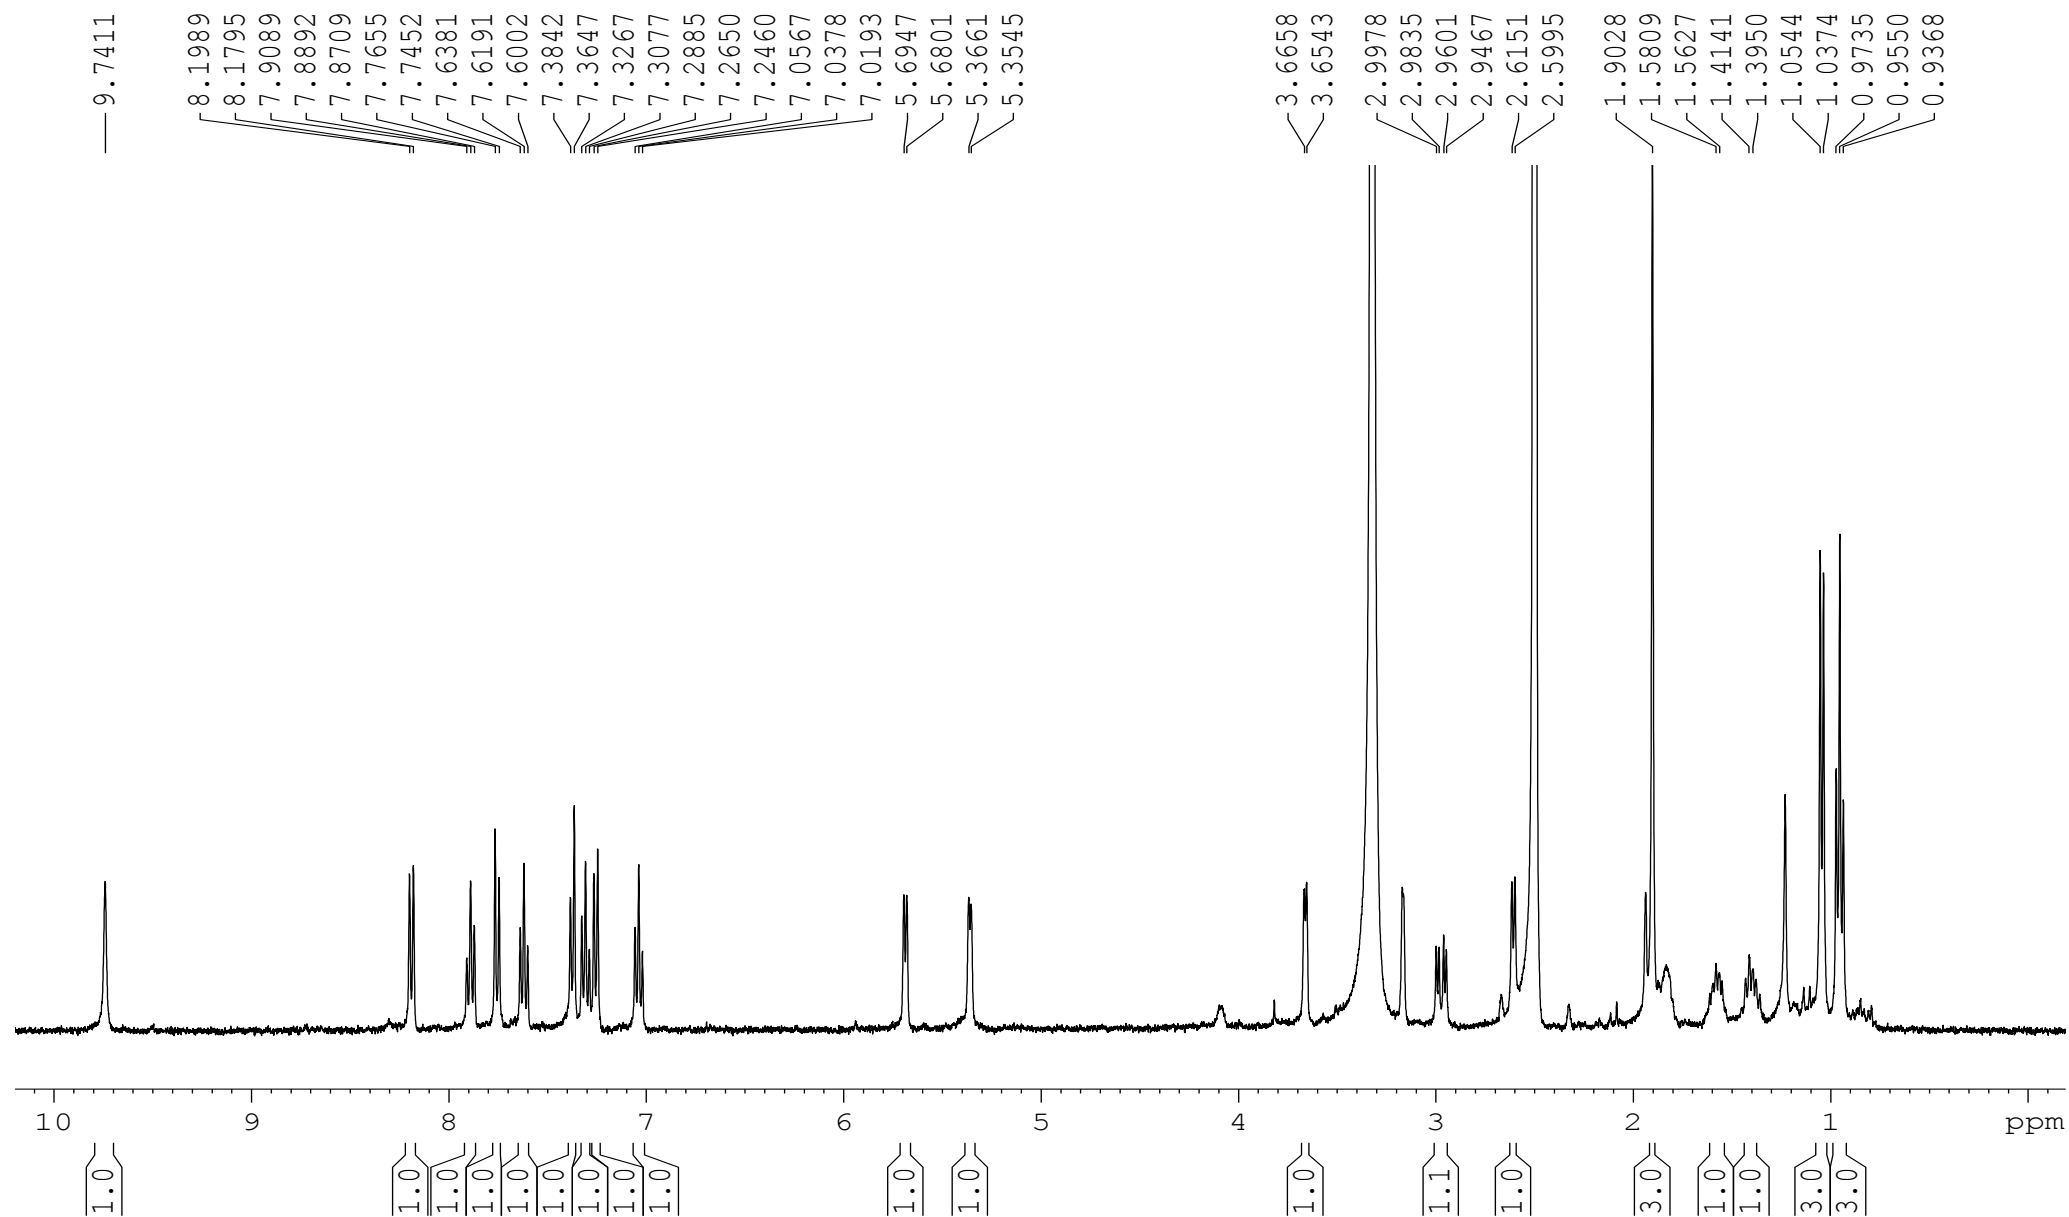

**Figure S22** DEPTQ Spectrum of **3** in DMSO-*d*<sub>6</sub>

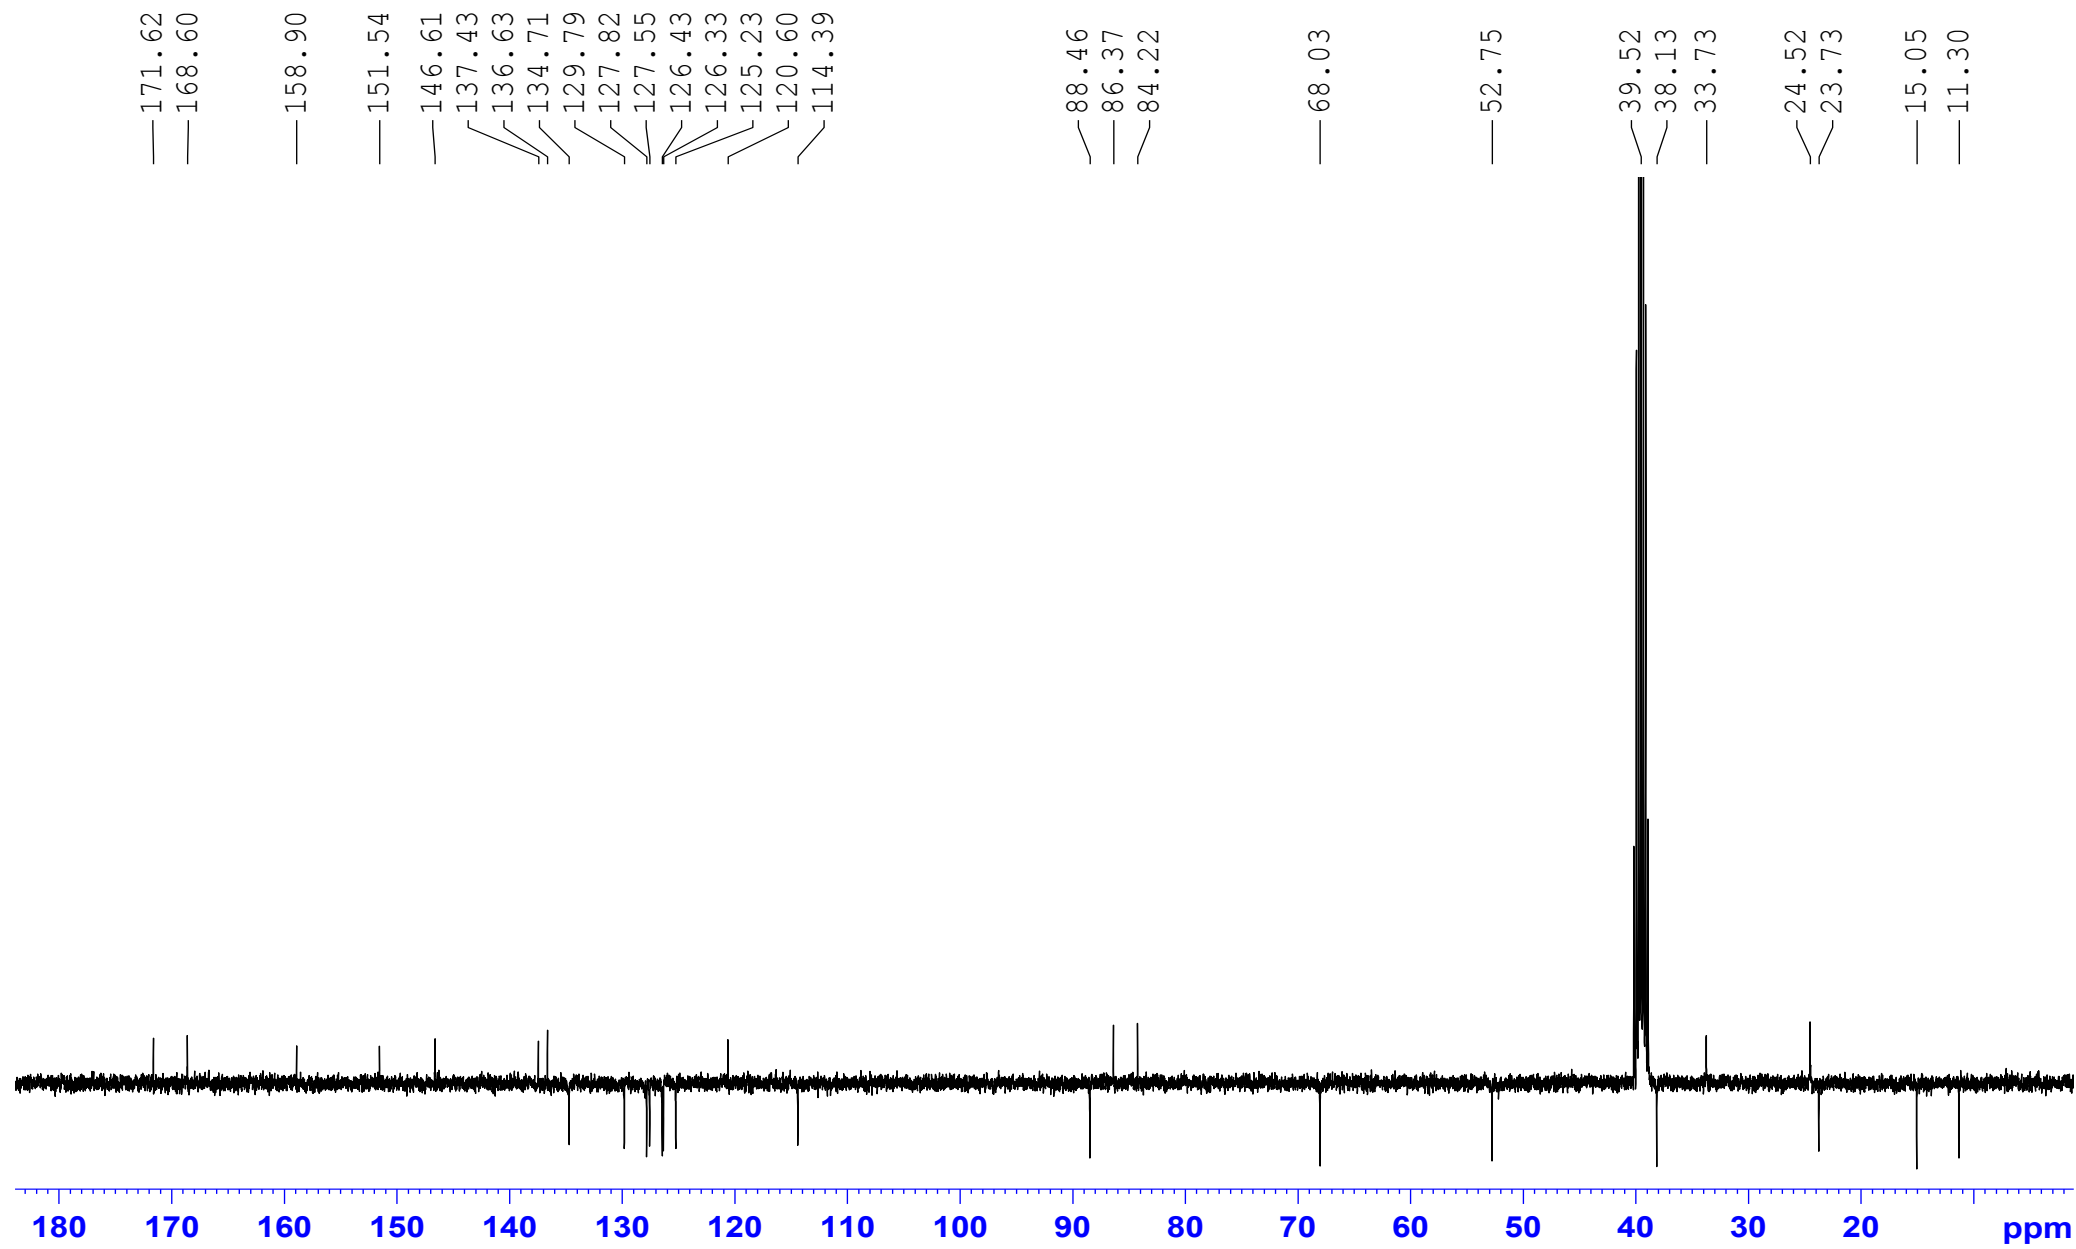



Figure S23 HSQC Spectrum of 3 in DMSO- $d_6$

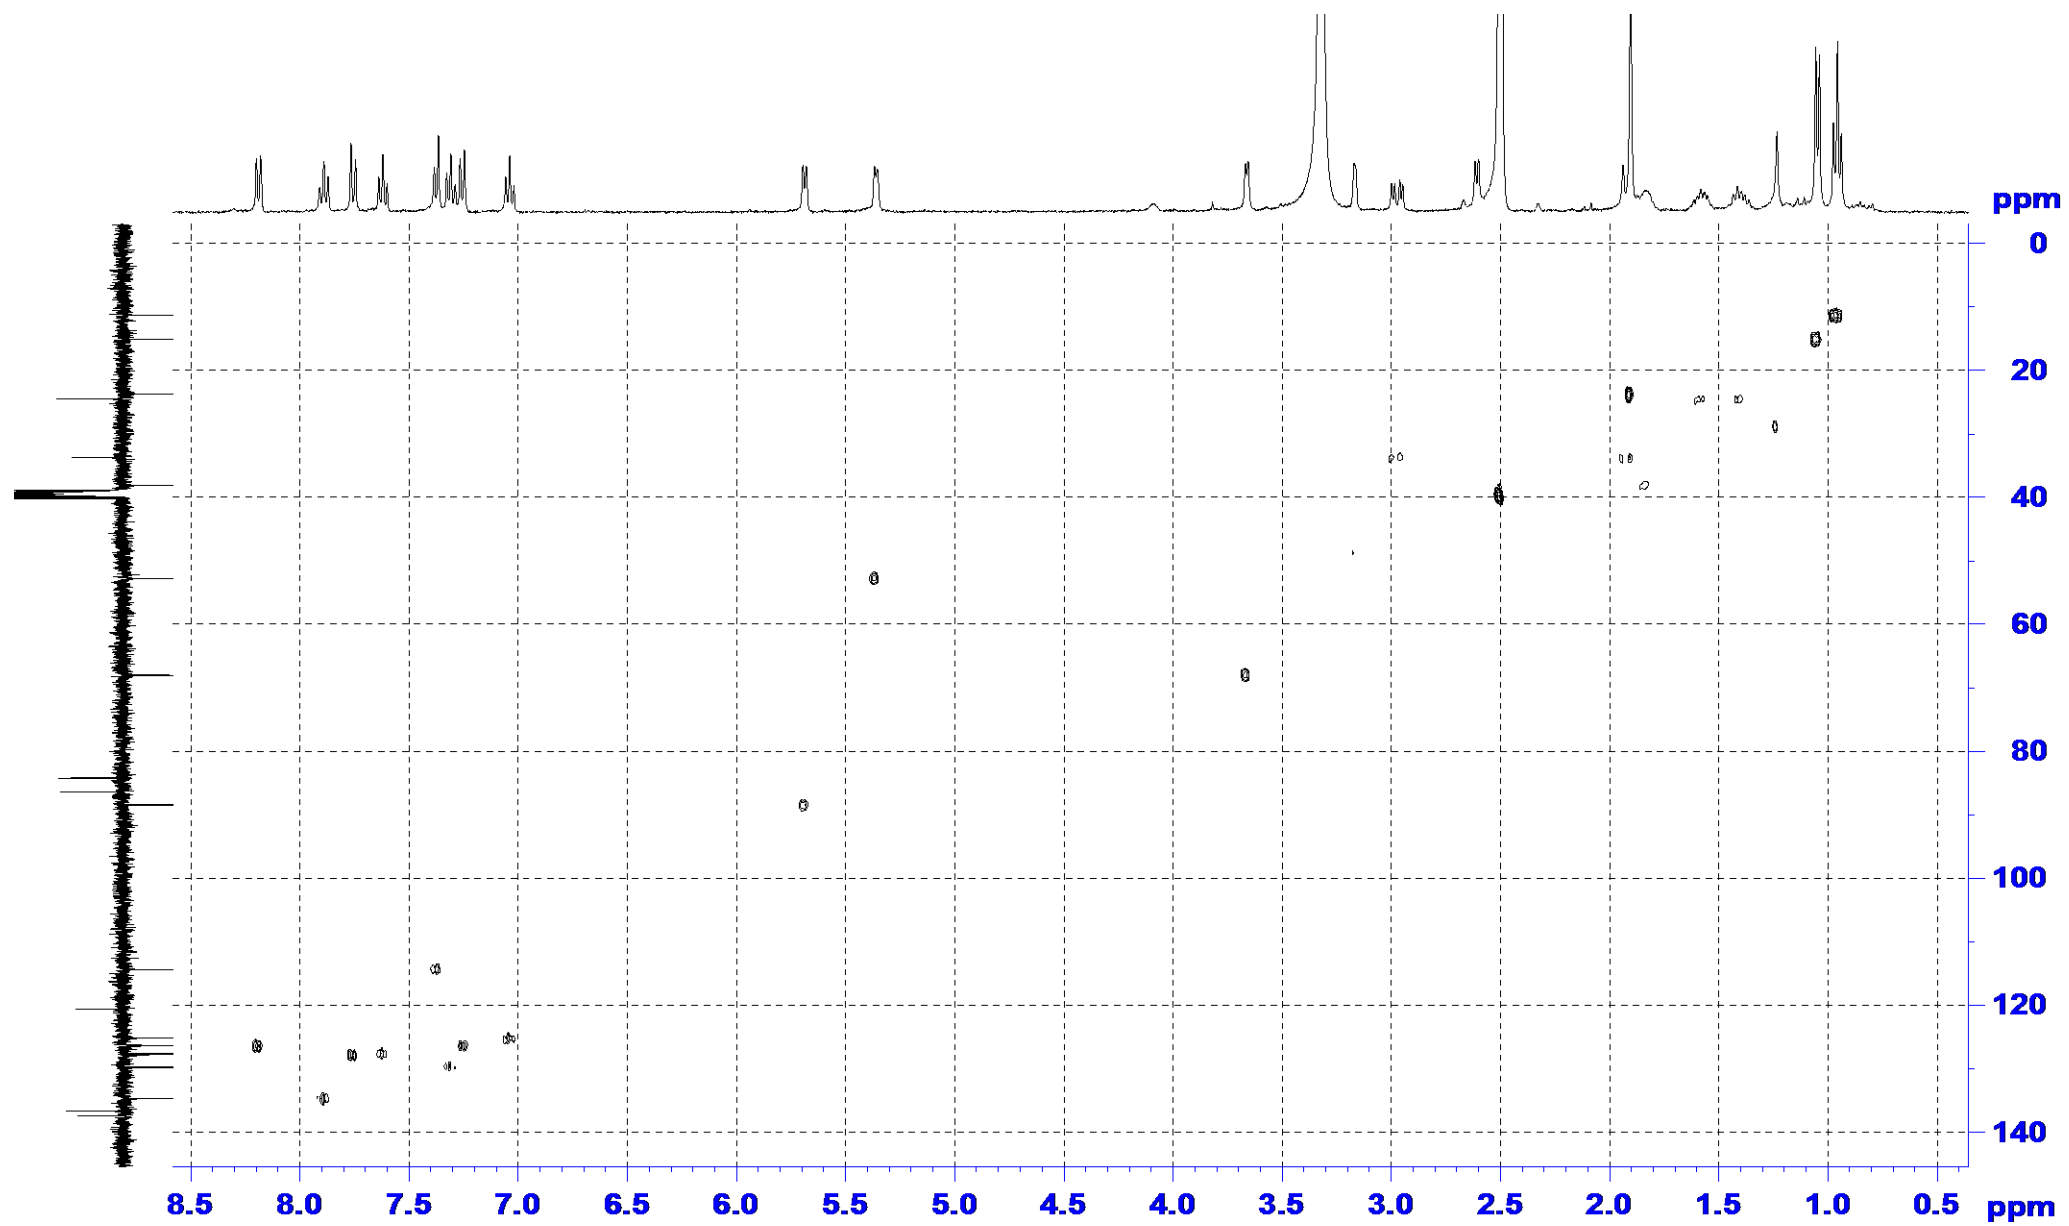

Figure S24  $^1\text{H}$ - $^1\text{H}$  COSY Spectrum of **3** in  $\text{DMSO-}d_6$

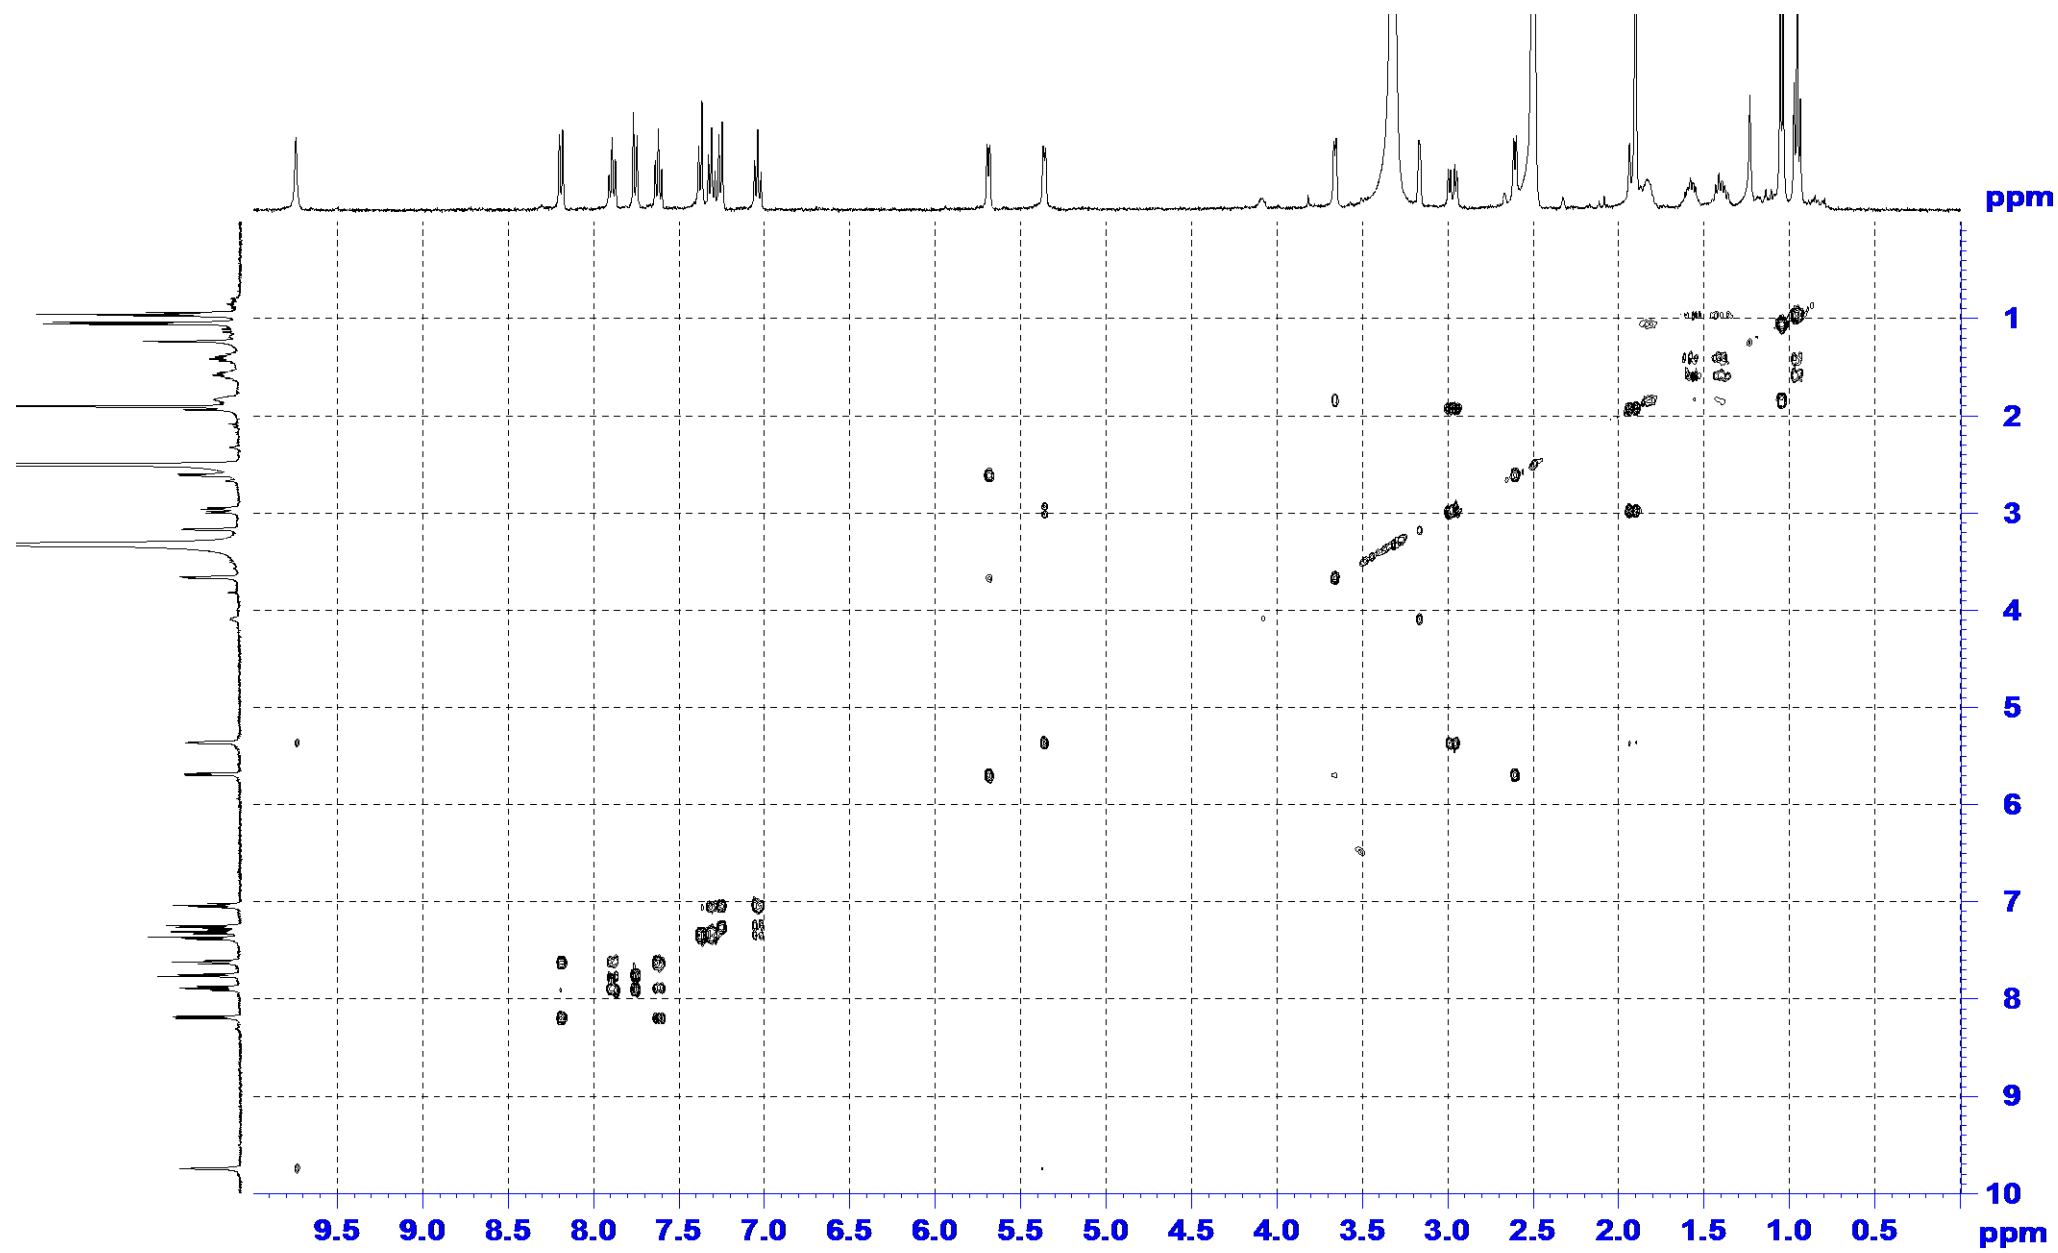

Figure S25 HMBC Spectrum of 3 in DMSO-*d*<sub>6</sub>

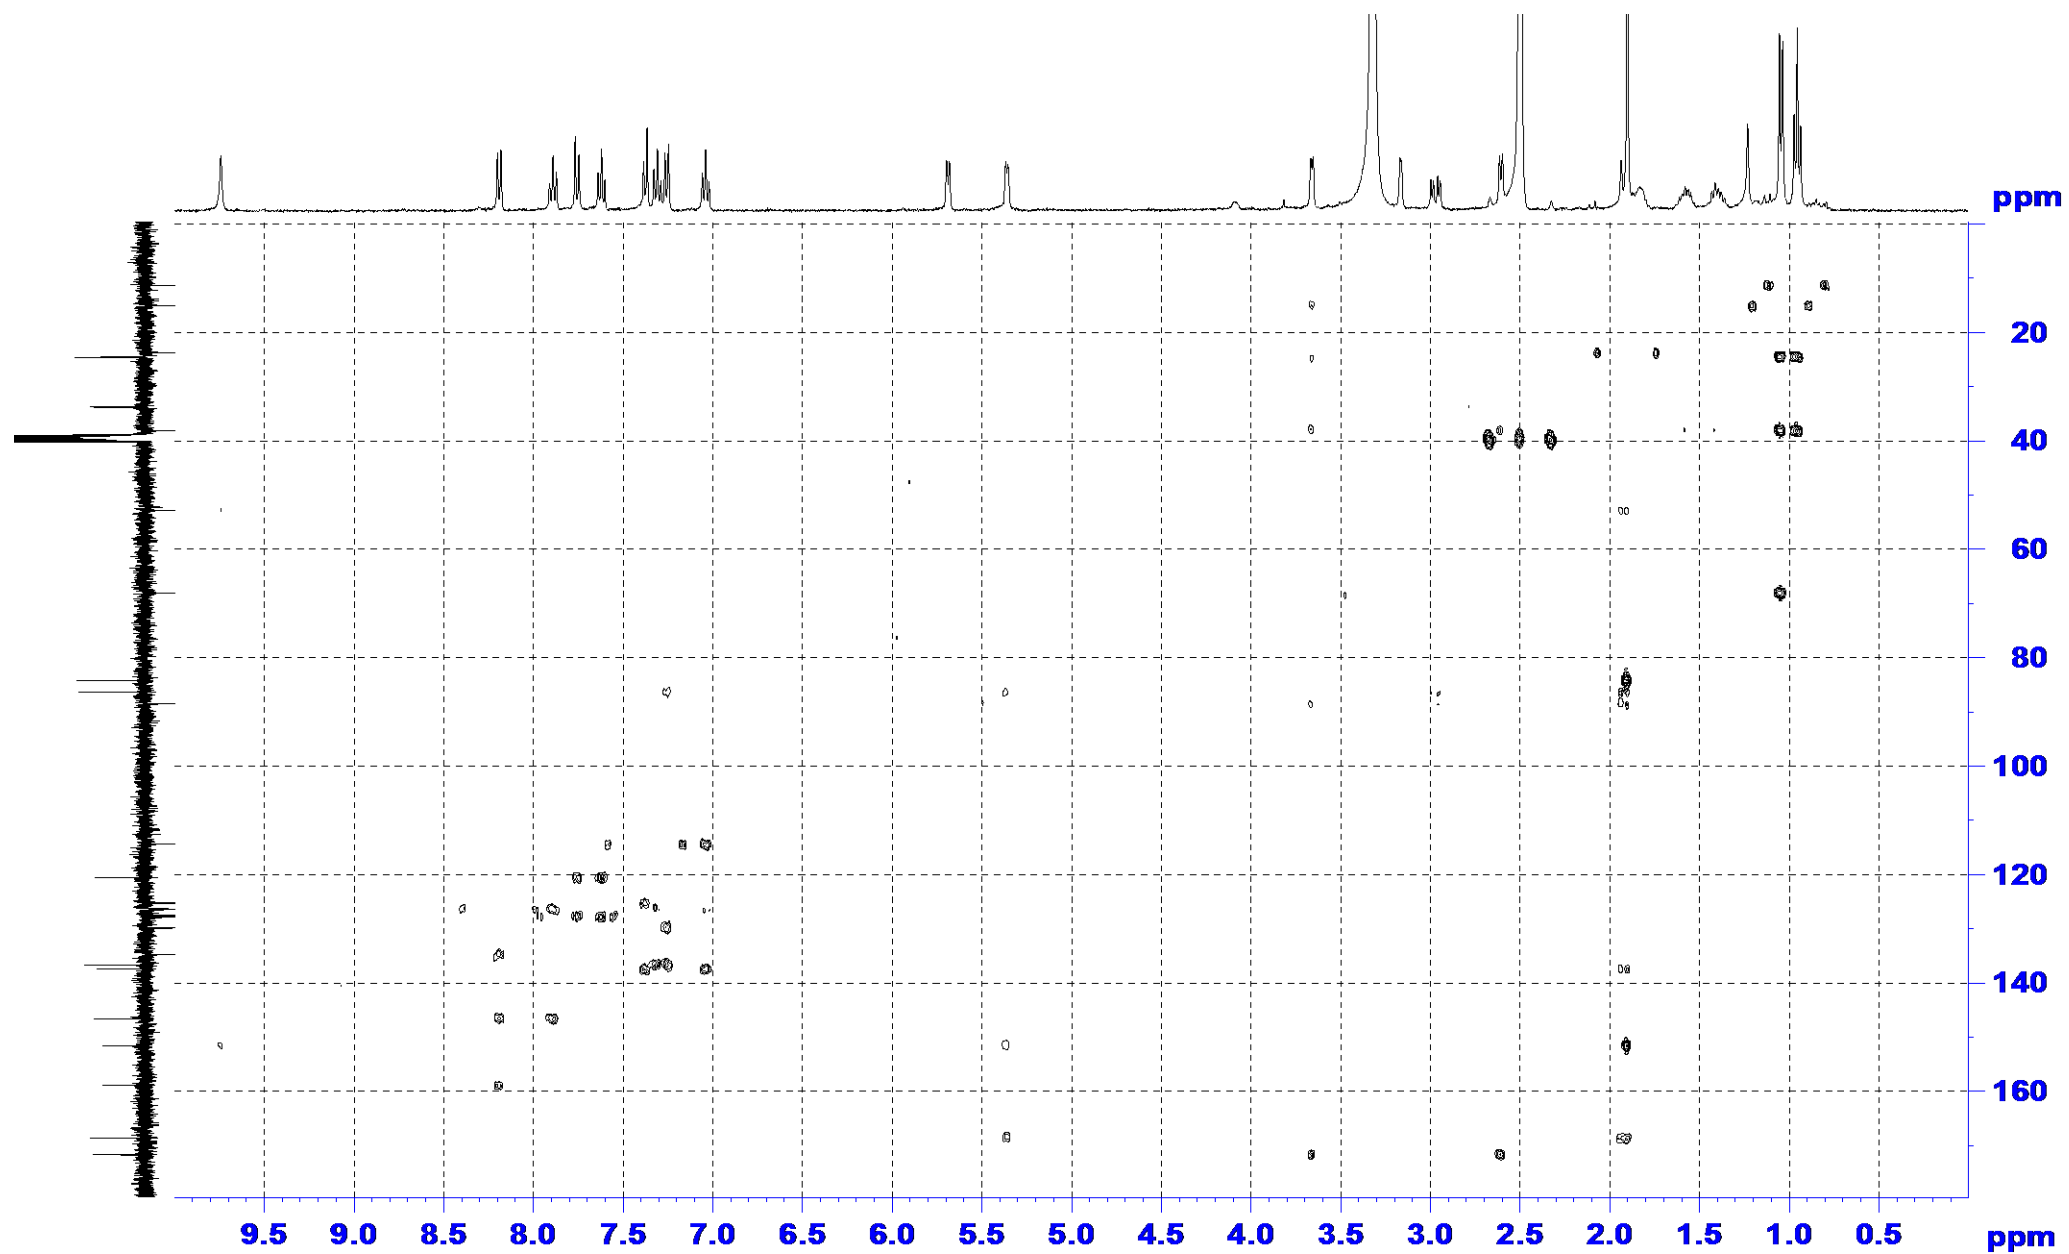

Figure S26 NOESY Spectrum of **3** in DMSO- $d_6$

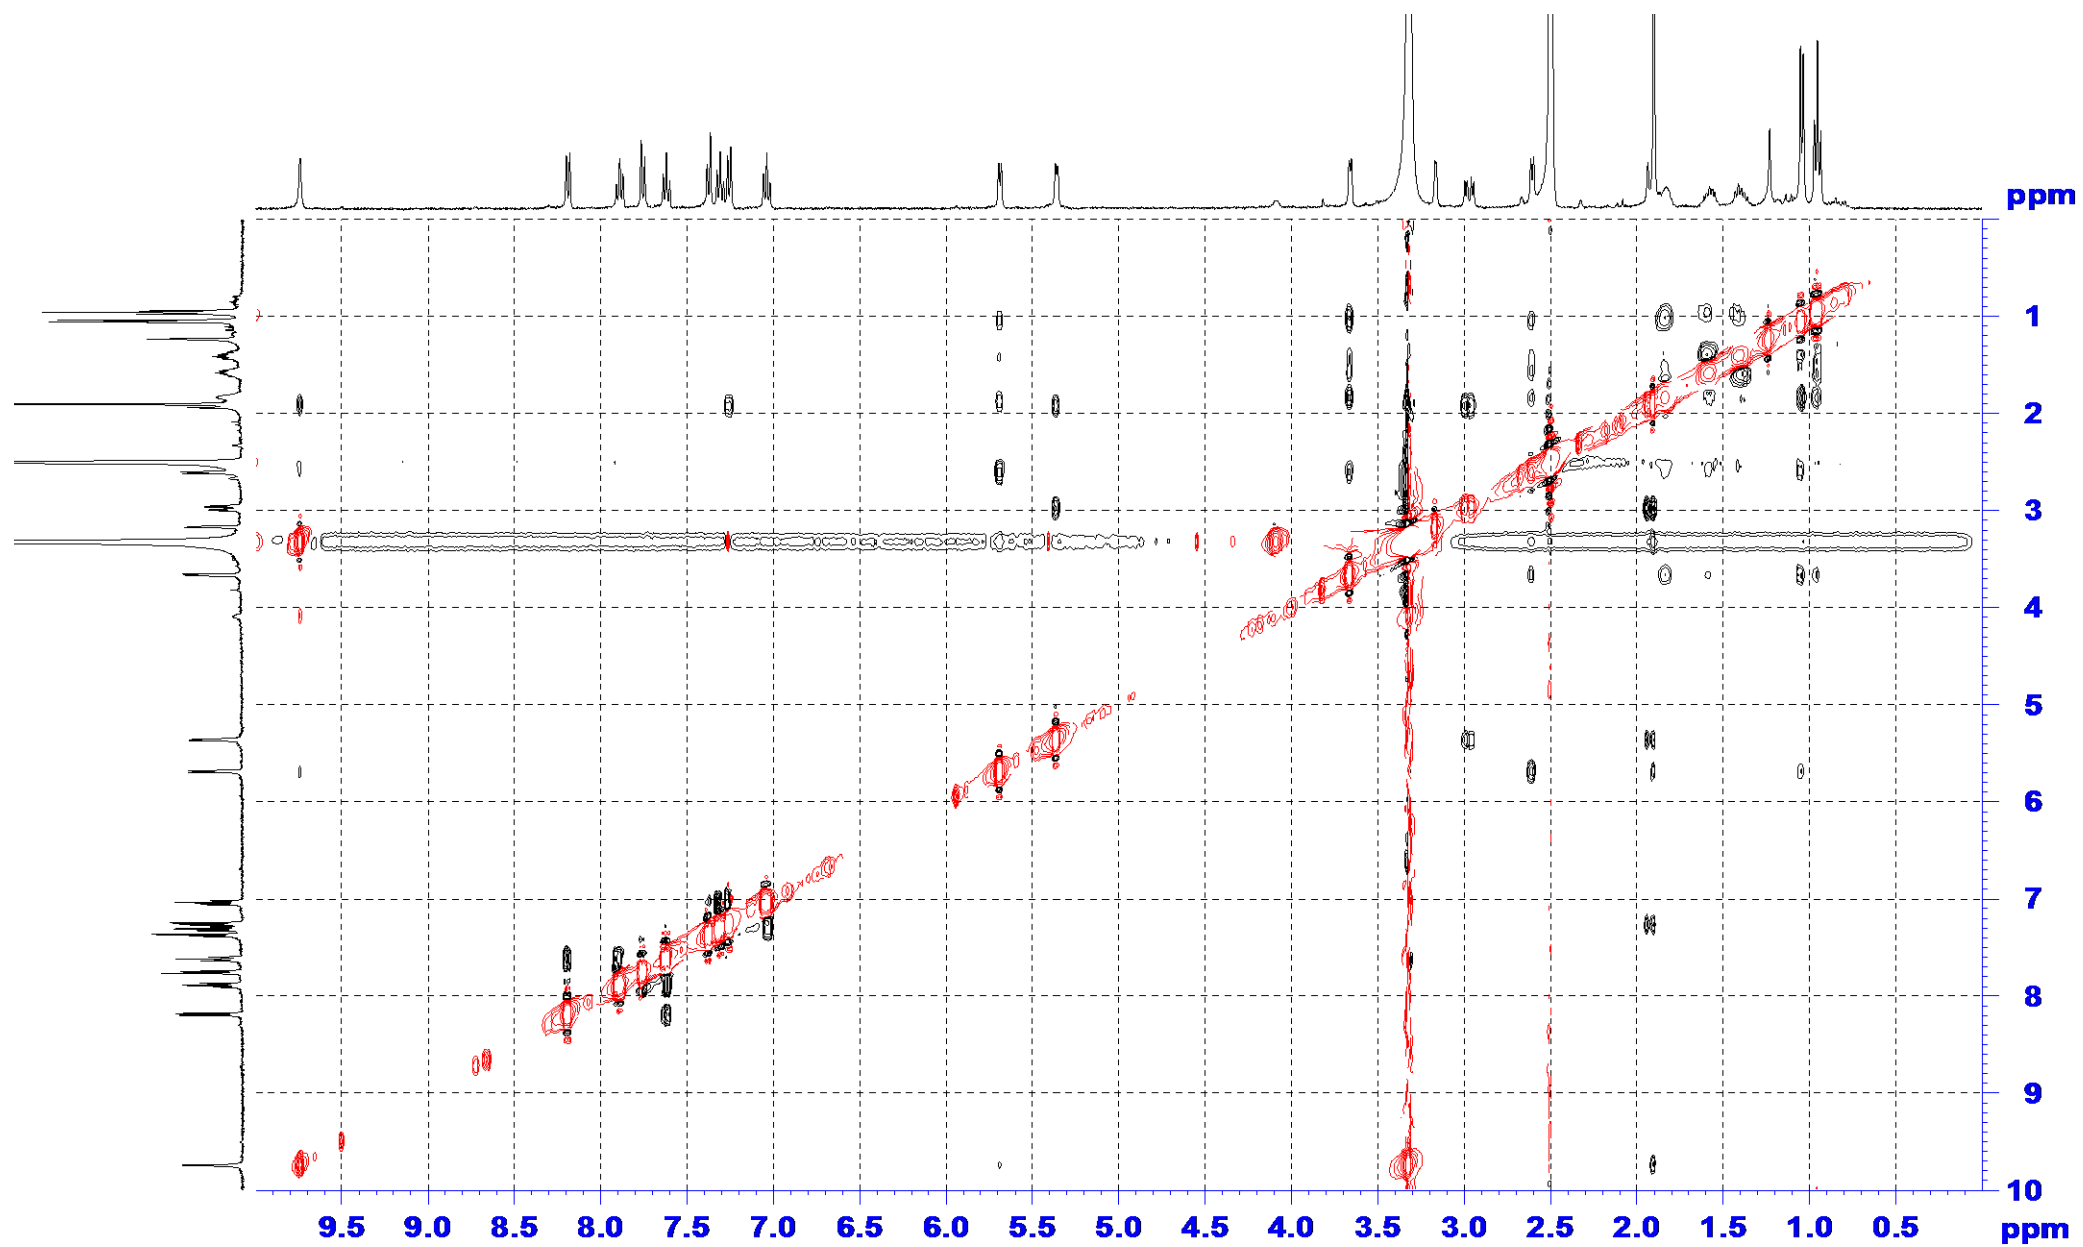

Figure S27

HRESIMS Data of 3

Xevo G2 Q-TOF/YCA166#  
LZD-14-1-40 10 (0.199) Cm (10:16-(2:8+21:54))

11-Jan-2017

Waters  
1: TOF MS ES+  
1.37e5

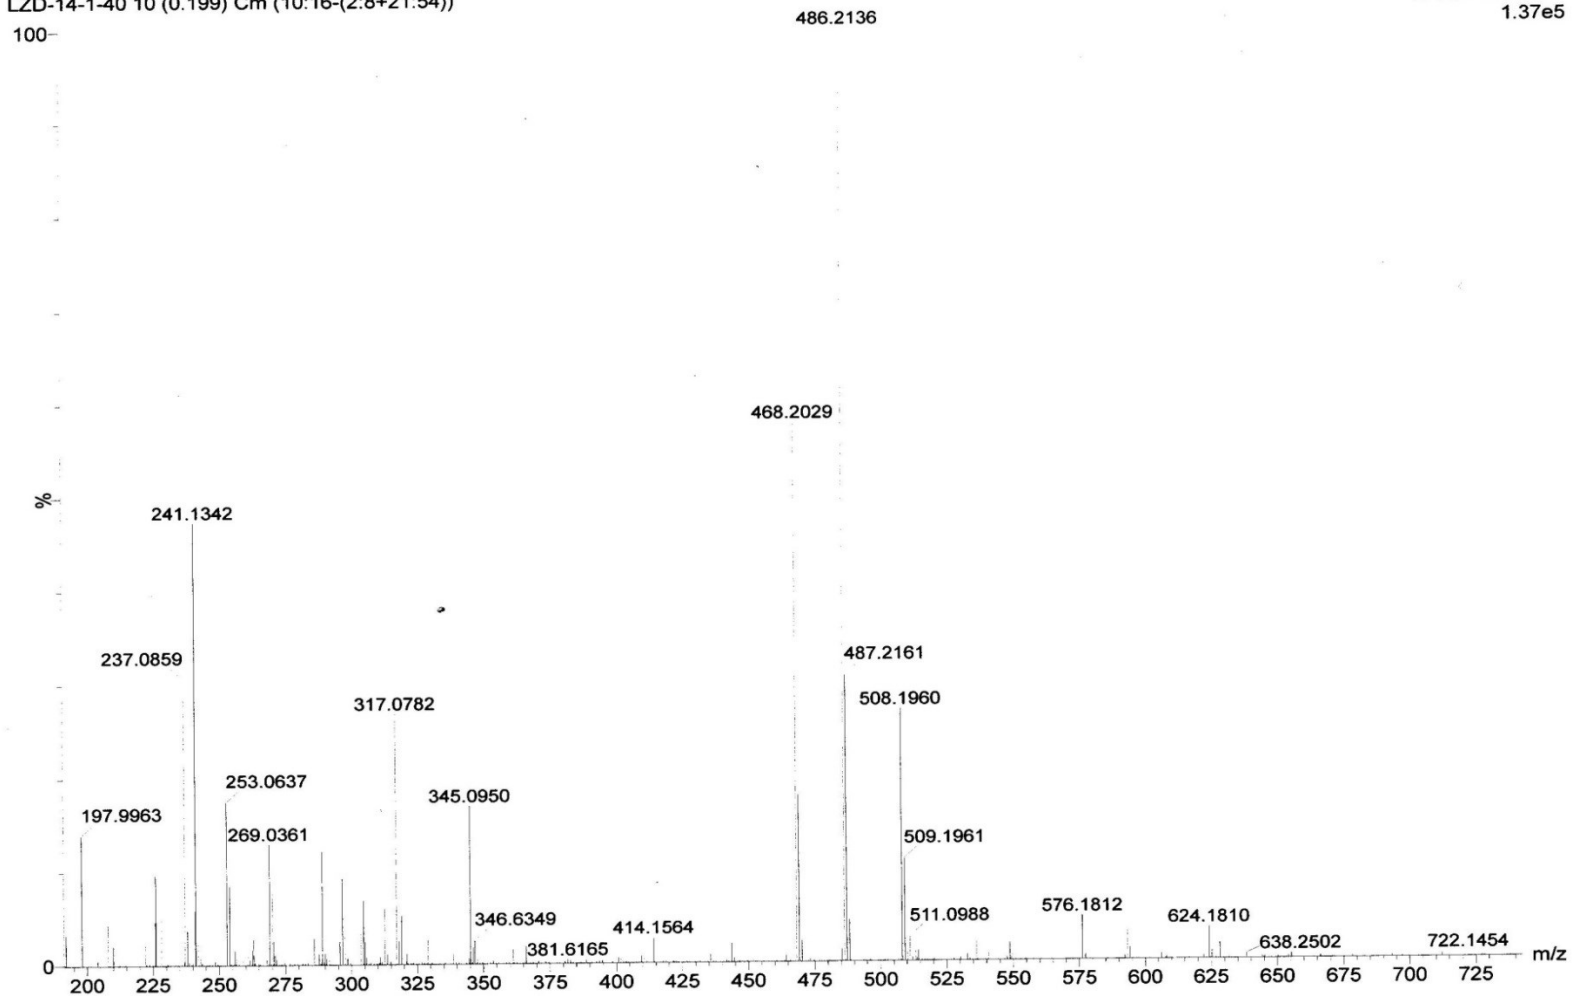

Figure S28 UV spectrum of 4

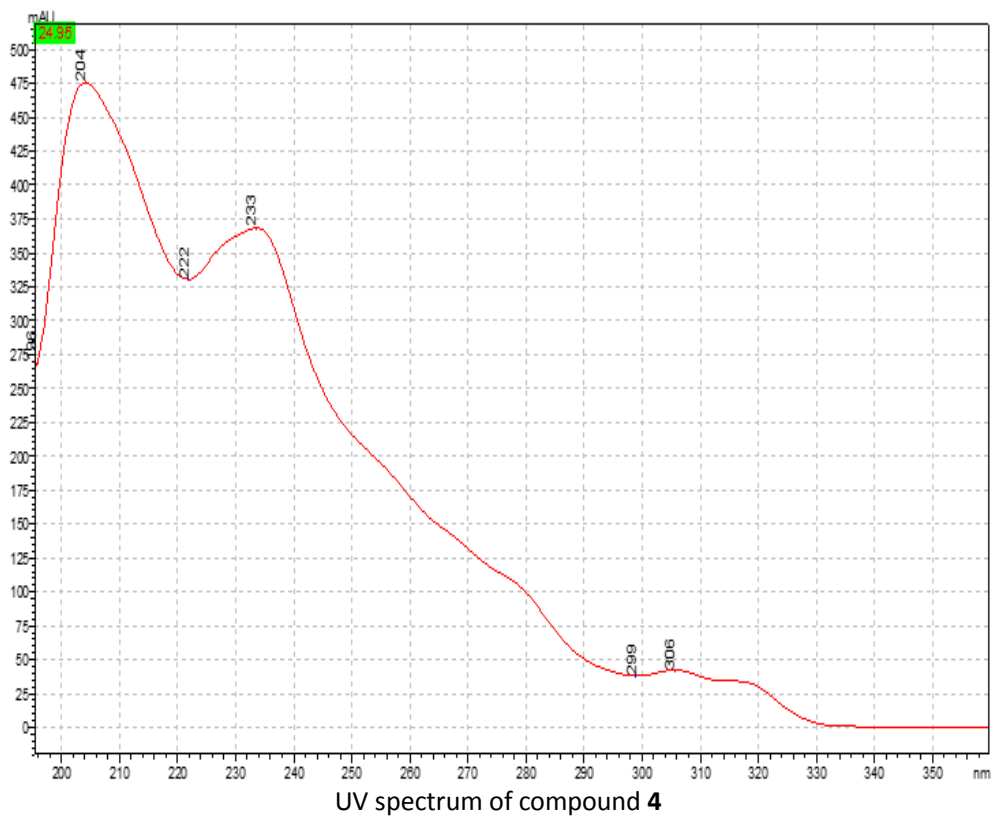

Figure S29 IR Spectrum of 4

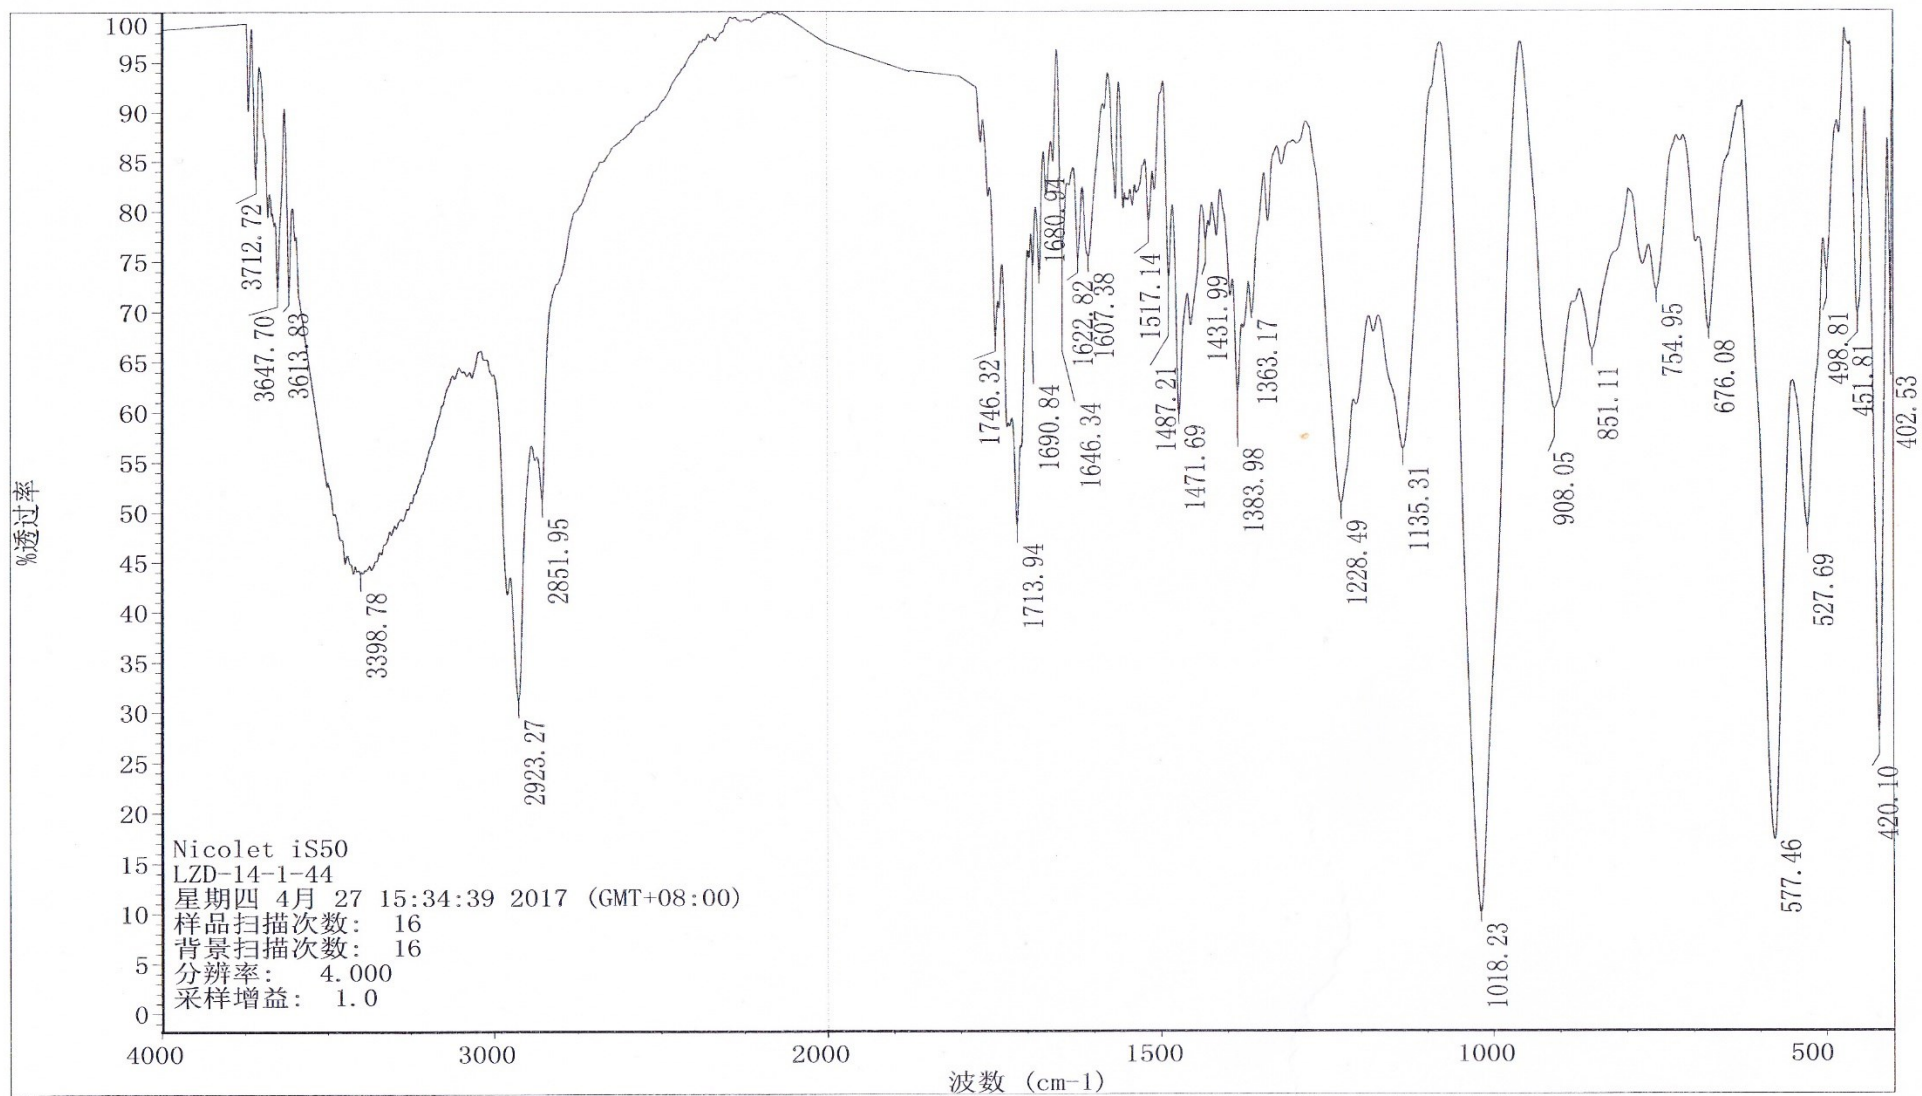

Figure S30  $^1\text{H}$  NMR Spectrum of **4** in  $\text{DMSO-}d_6$

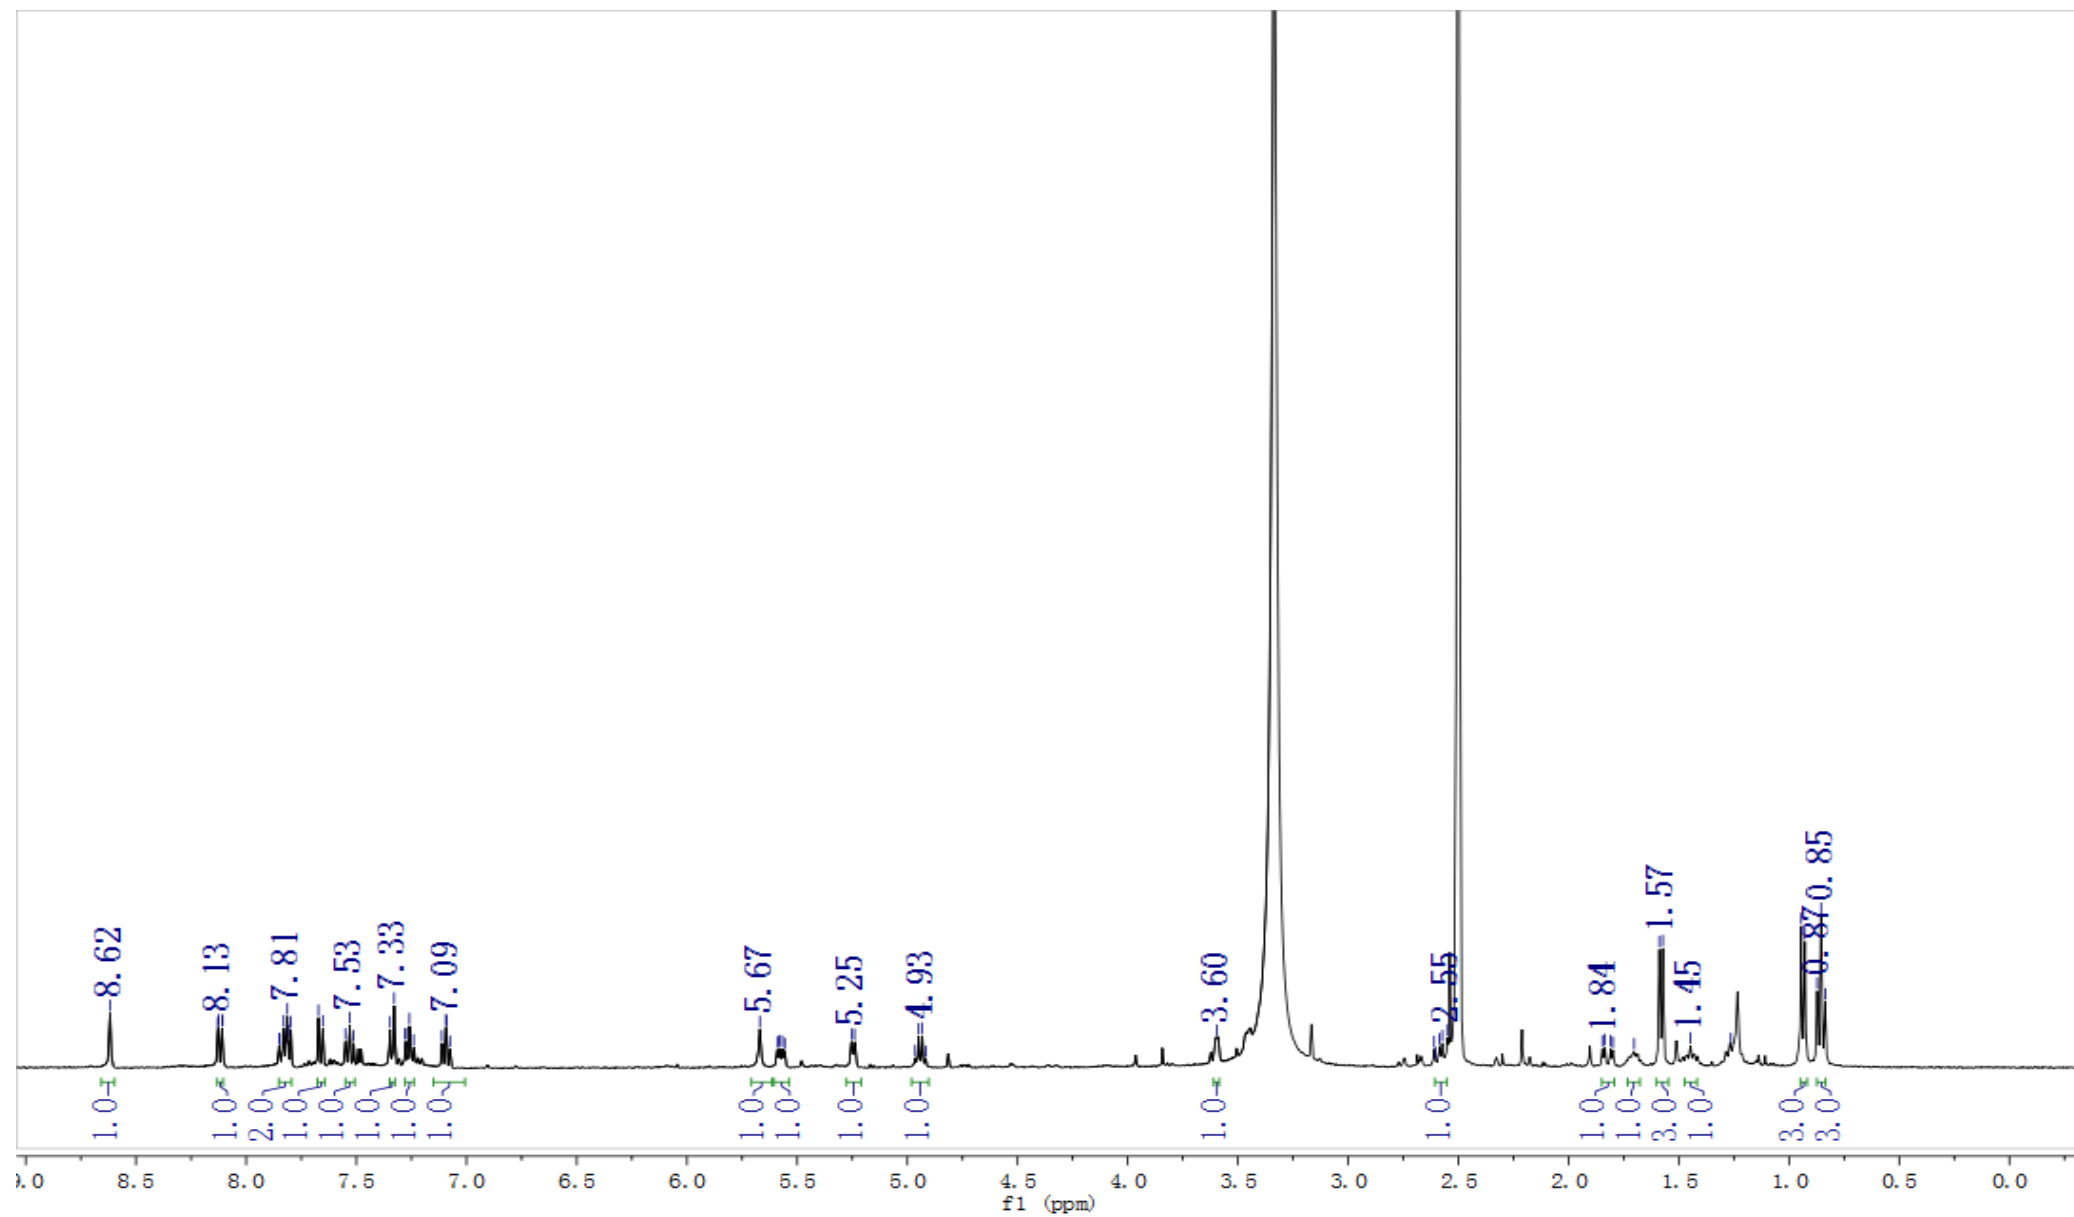



**Figure S31**  $^{13}\text{C}$  NMR Spectrum of **4** in  $\text{DMSO-}d_6$

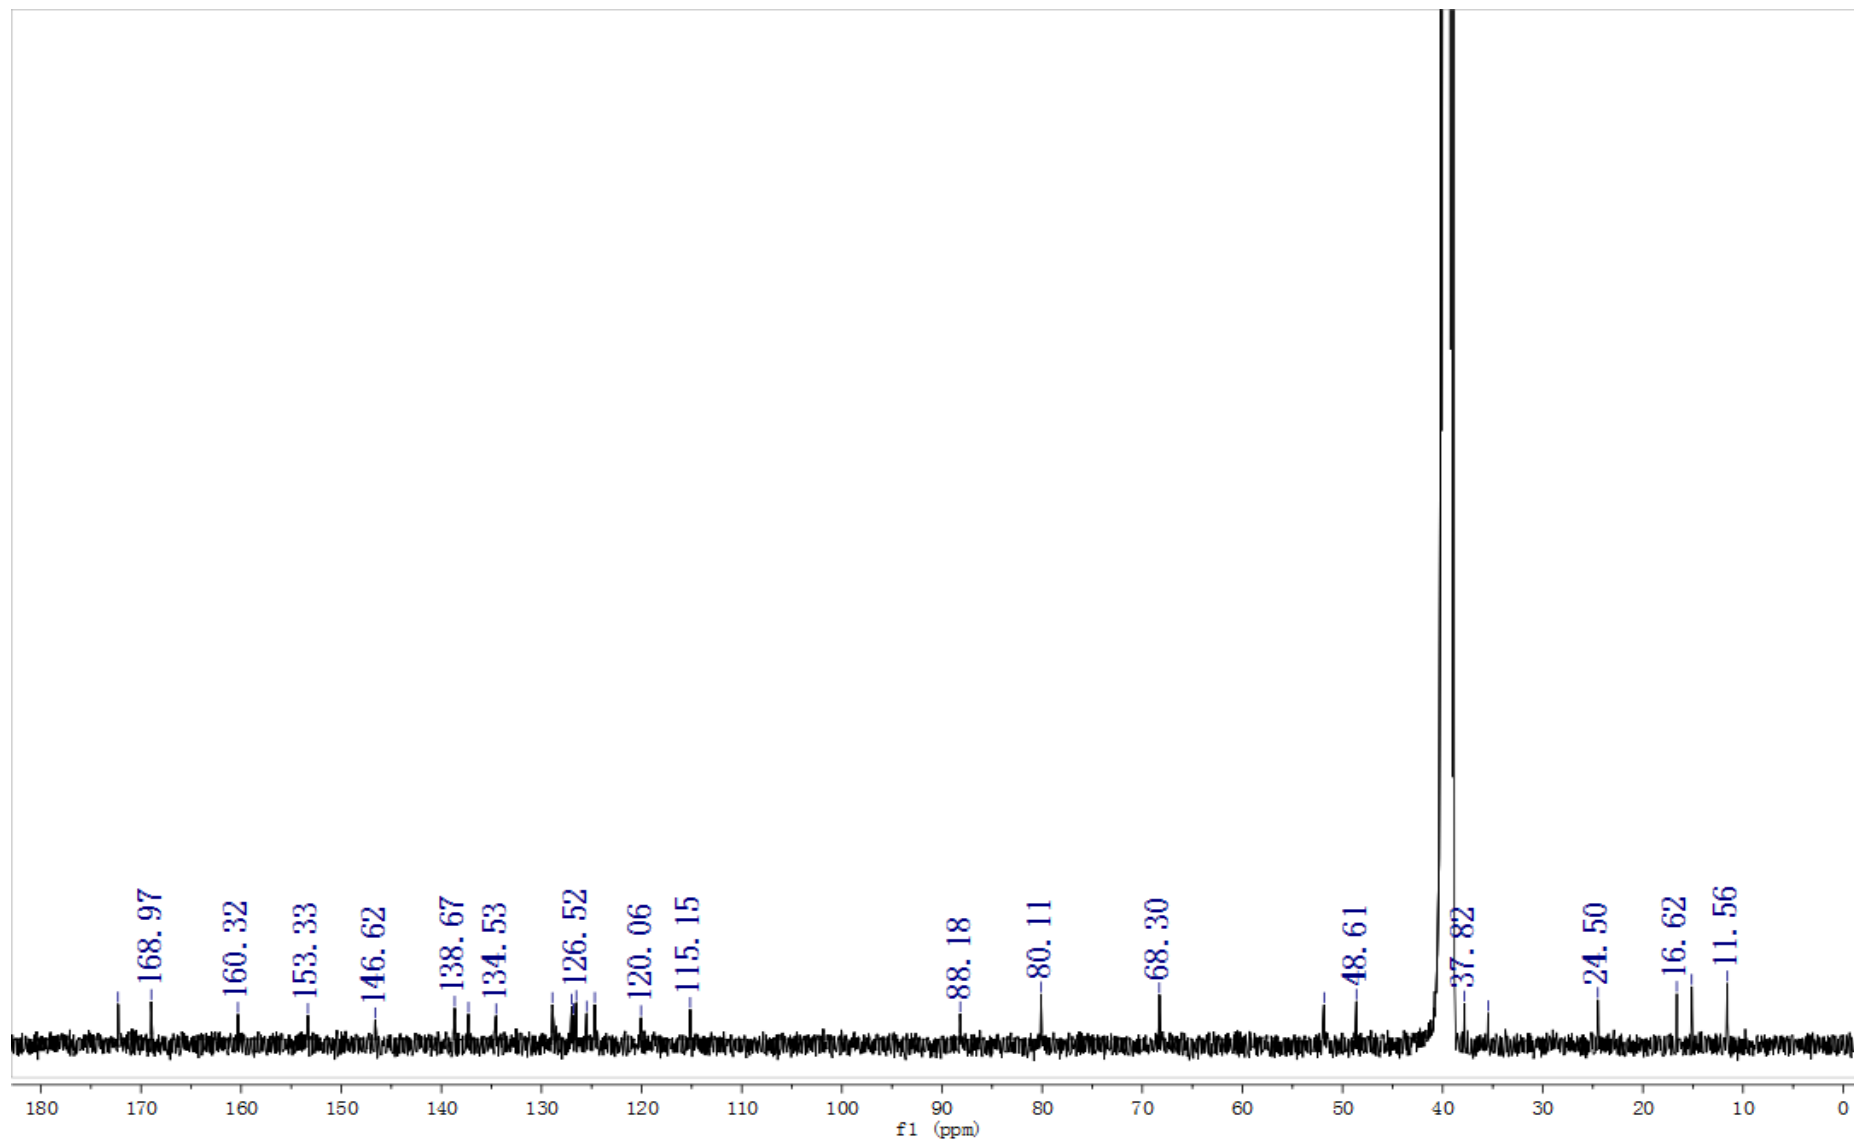

Figure S32 HSQC Spectrum of 4 in DMSO- $d_6$

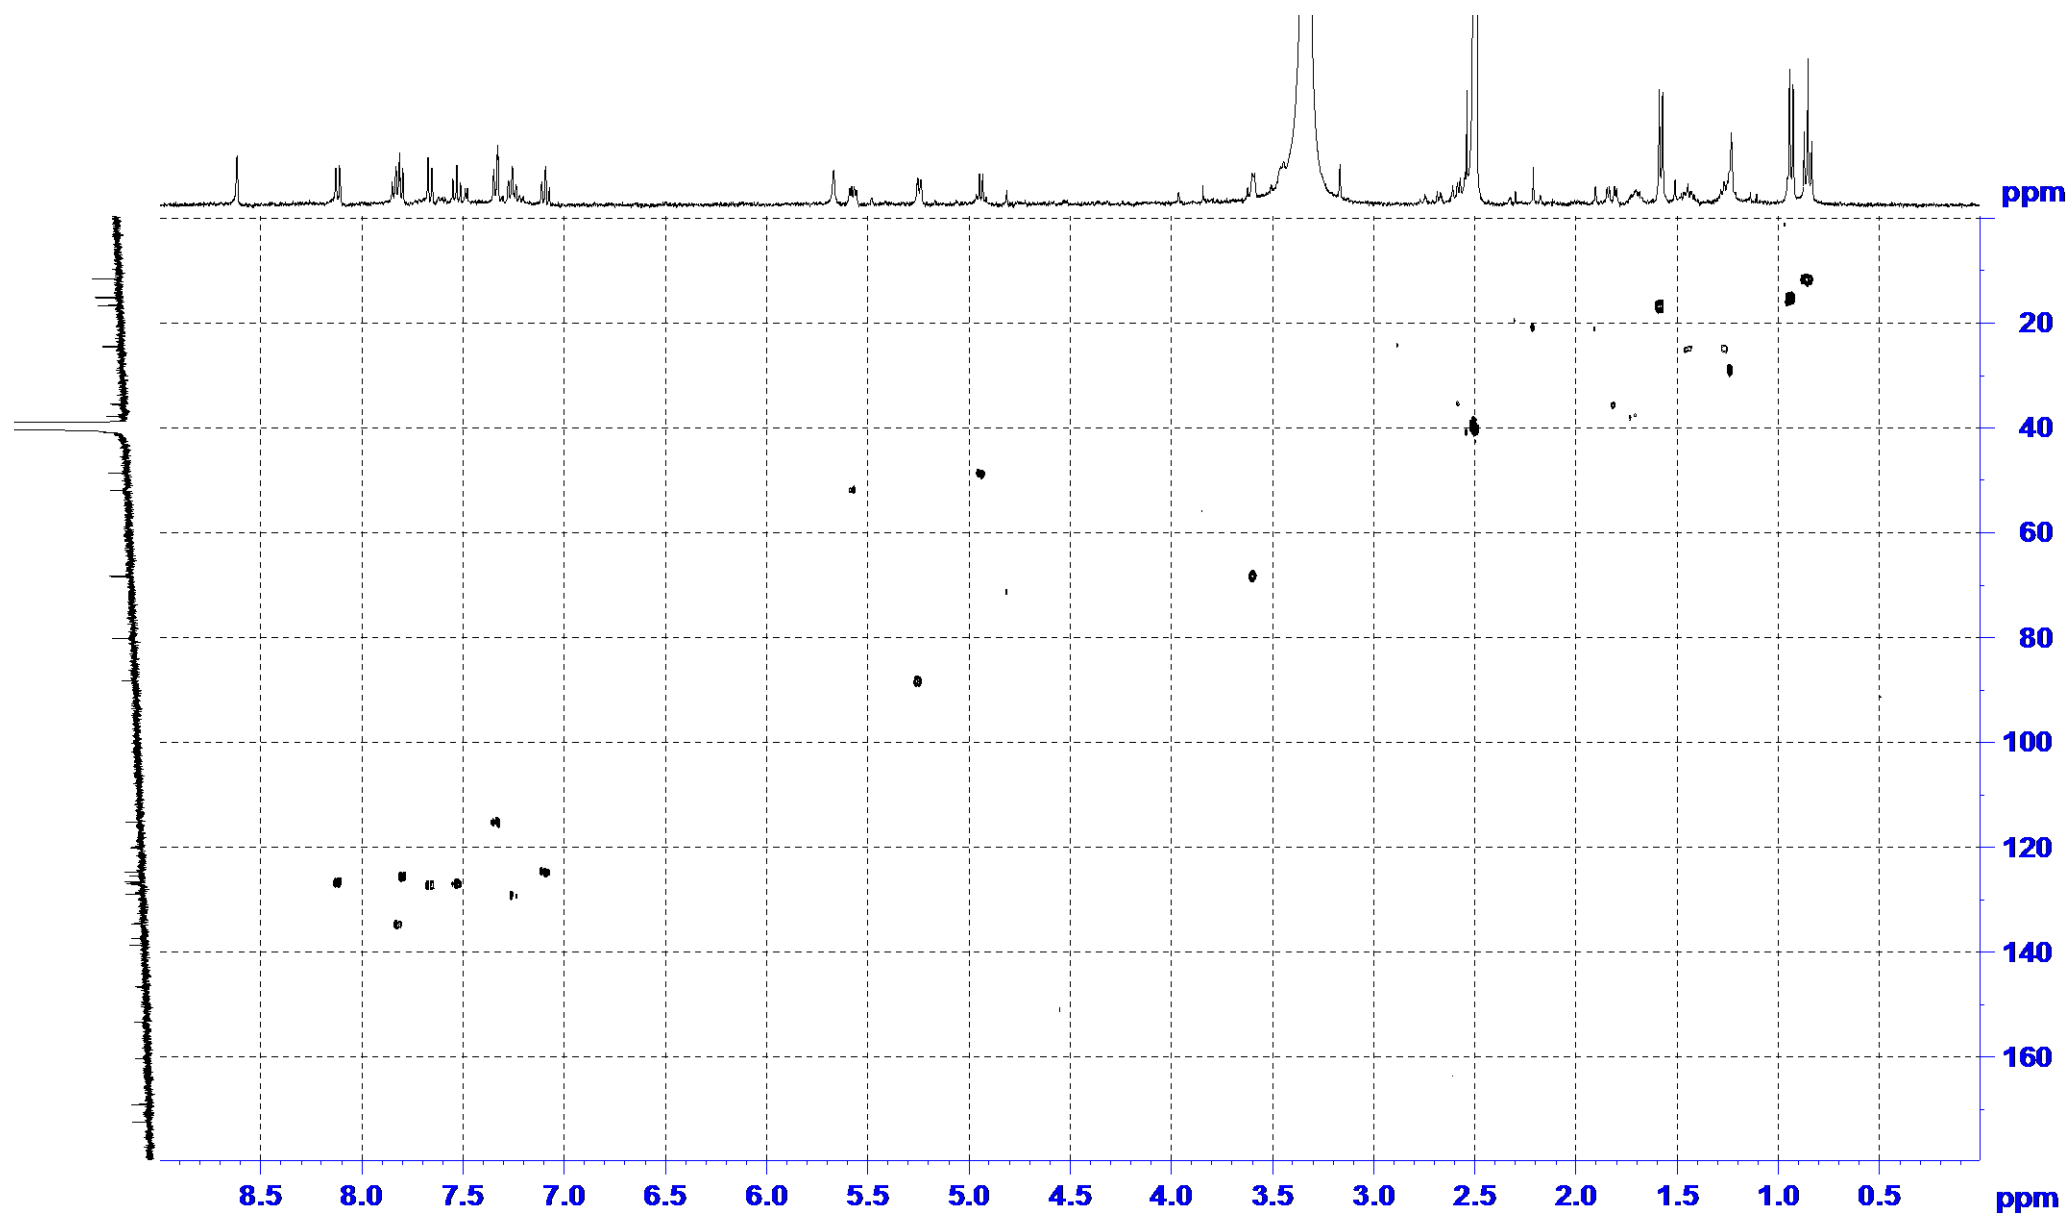

Figure S33  $^1\text{H}$ - $^1\text{H}$  COSY Spectrum of 4 in  $\text{DMSO-}d_6$

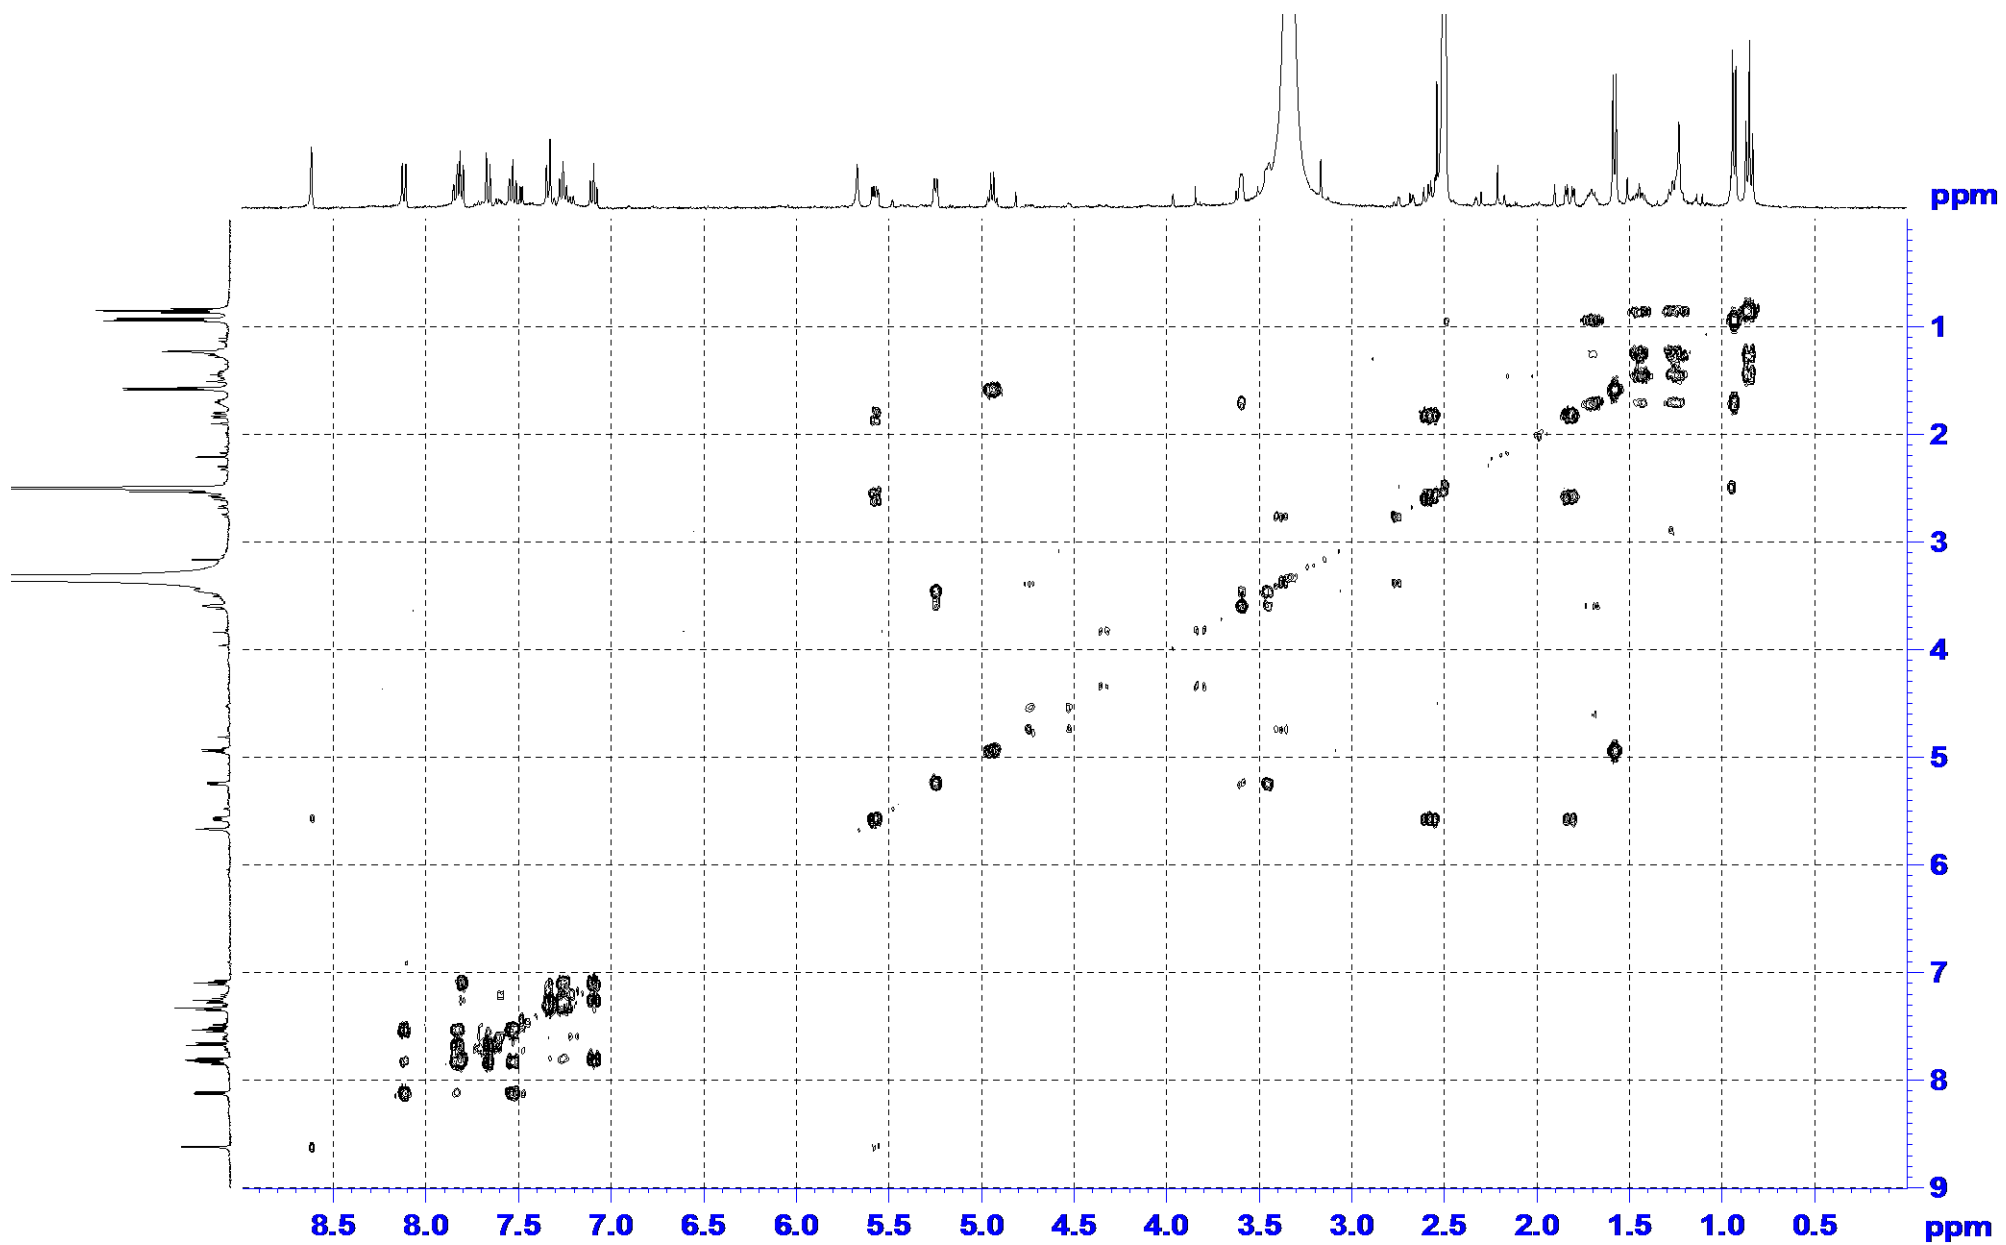

Figure S34 HMBC Spectrum of 4 in DMSO-*d*<sub>6</sub>

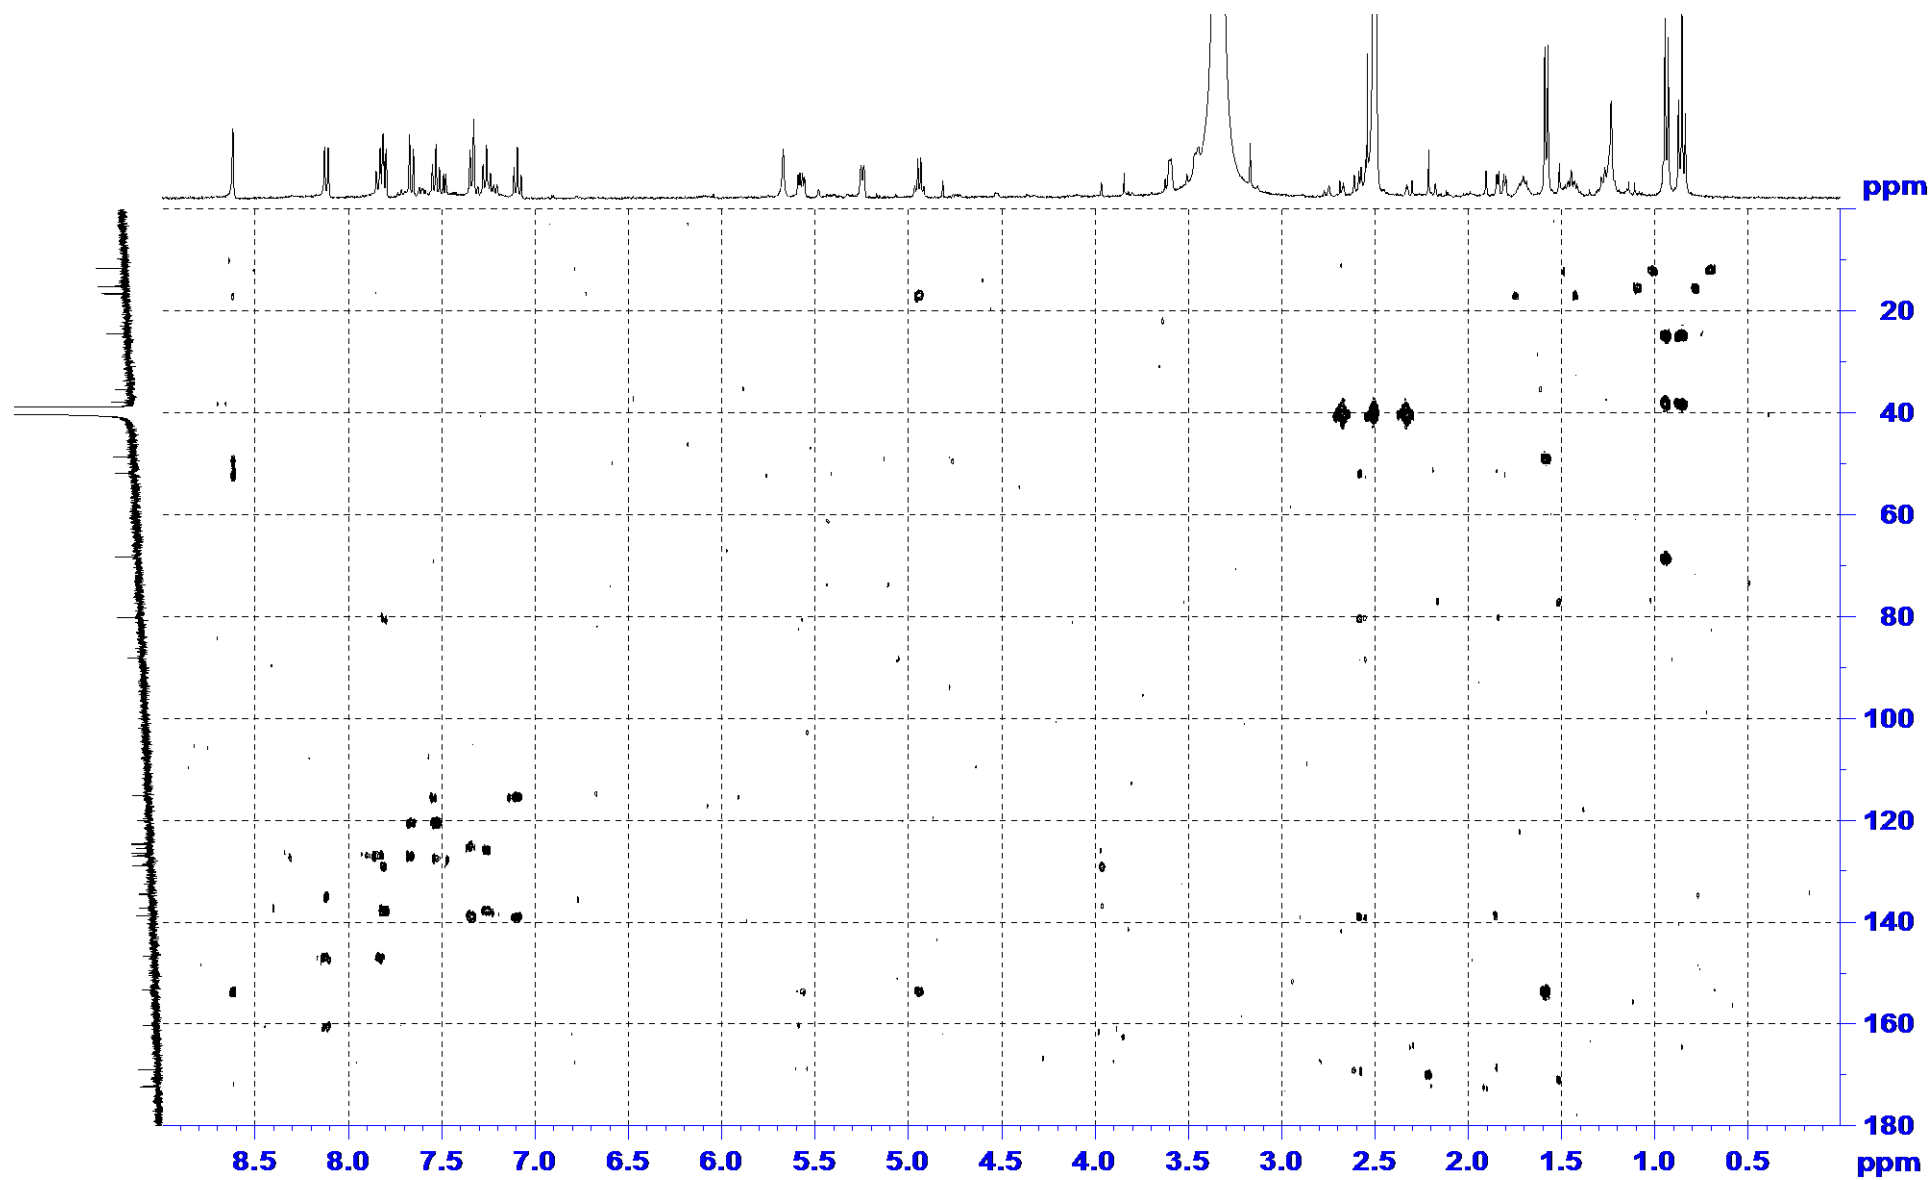

Figure S35 NOESY Spectrum of 4 in DMSO- $d_6$

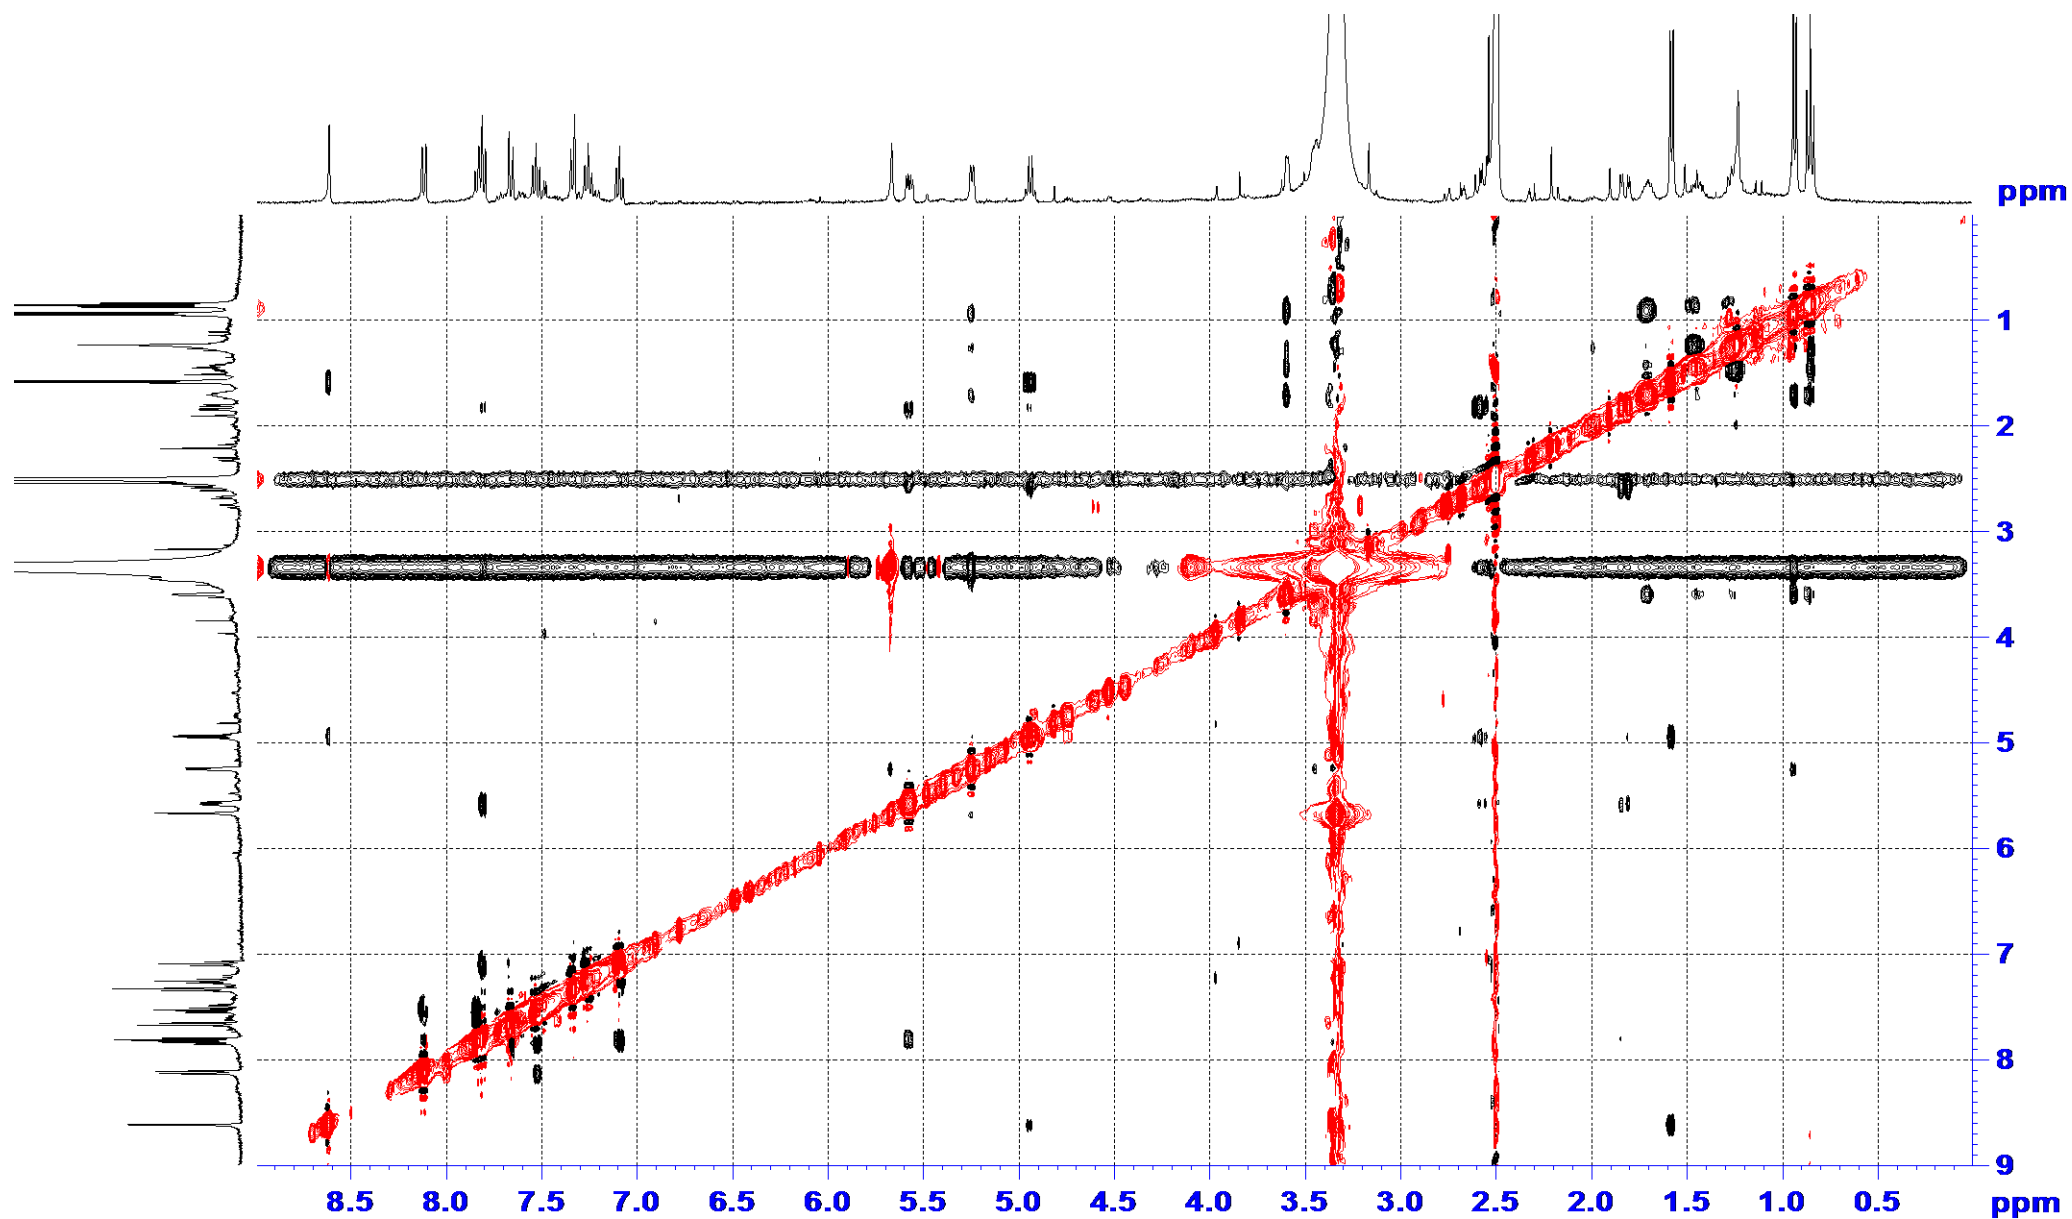

Figure S36

HRESIMS Data of 4

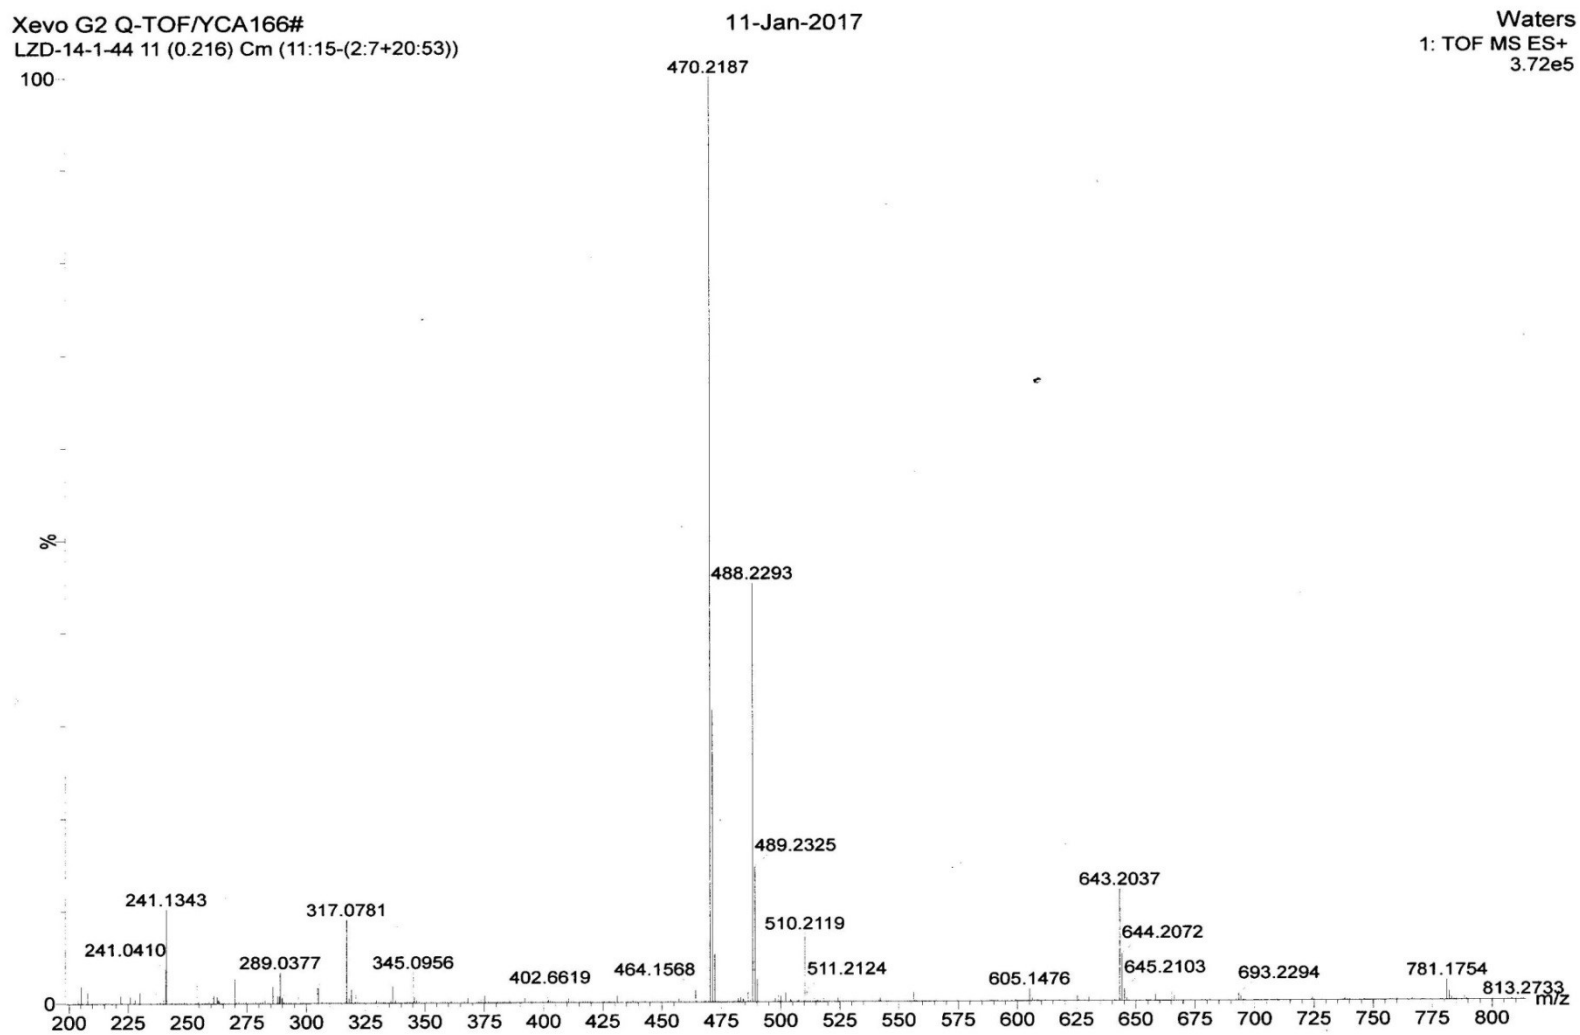

Figure S37 UV spectrum of 5

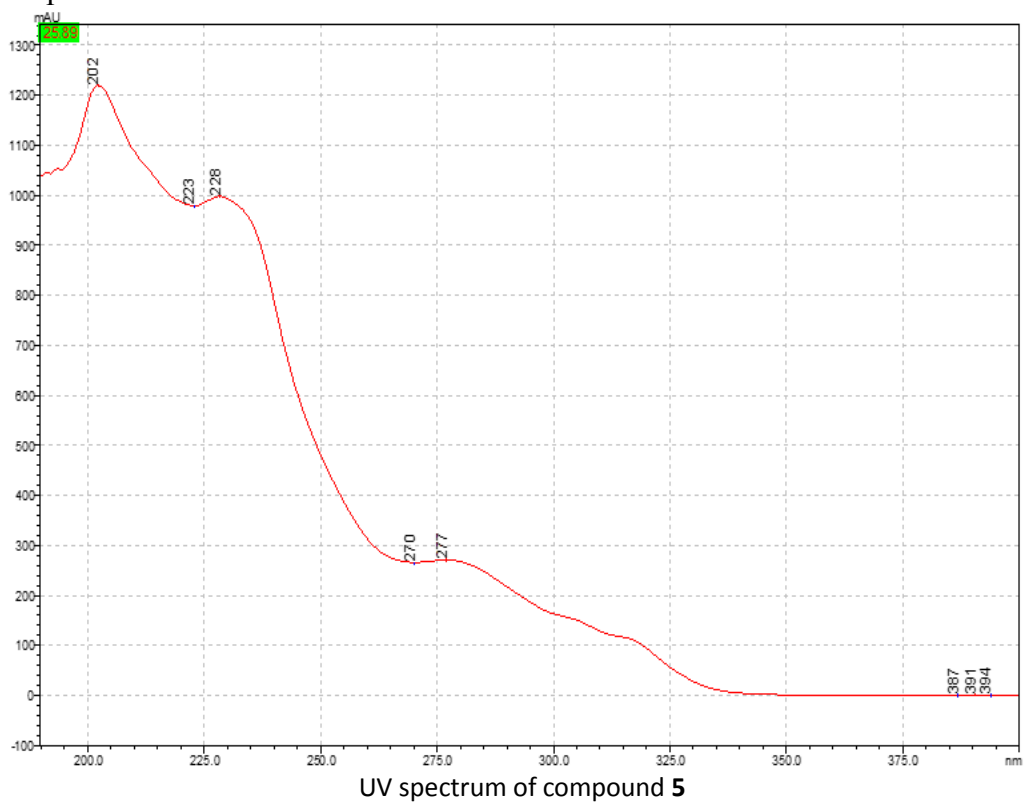

Figure S38 IR Spectrum of 5

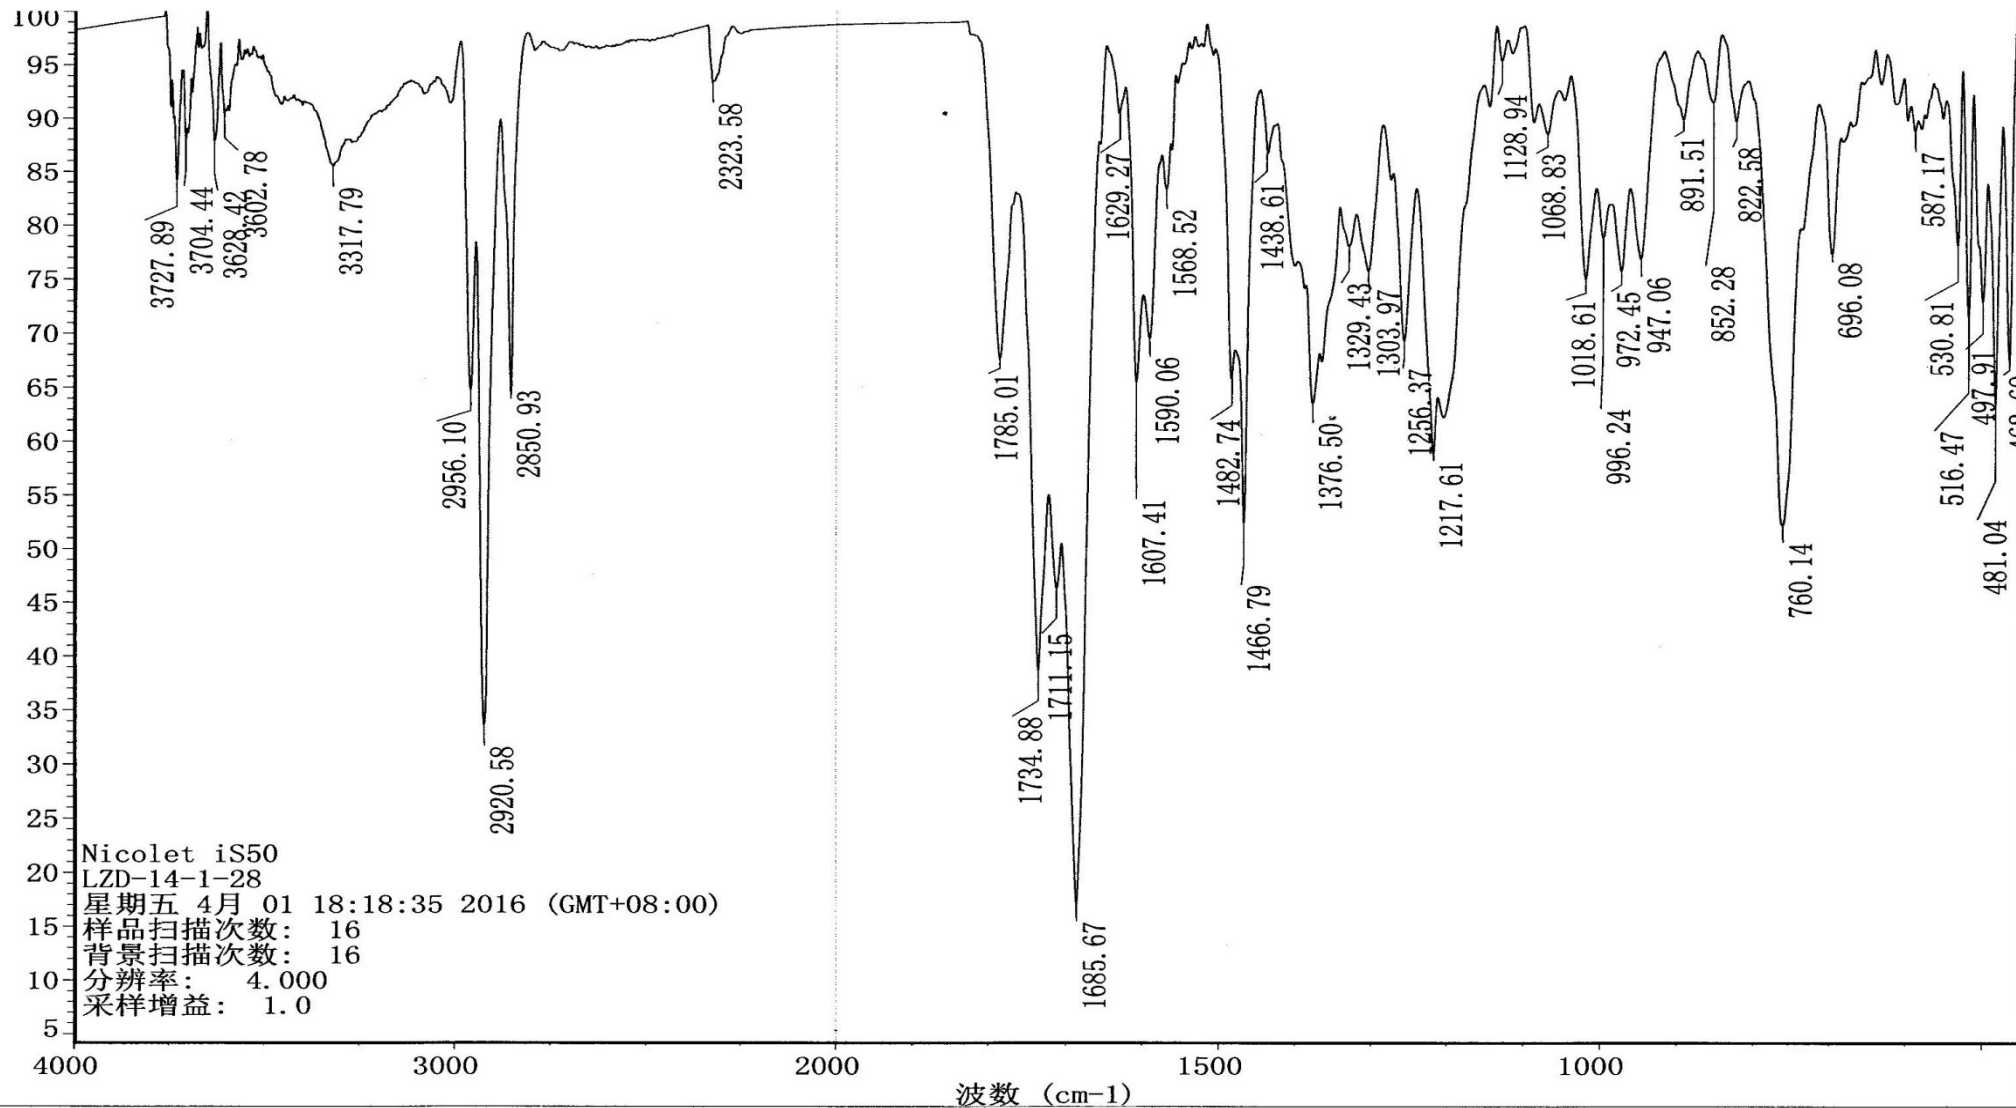



**Figure S39**  $^1\text{H}$  NMR Spectrum of **5** in  $\text{DMSO-}d_6$

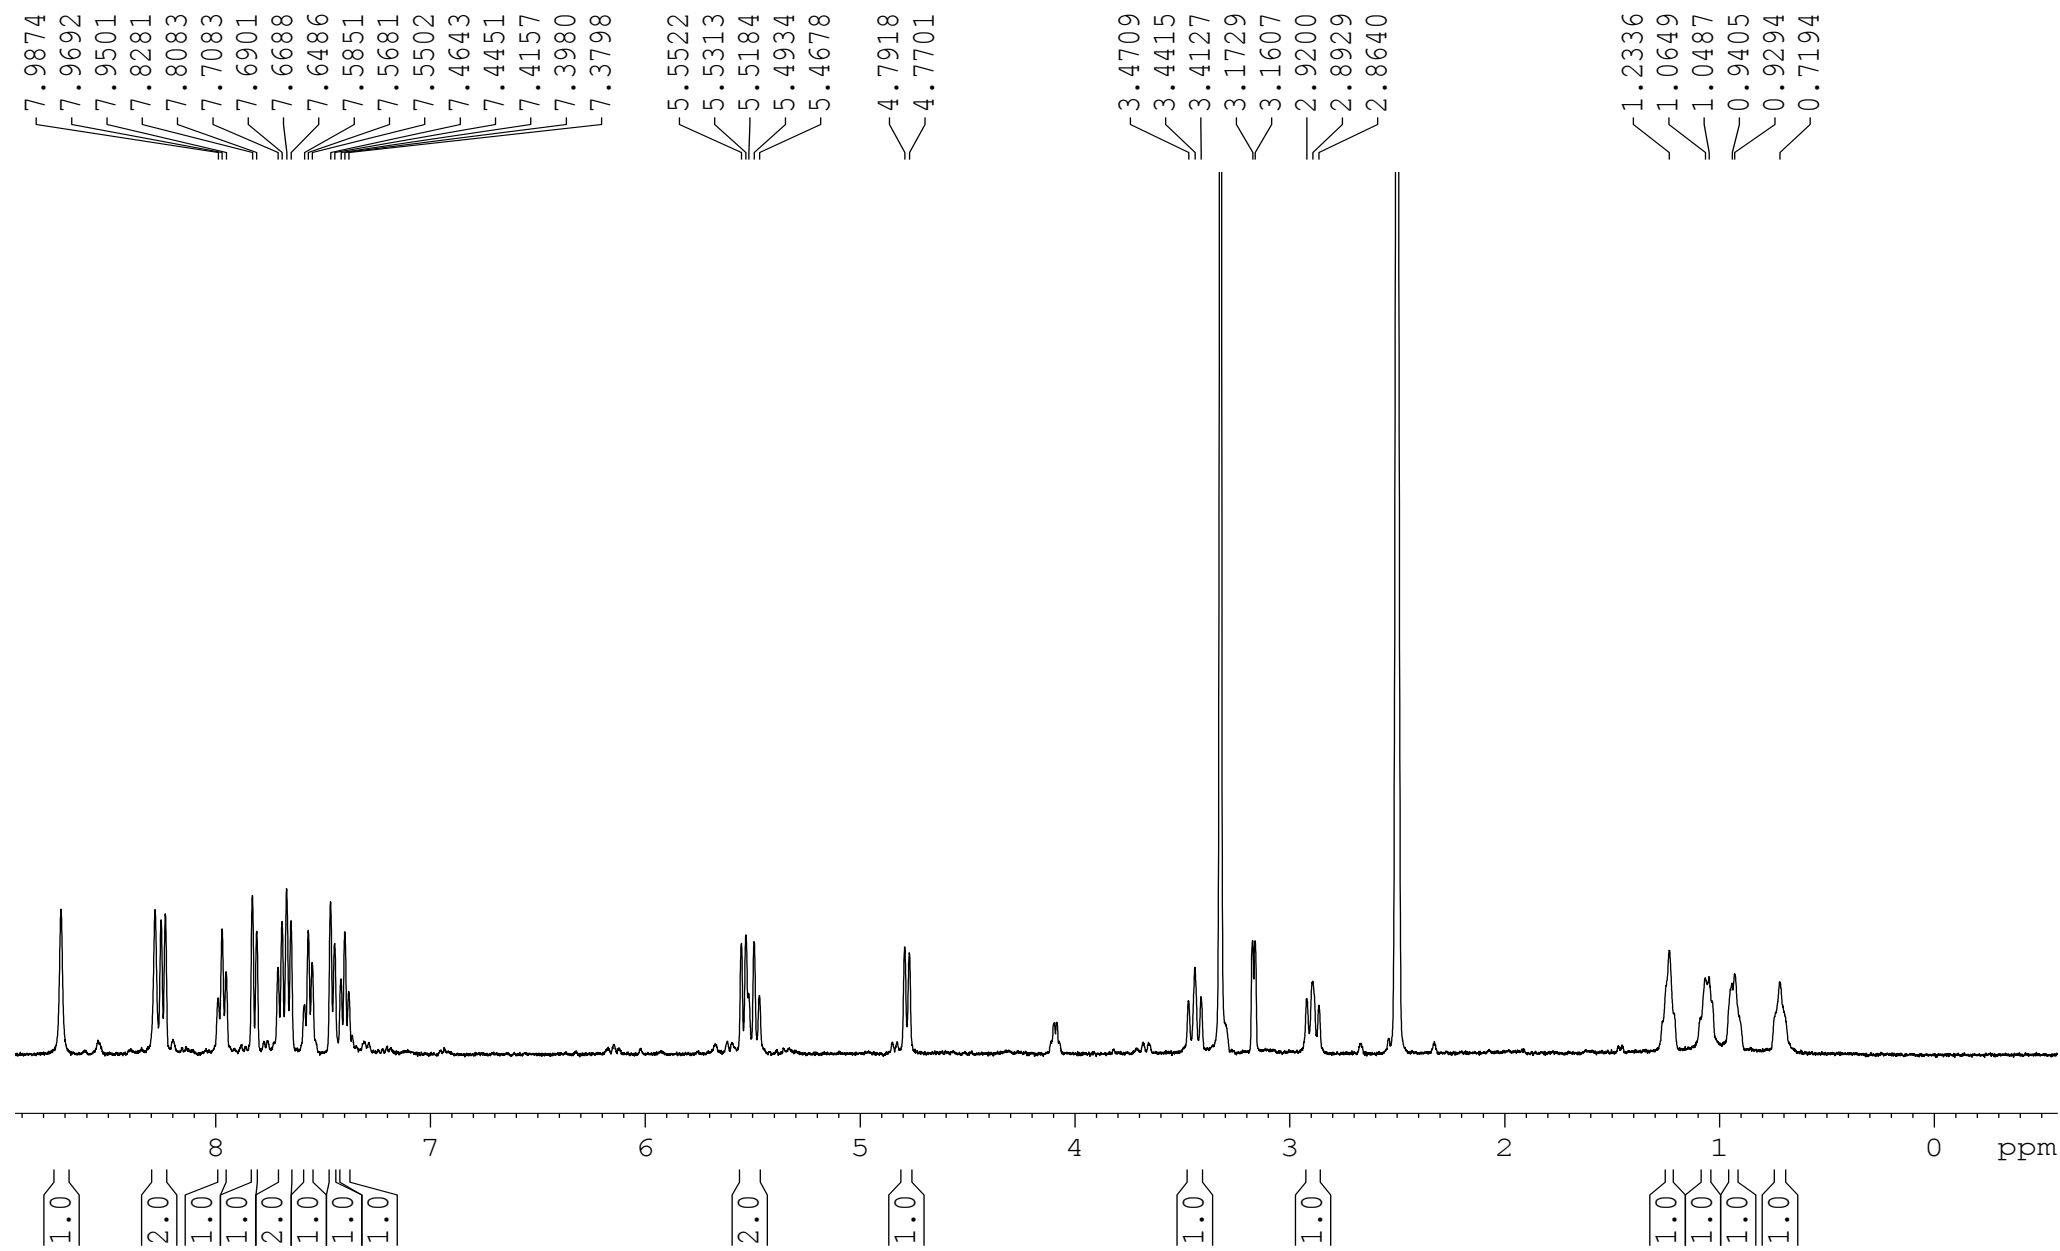

**Figure S40**  $^{13}\text{C}$  NMR Spectrum of **5** in  $\text{DMSO-}d_6$

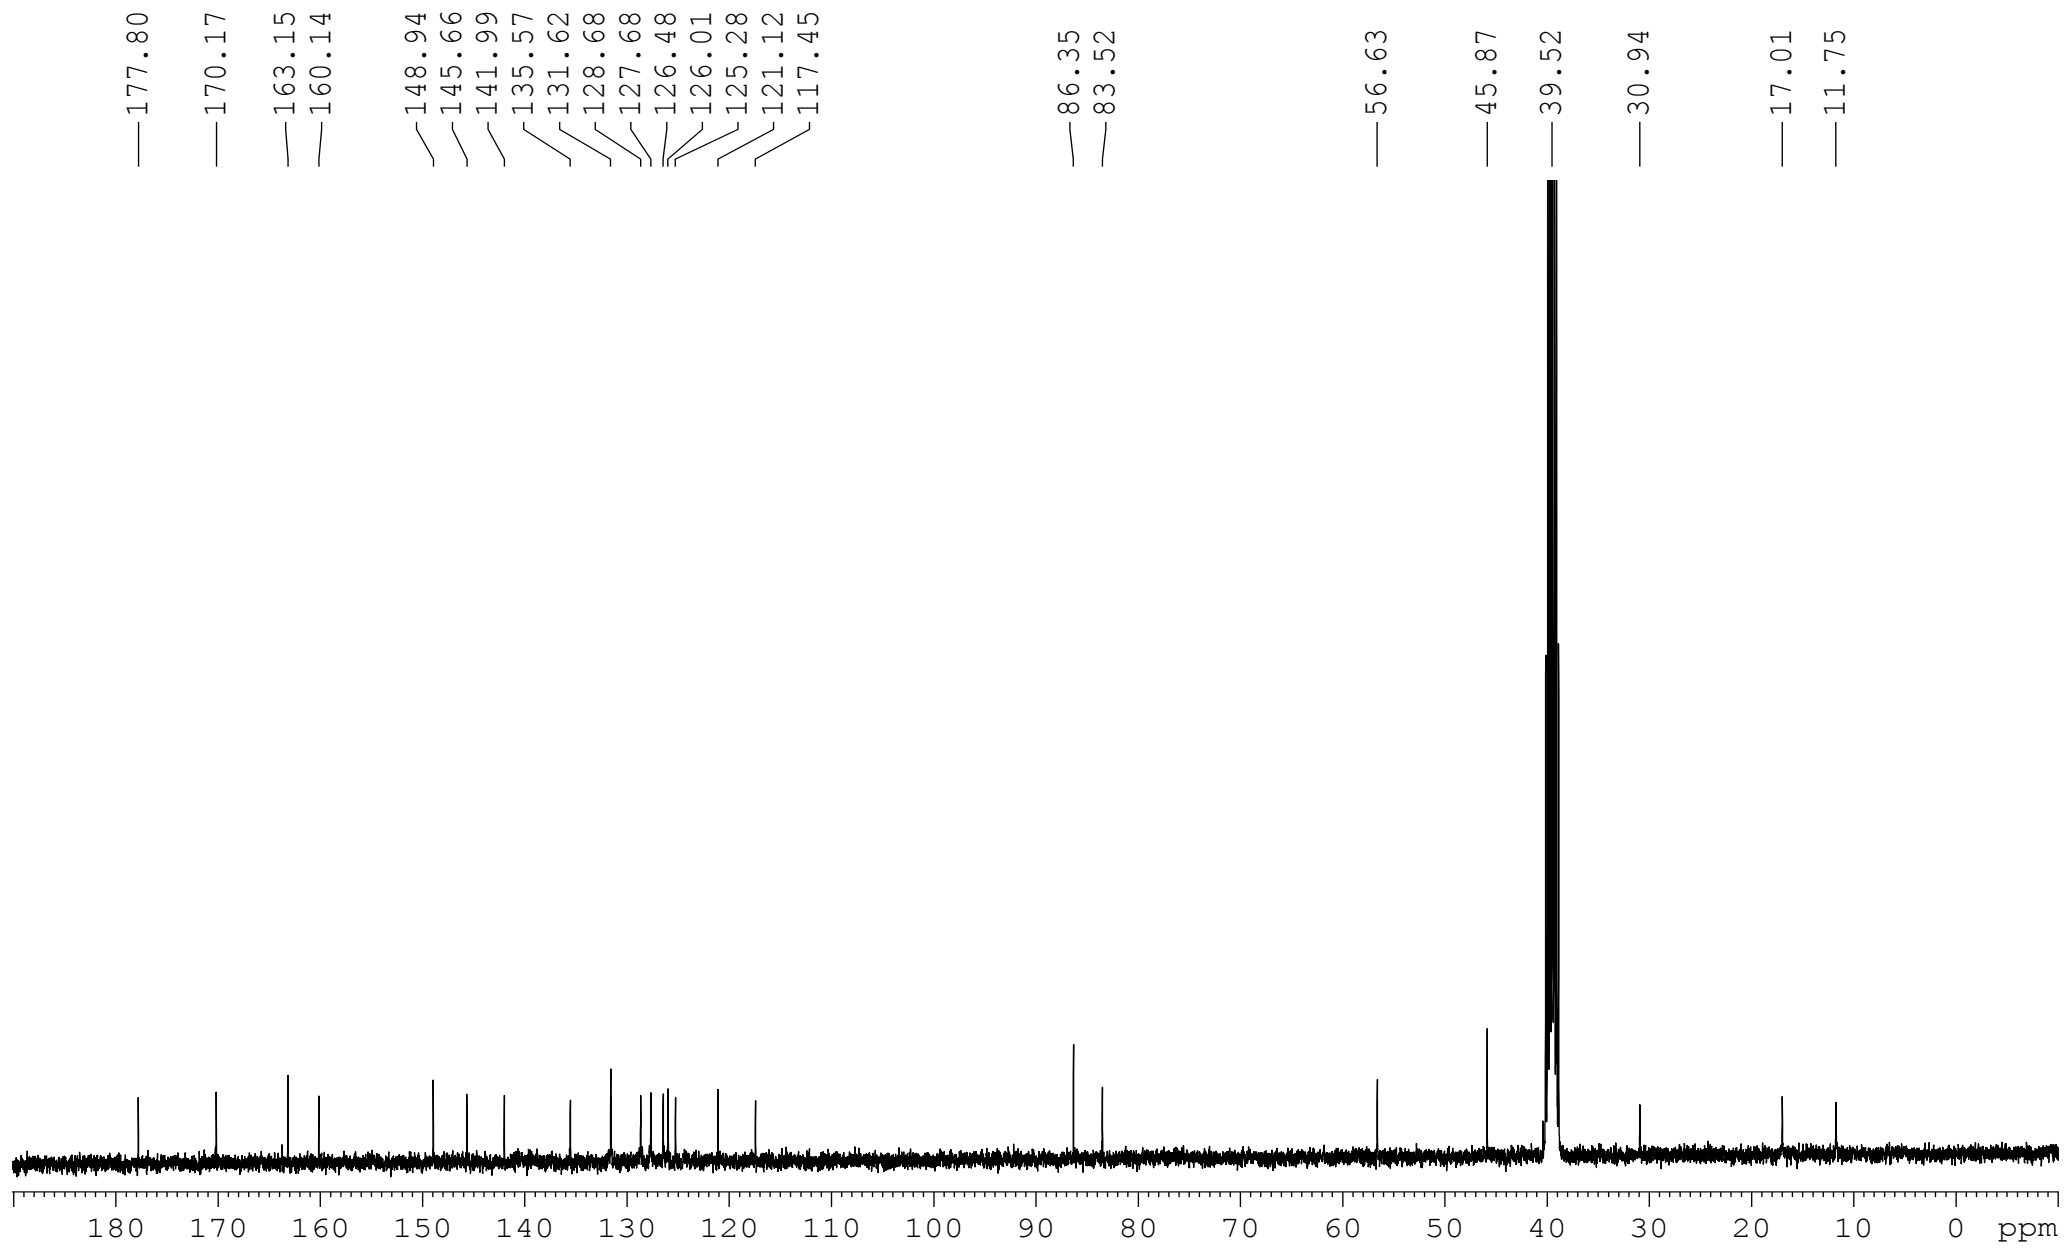

Figure S41 HSQC Spectrum of **5** in DMSO-*d*<sub>6</sub>

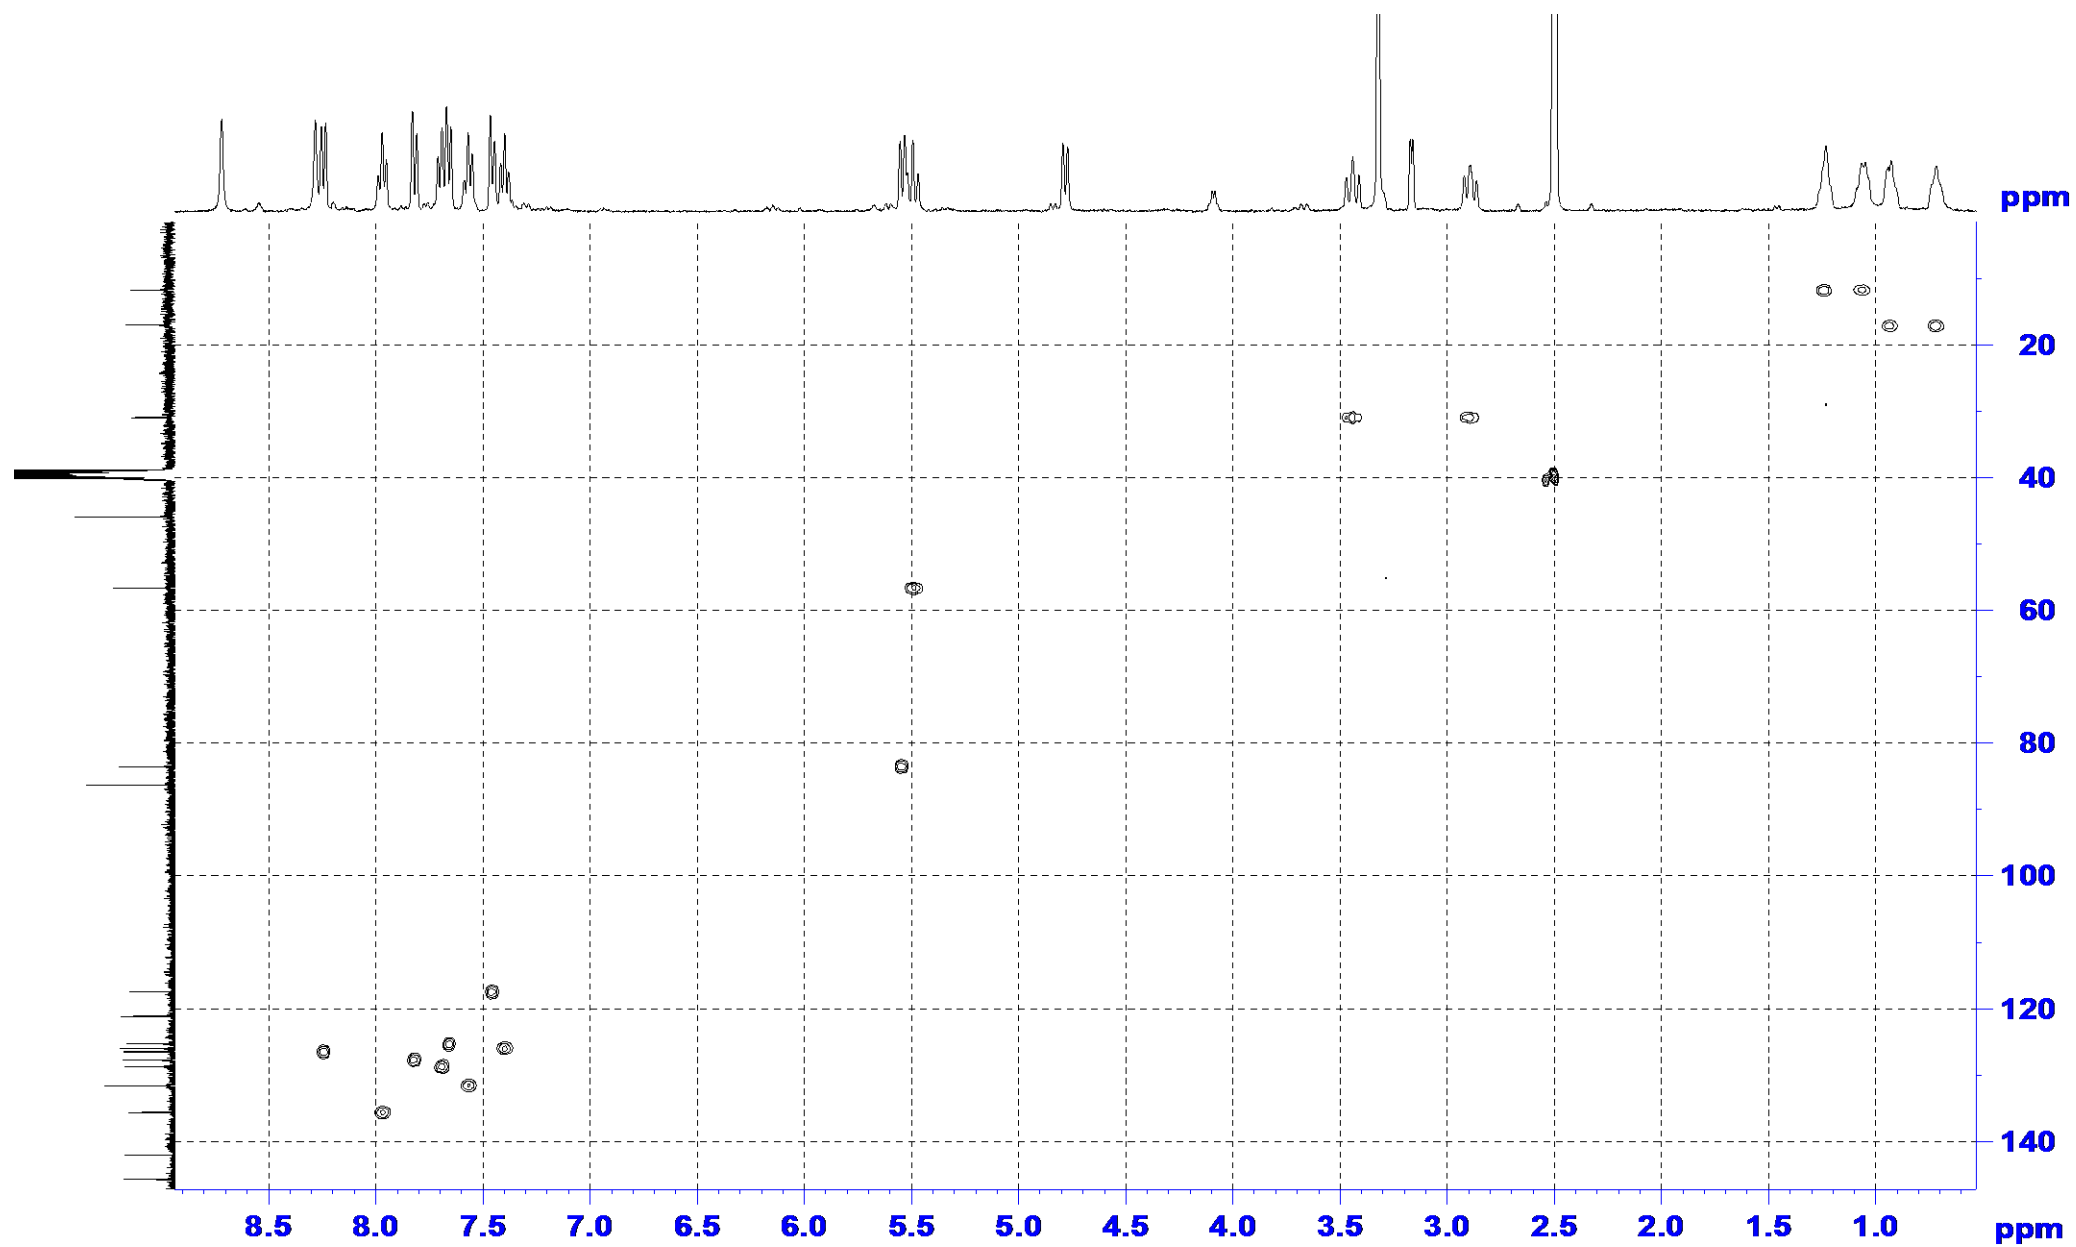

Figure S42  $^1\text{H}$ - $^1\text{H}$  COSY Spectrum of **5** in  $\text{DMSO-}d_6$

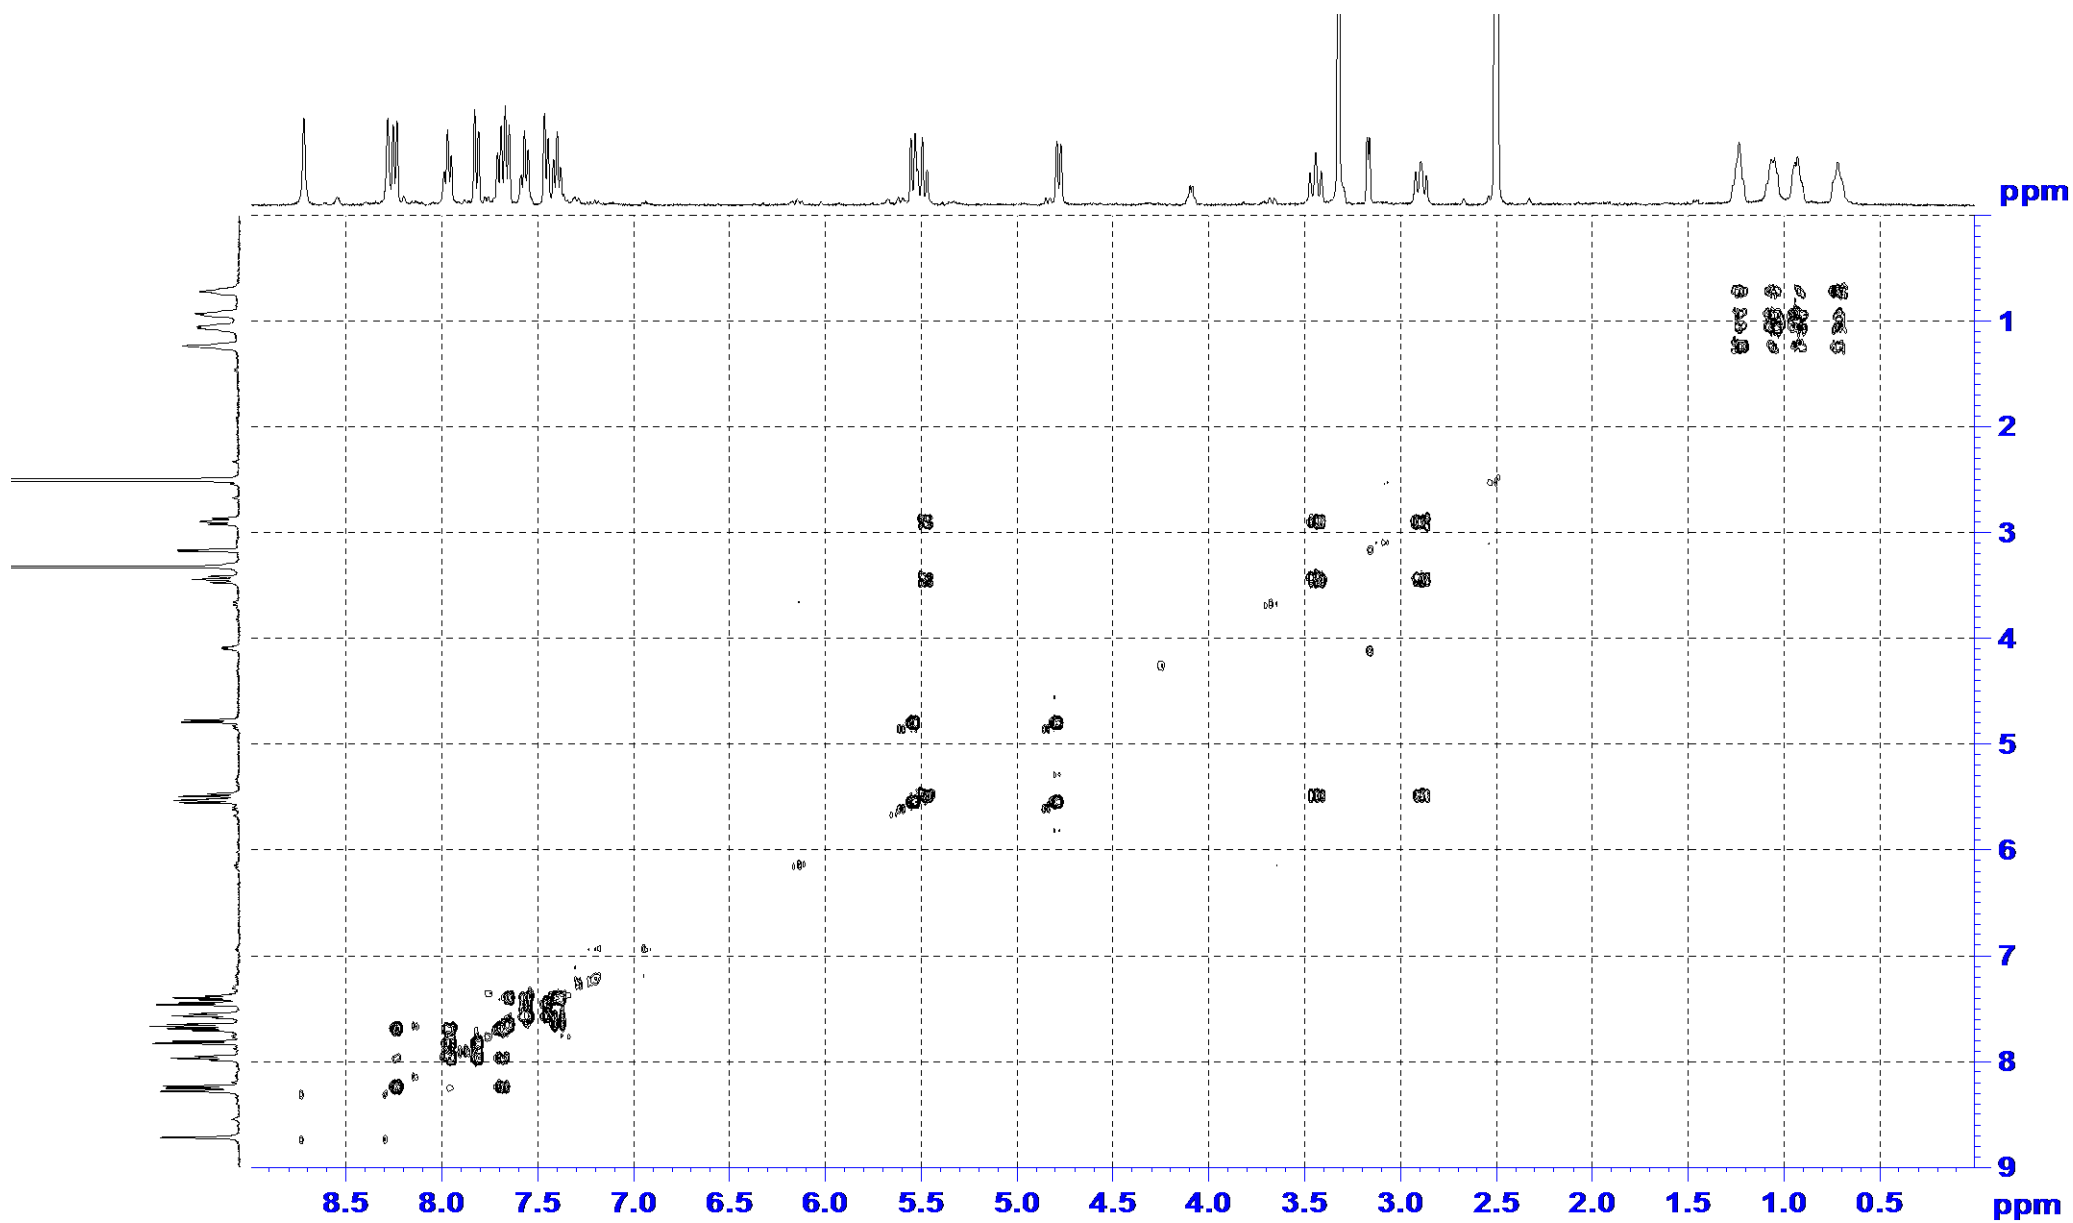

Figure S43 HMBC Spectrum of 5 in DMSO-*d*<sub>6</sub>

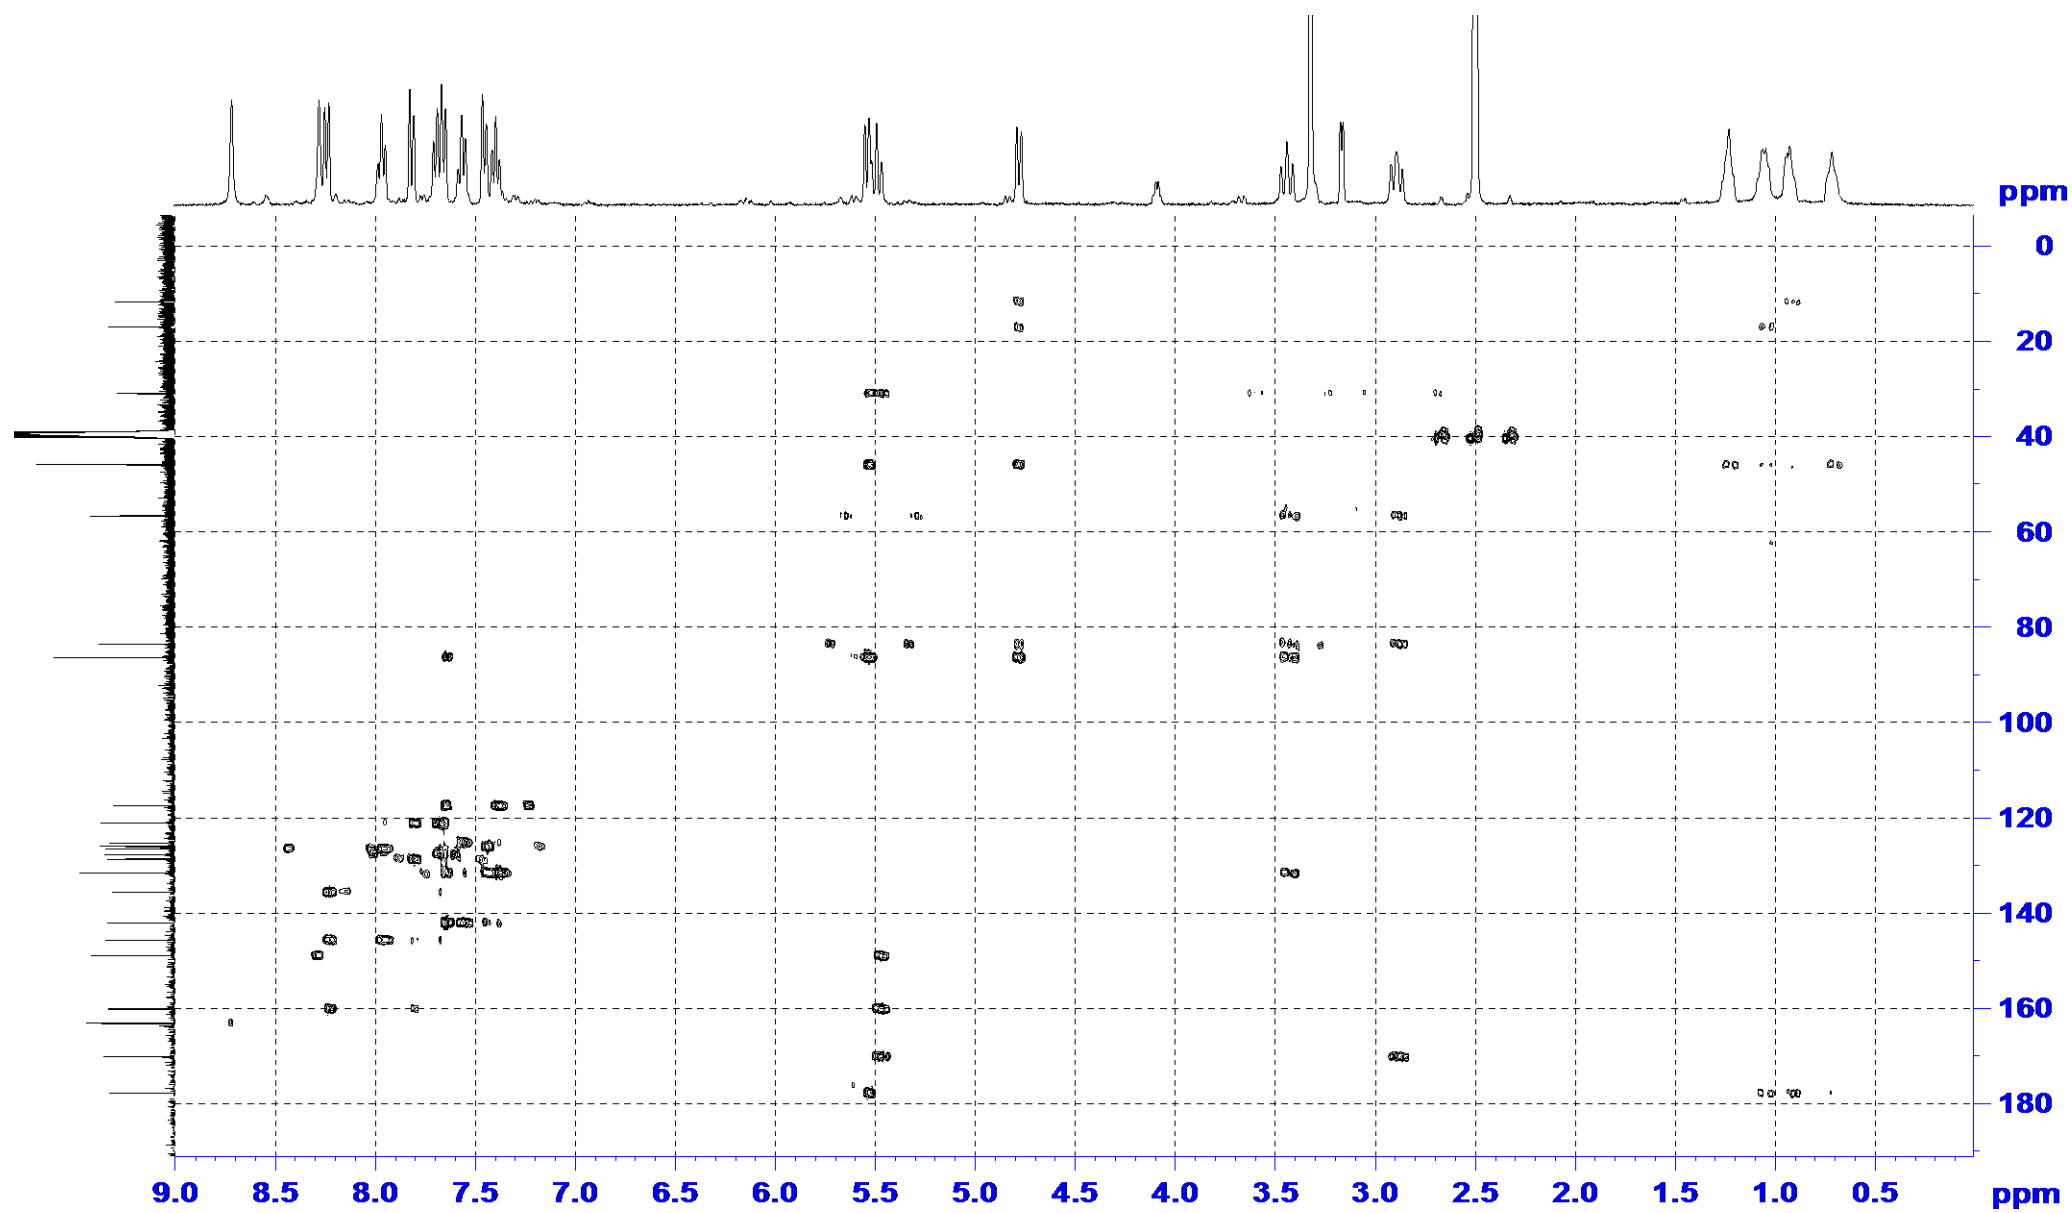

Figure S44 NOESY Spectrum of **5** in DMSO- $d_6$

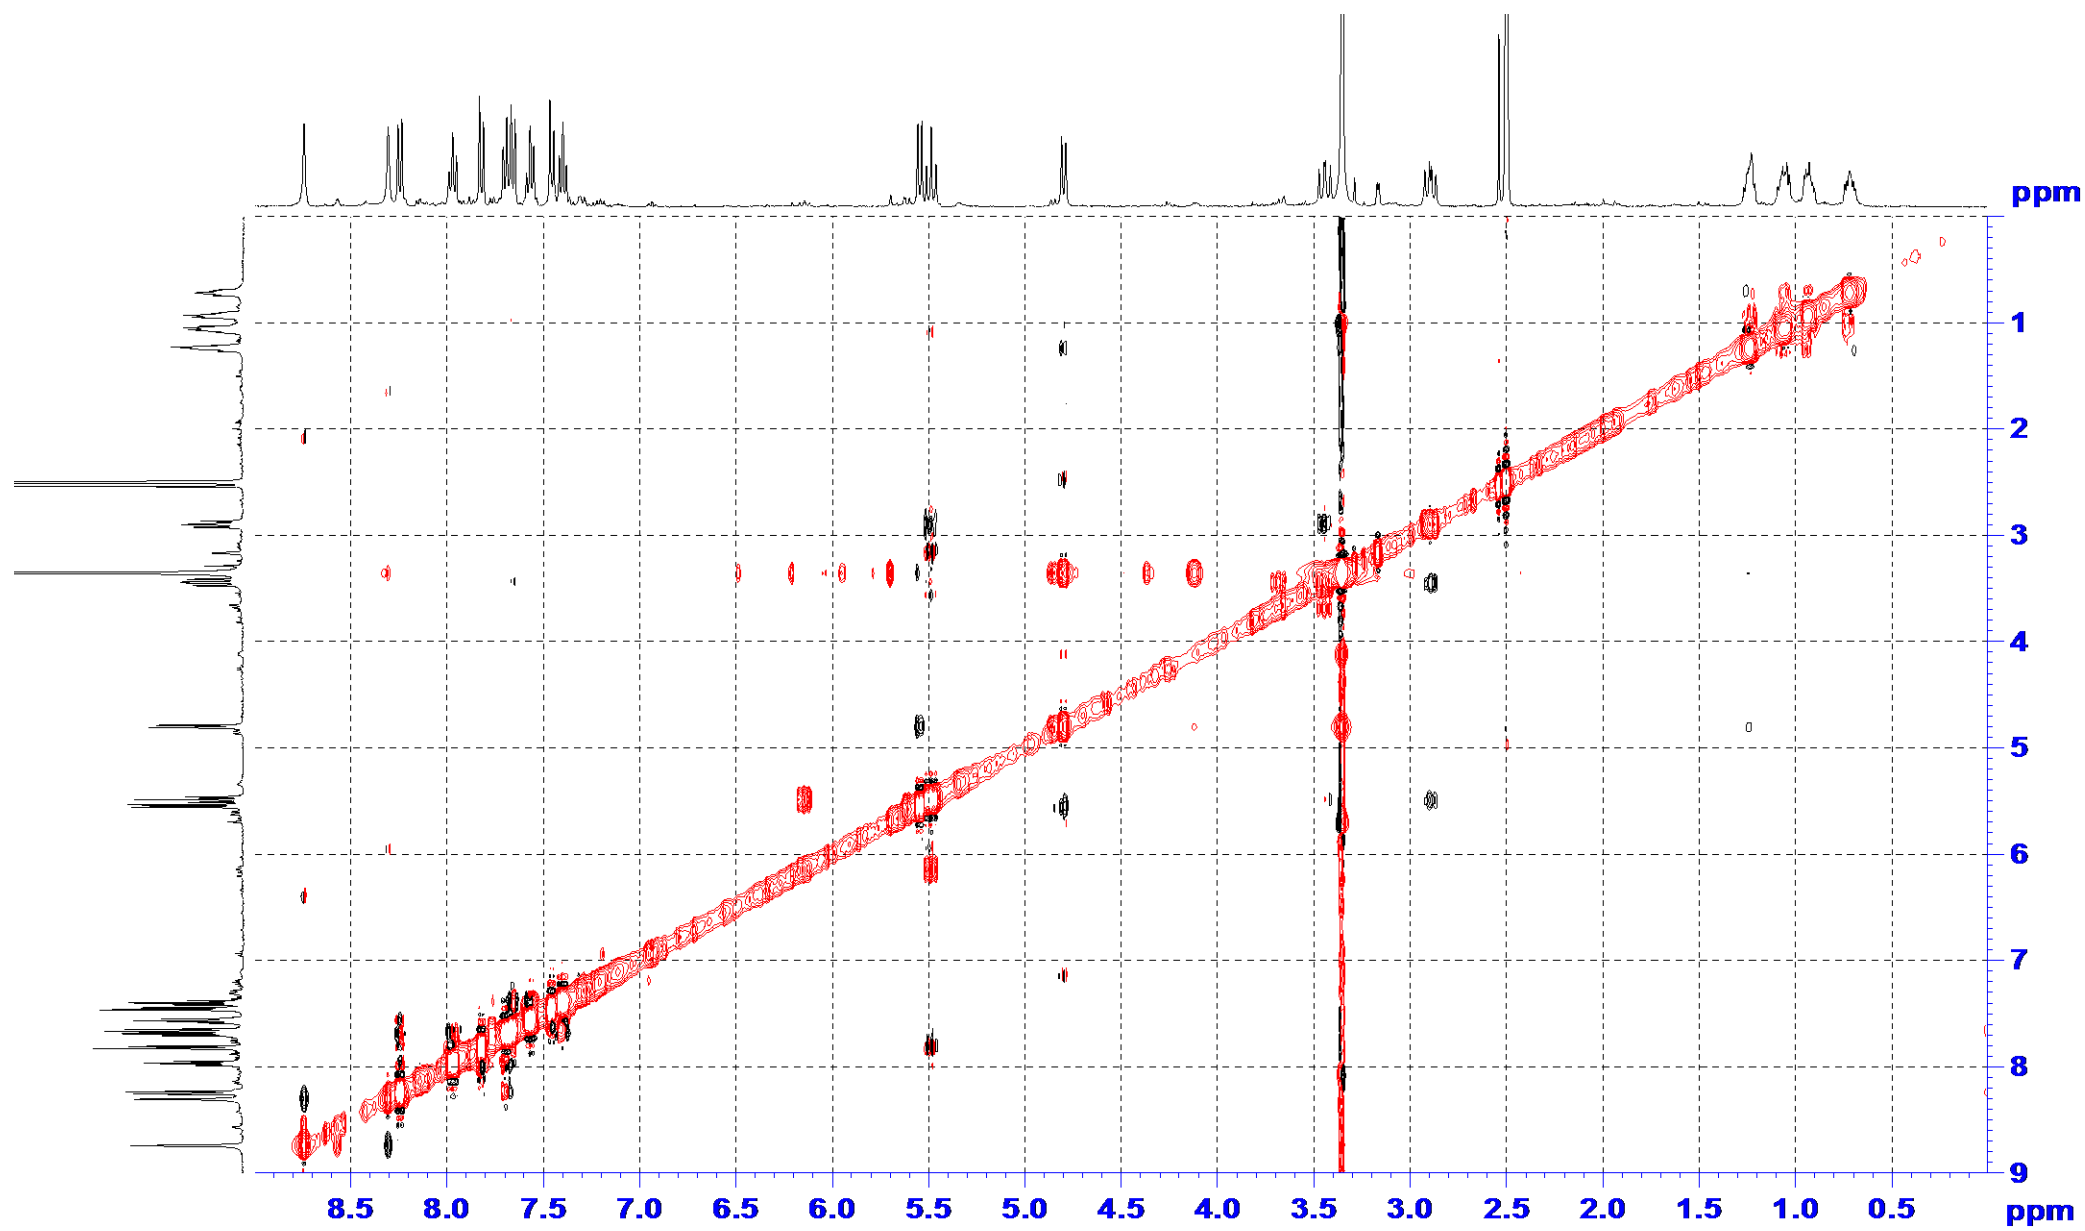

Figure S45 HRESIMS Data of 5

Xevo G2 Q-TOF/YCA166#

01-Mar-2016

Waters

LZD-14-1-28 11 (0.216) Cm (10:15-(2:6+20:54))

1: TOF MS ES+  
2.65e5

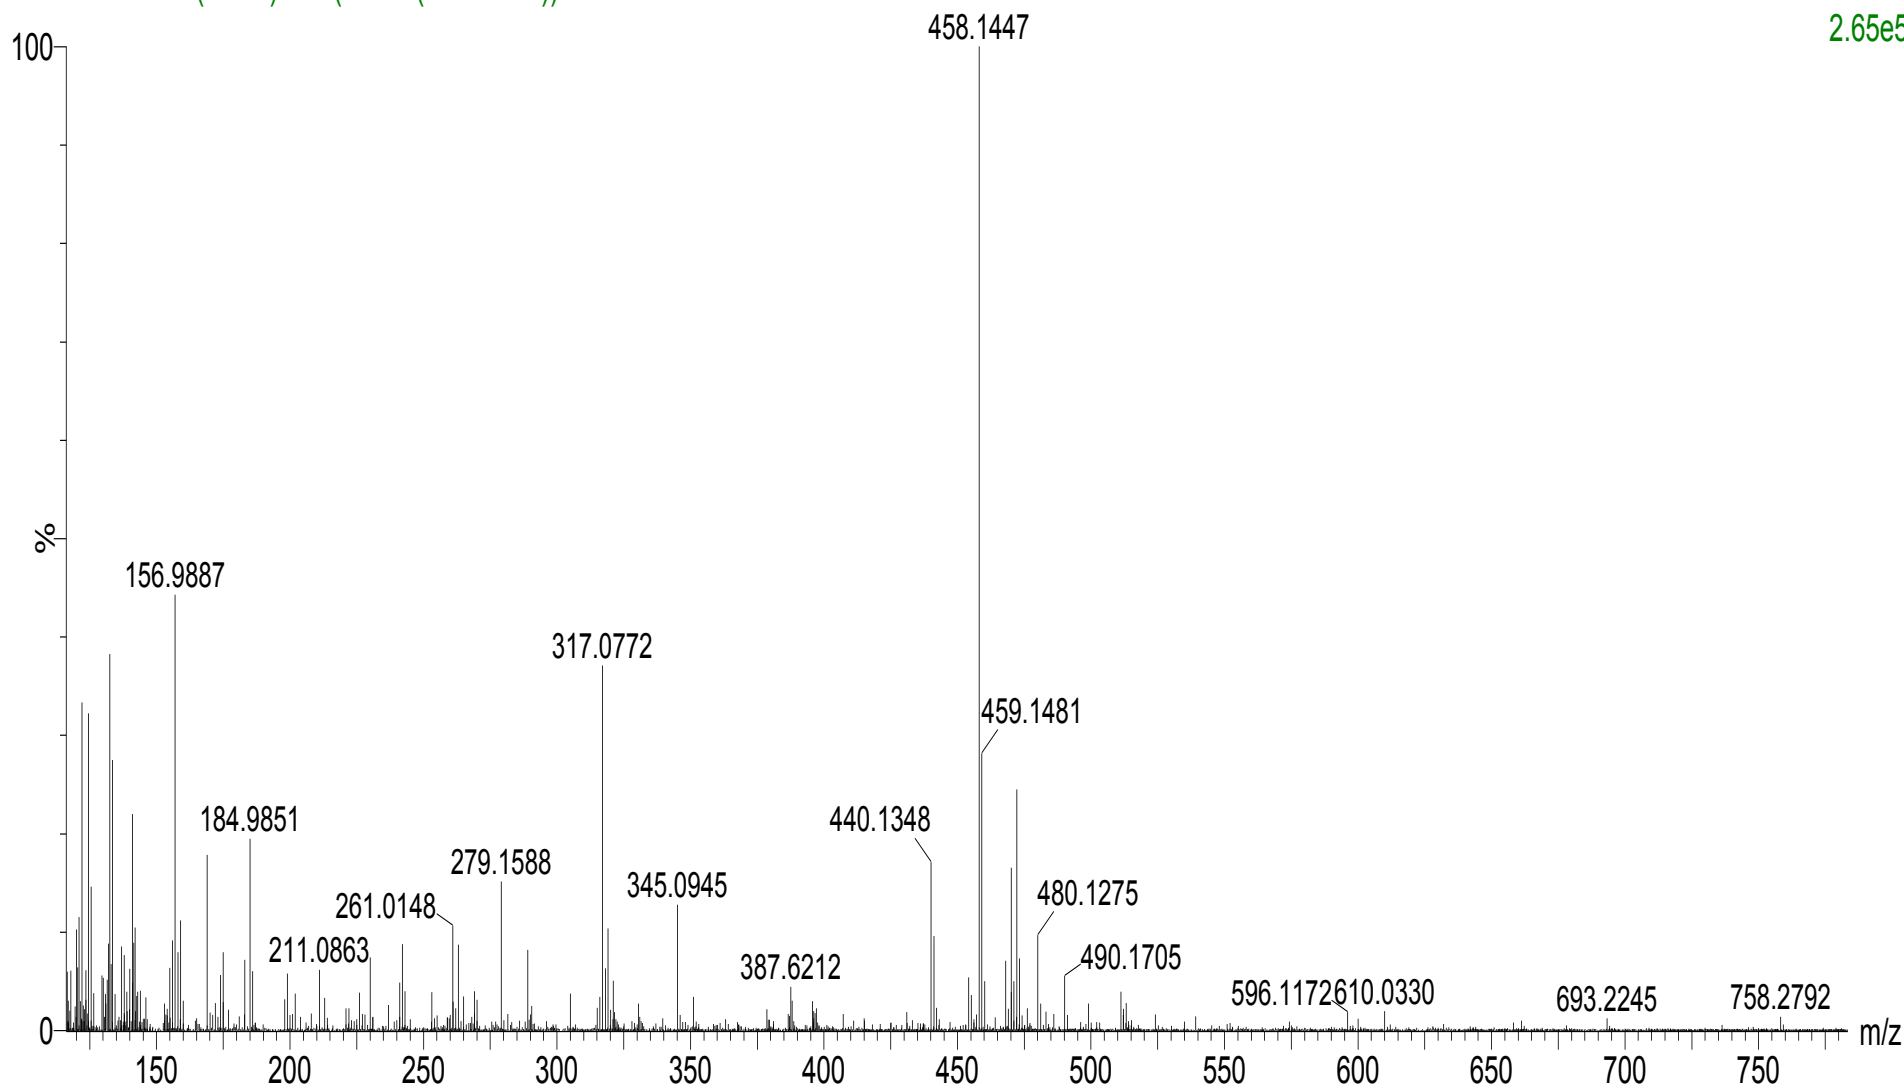

**Figure S46** UV spectrum of **6**

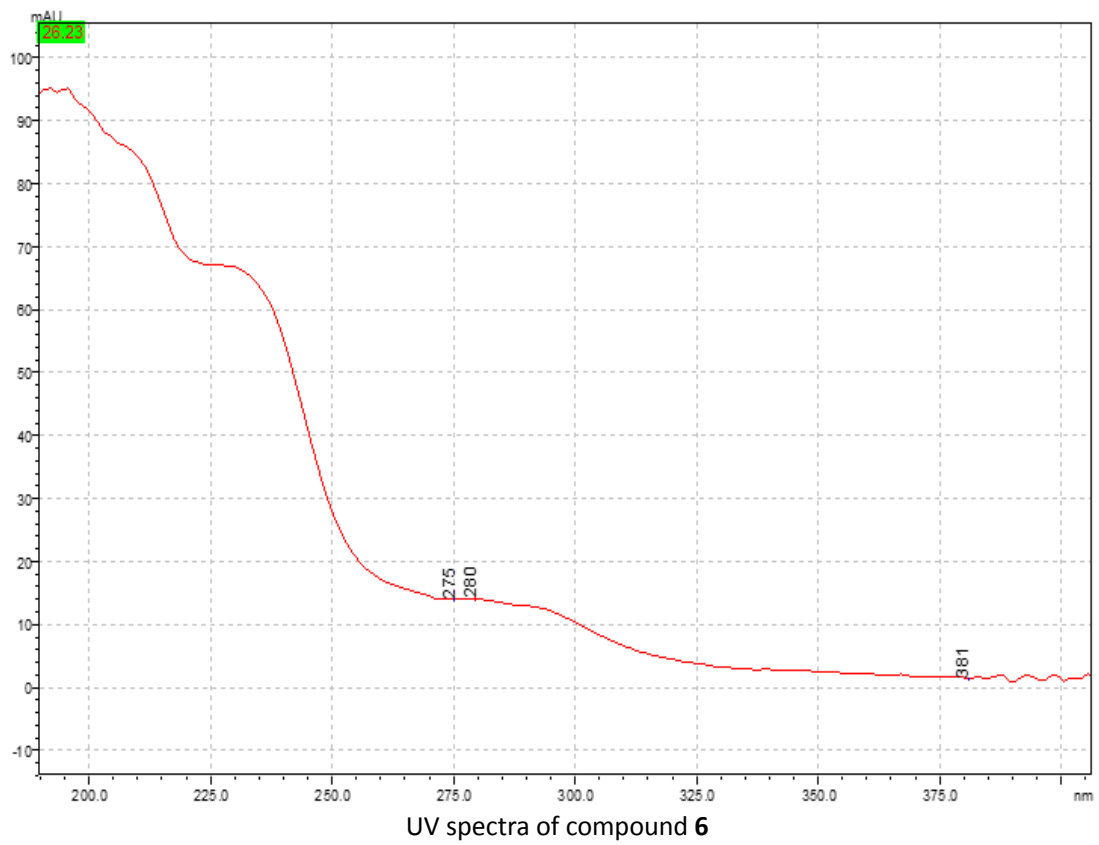



Figure S47 IR Spectrum of 6

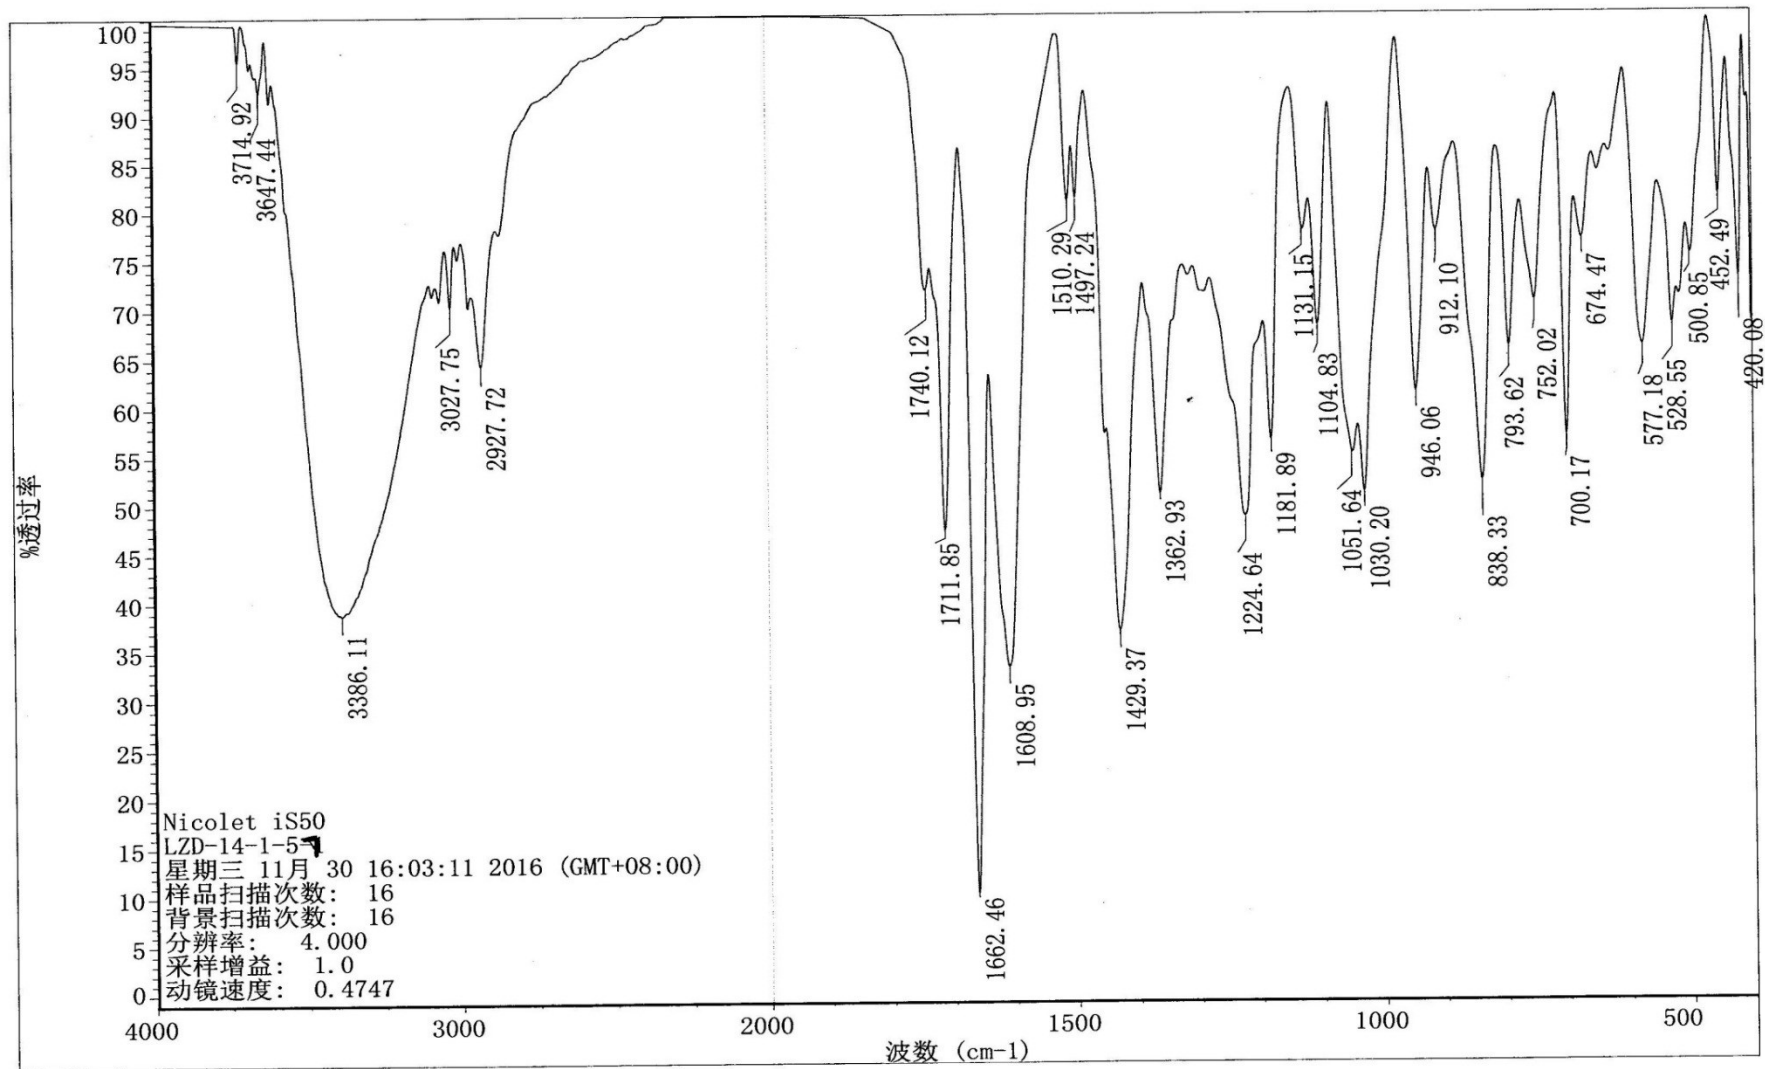

**Figure S48**  $^1\text{H}$  NMR Spectrum of **6** in  $\text{DMSO-}d_6$

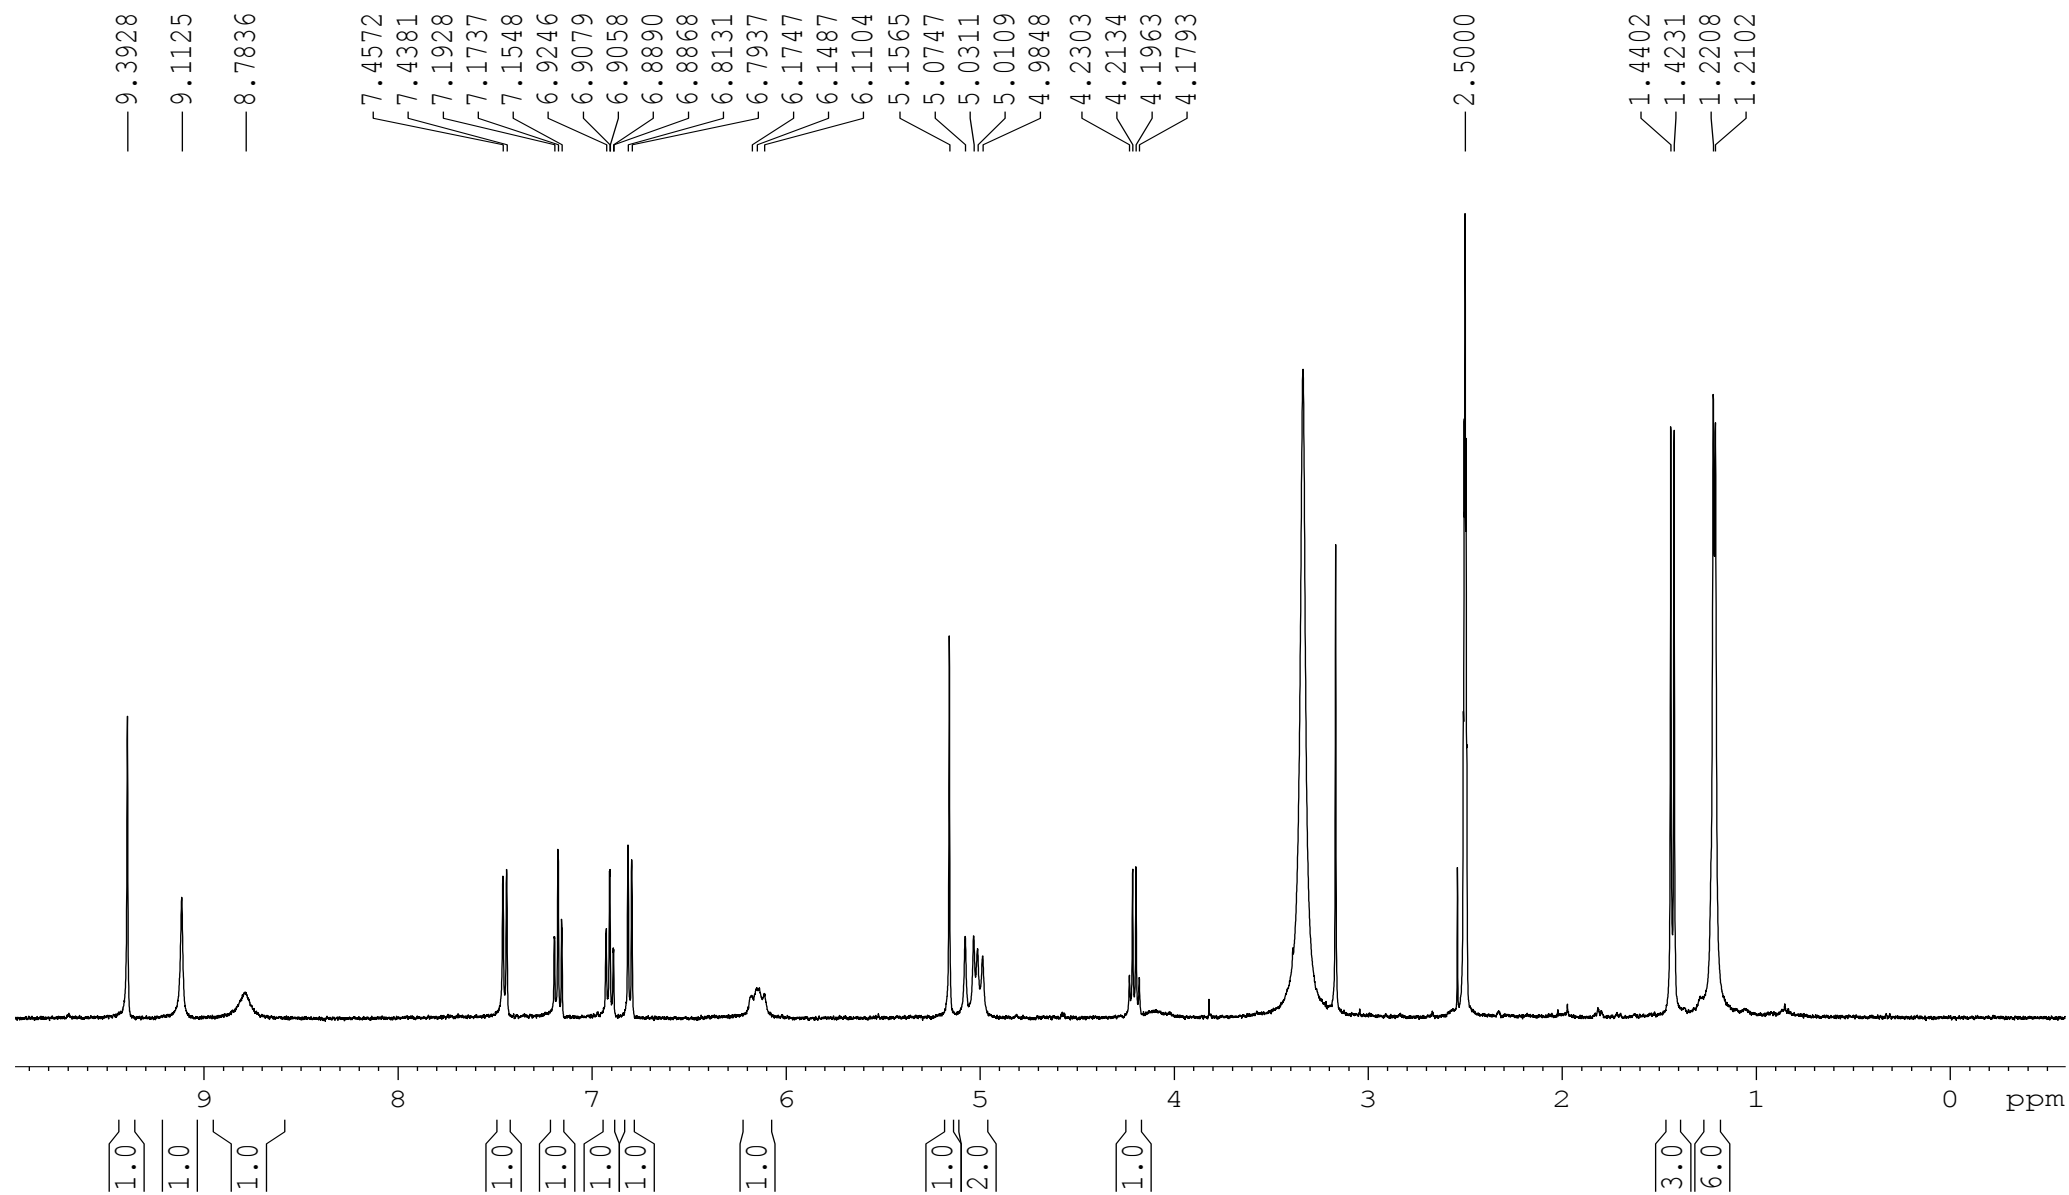

**Figure S49**

DEPTQ Spectrum of **6** in DMSO-*d*<sub>6</sub>

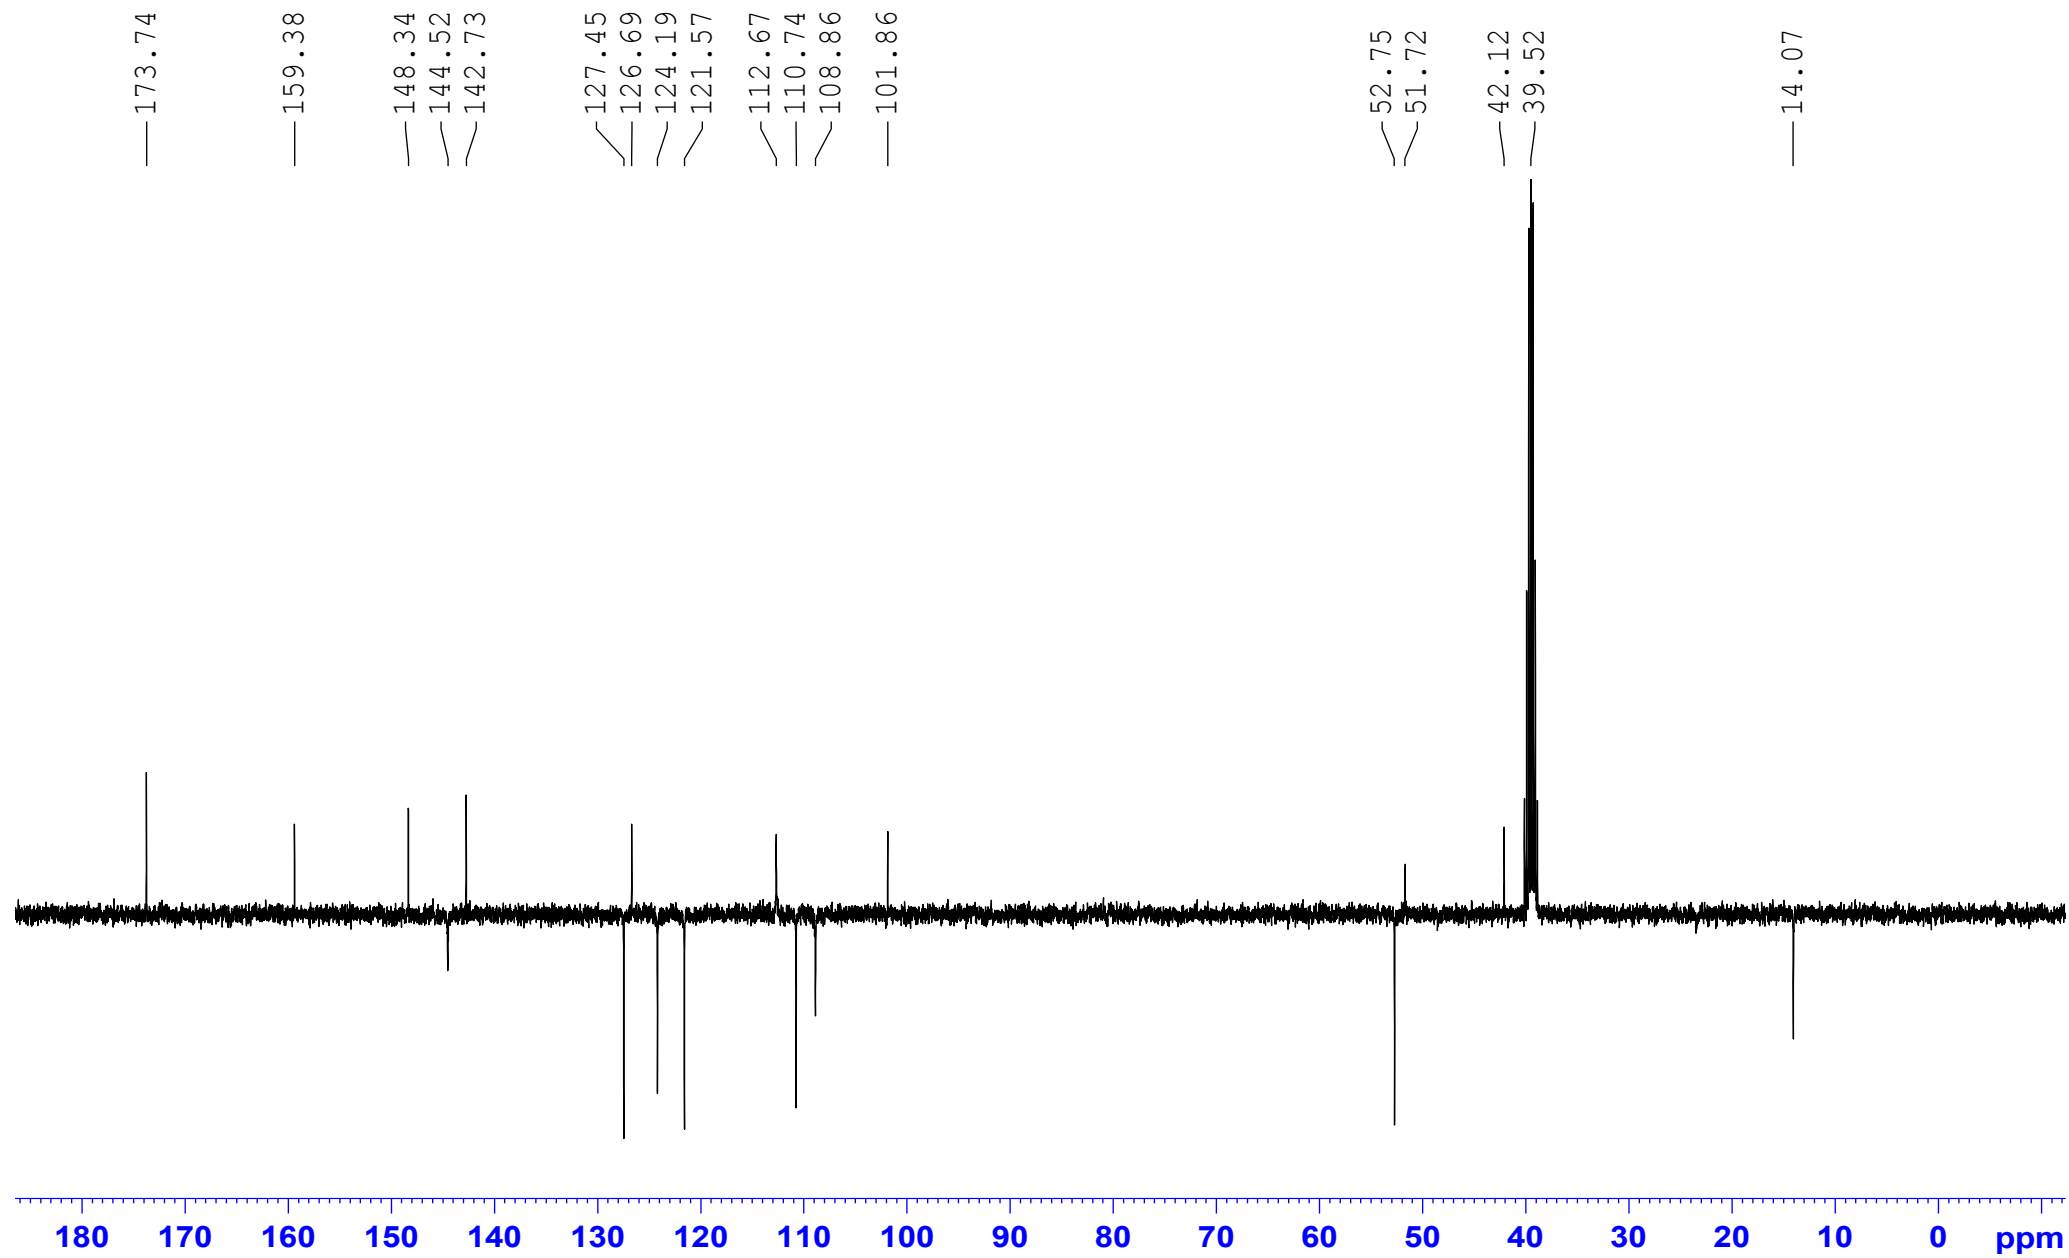

Figure S50 HSQC Spectrum of 6 in DMSO-*d*<sub>6</sub>

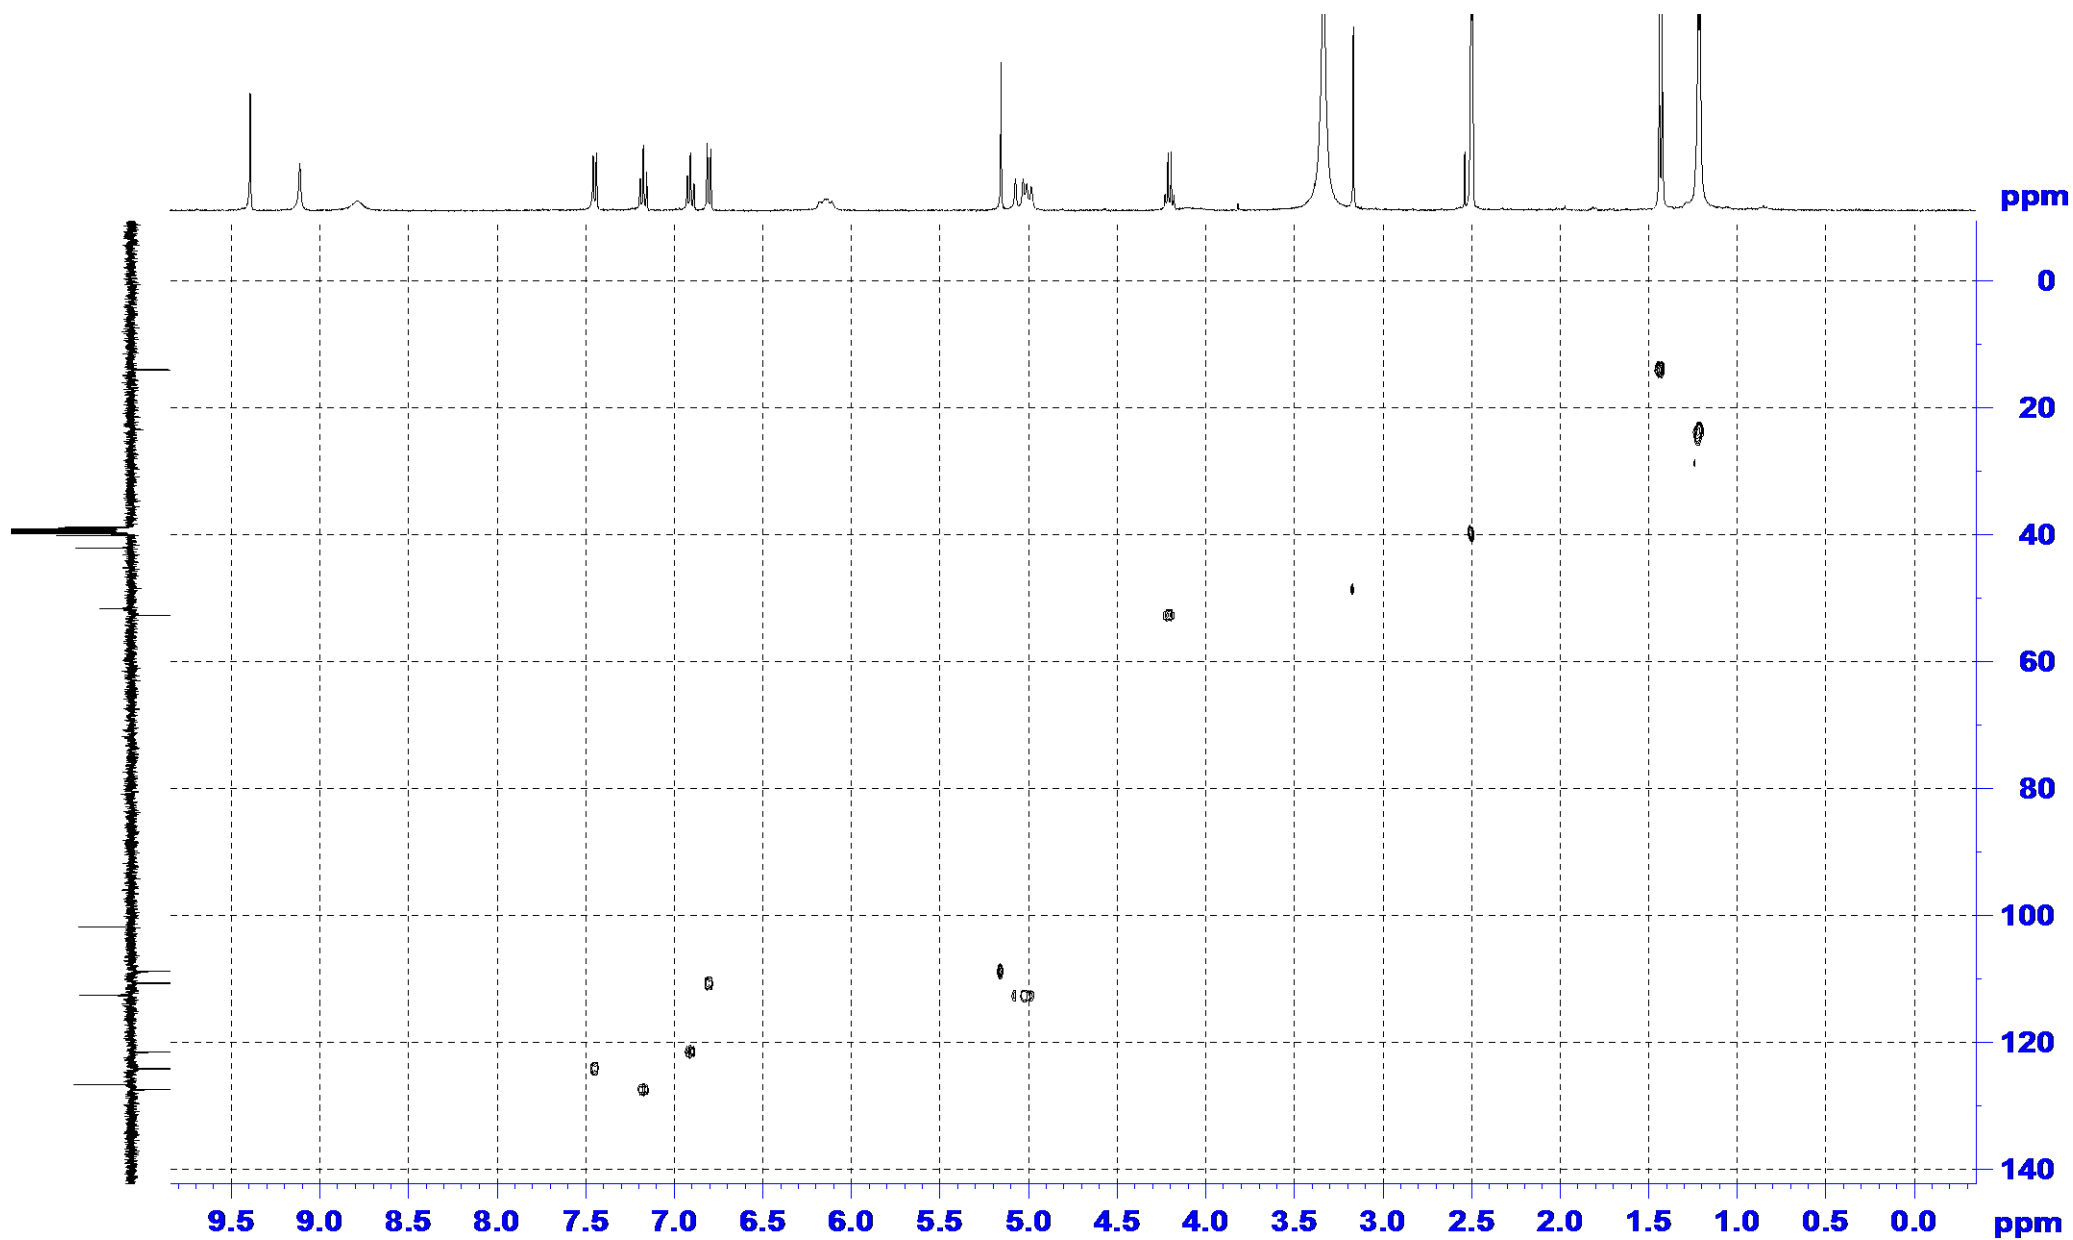

Figure S51  $^1\text{H}$ - $^1\text{H}$  COSY Spectrum of **6** in  $\text{DMSO-}d_6$

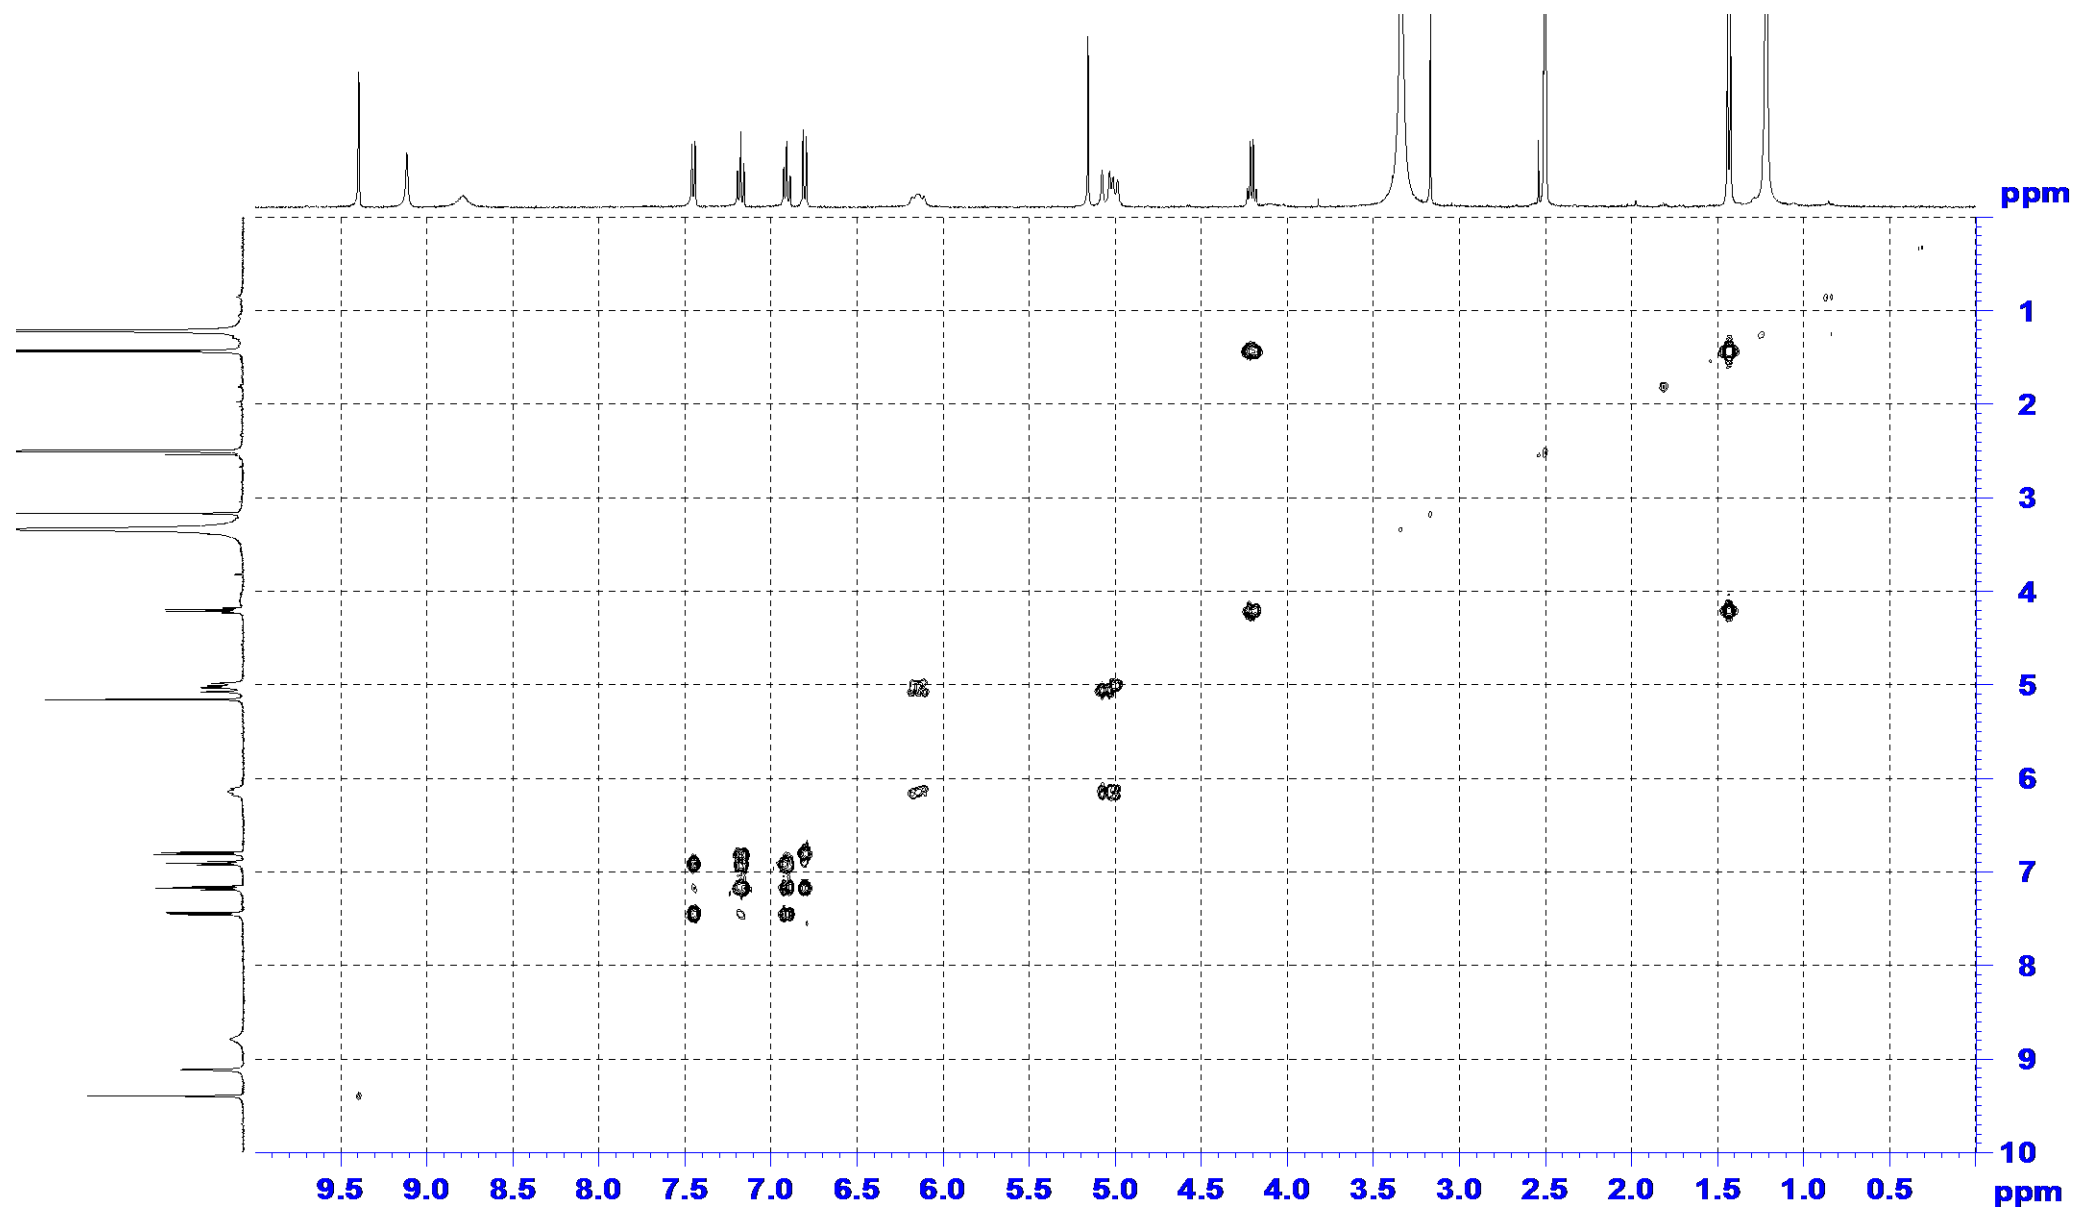

Figure S52 HMBC Spectrum of 6 in DMSO-*d*<sub>6</sub>

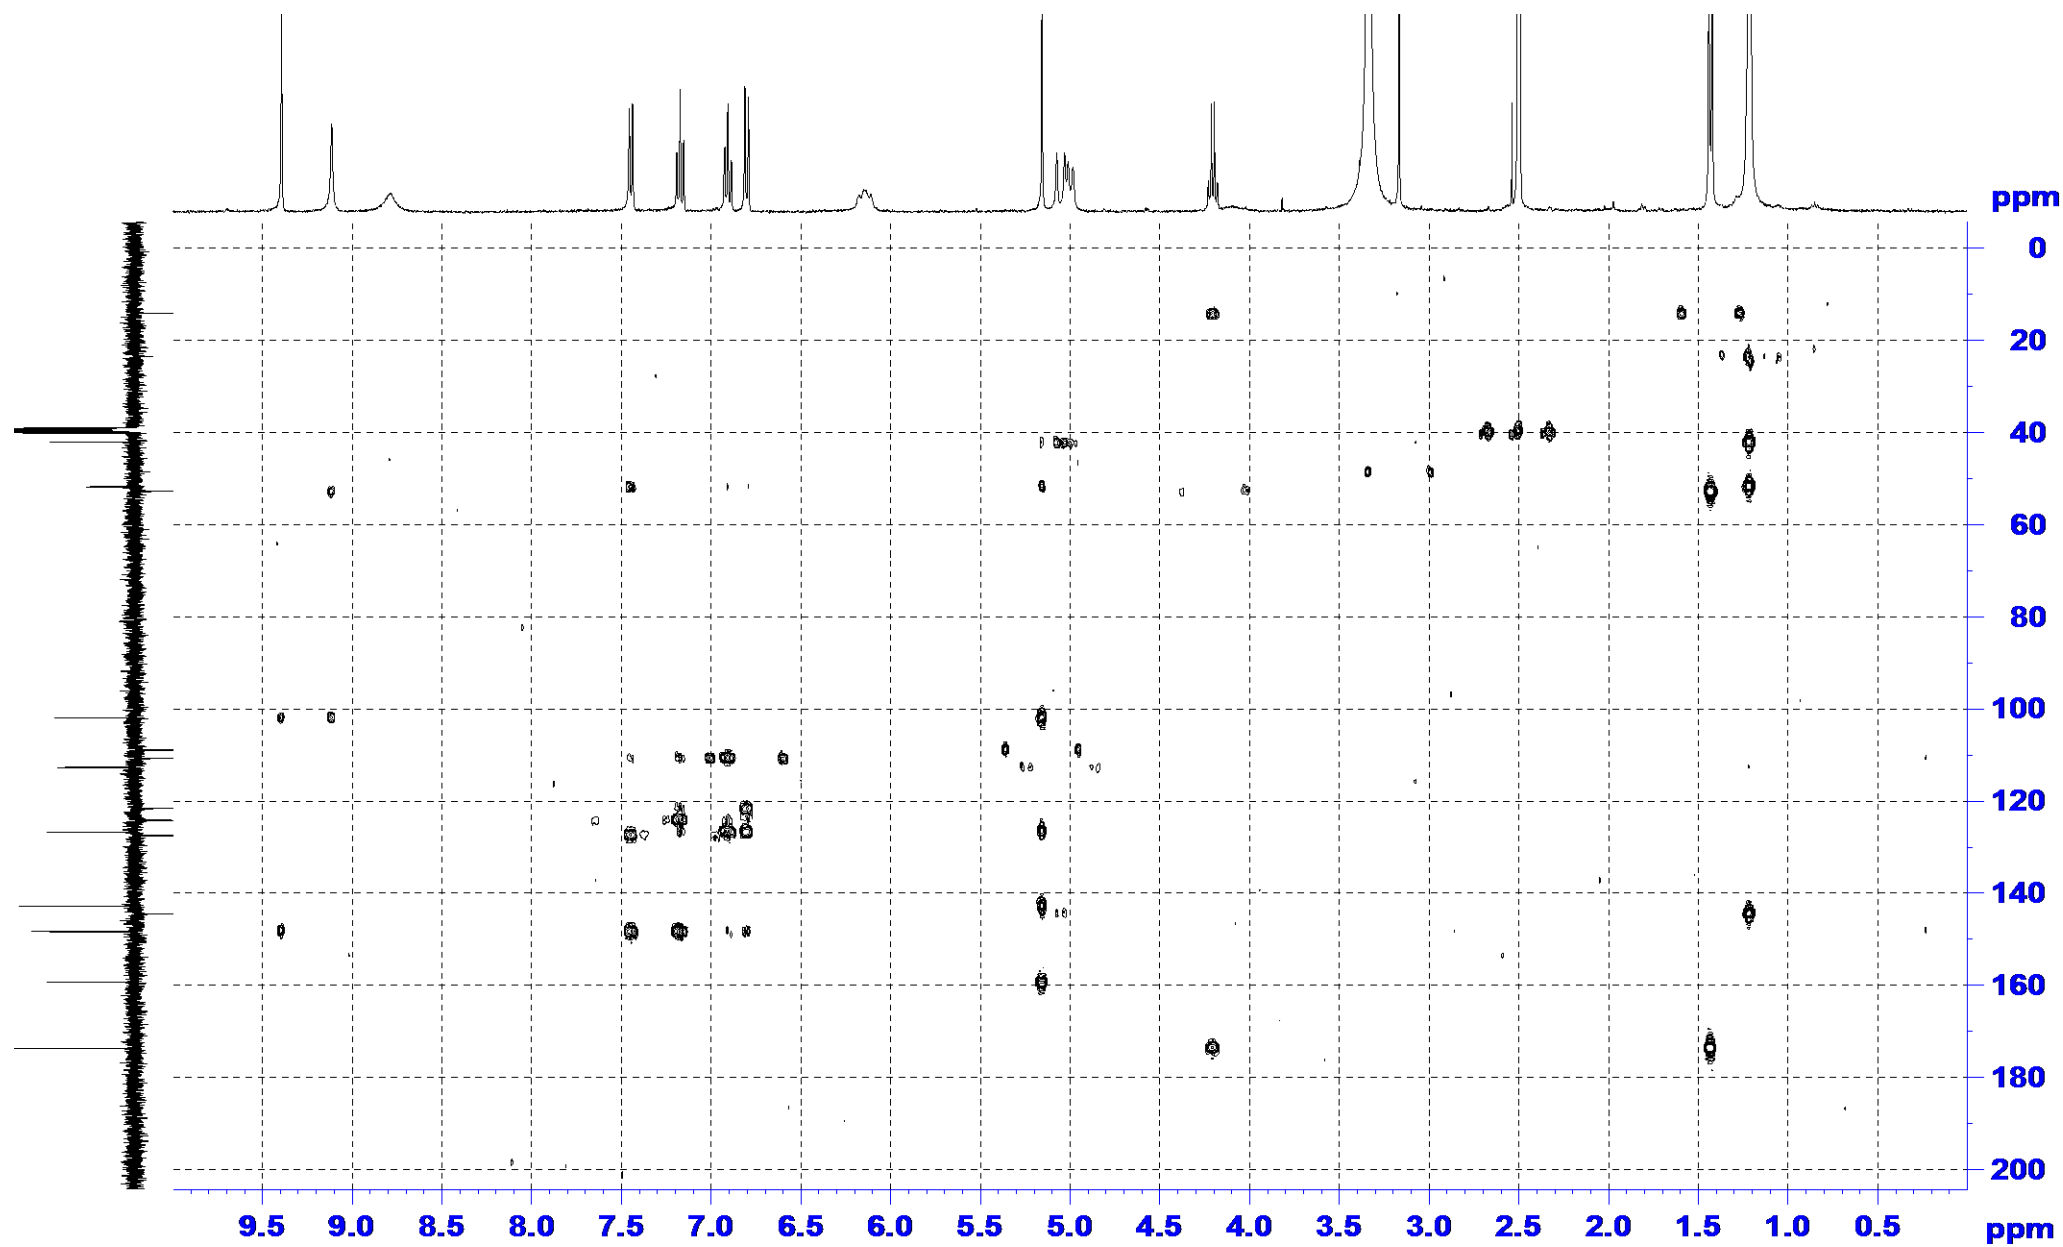

Figure S53 NOESY Spectrum of 6 in DMSO- $d_6$

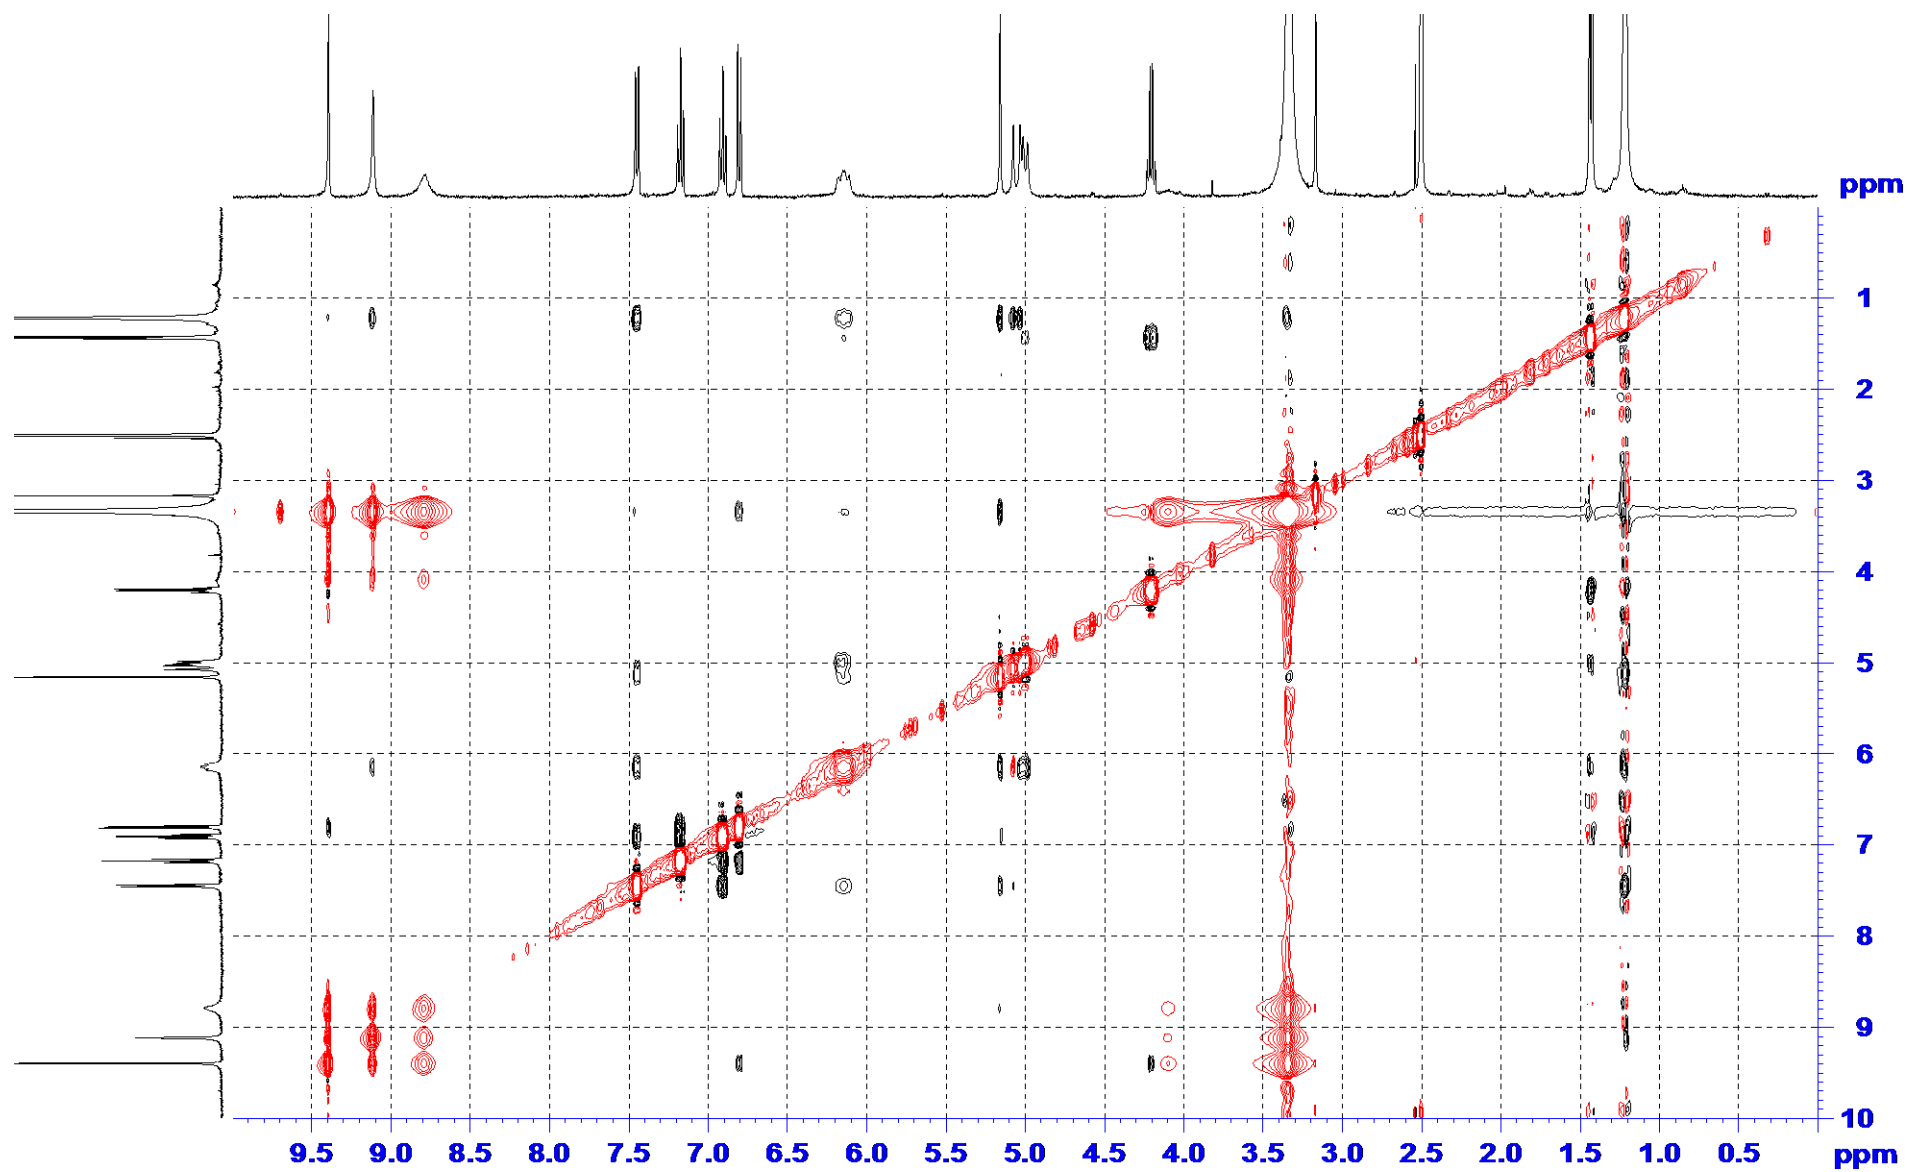

Figure S54 HRESIMS Data of 6

Xevo G2 Q-TOF/YCA166#

02-Dec-2016

Waters

LZD-14-1-57 12 (0.233) Cm (10:16-(2:9+21:54))

1: TOF MS ES+  
1.52e5

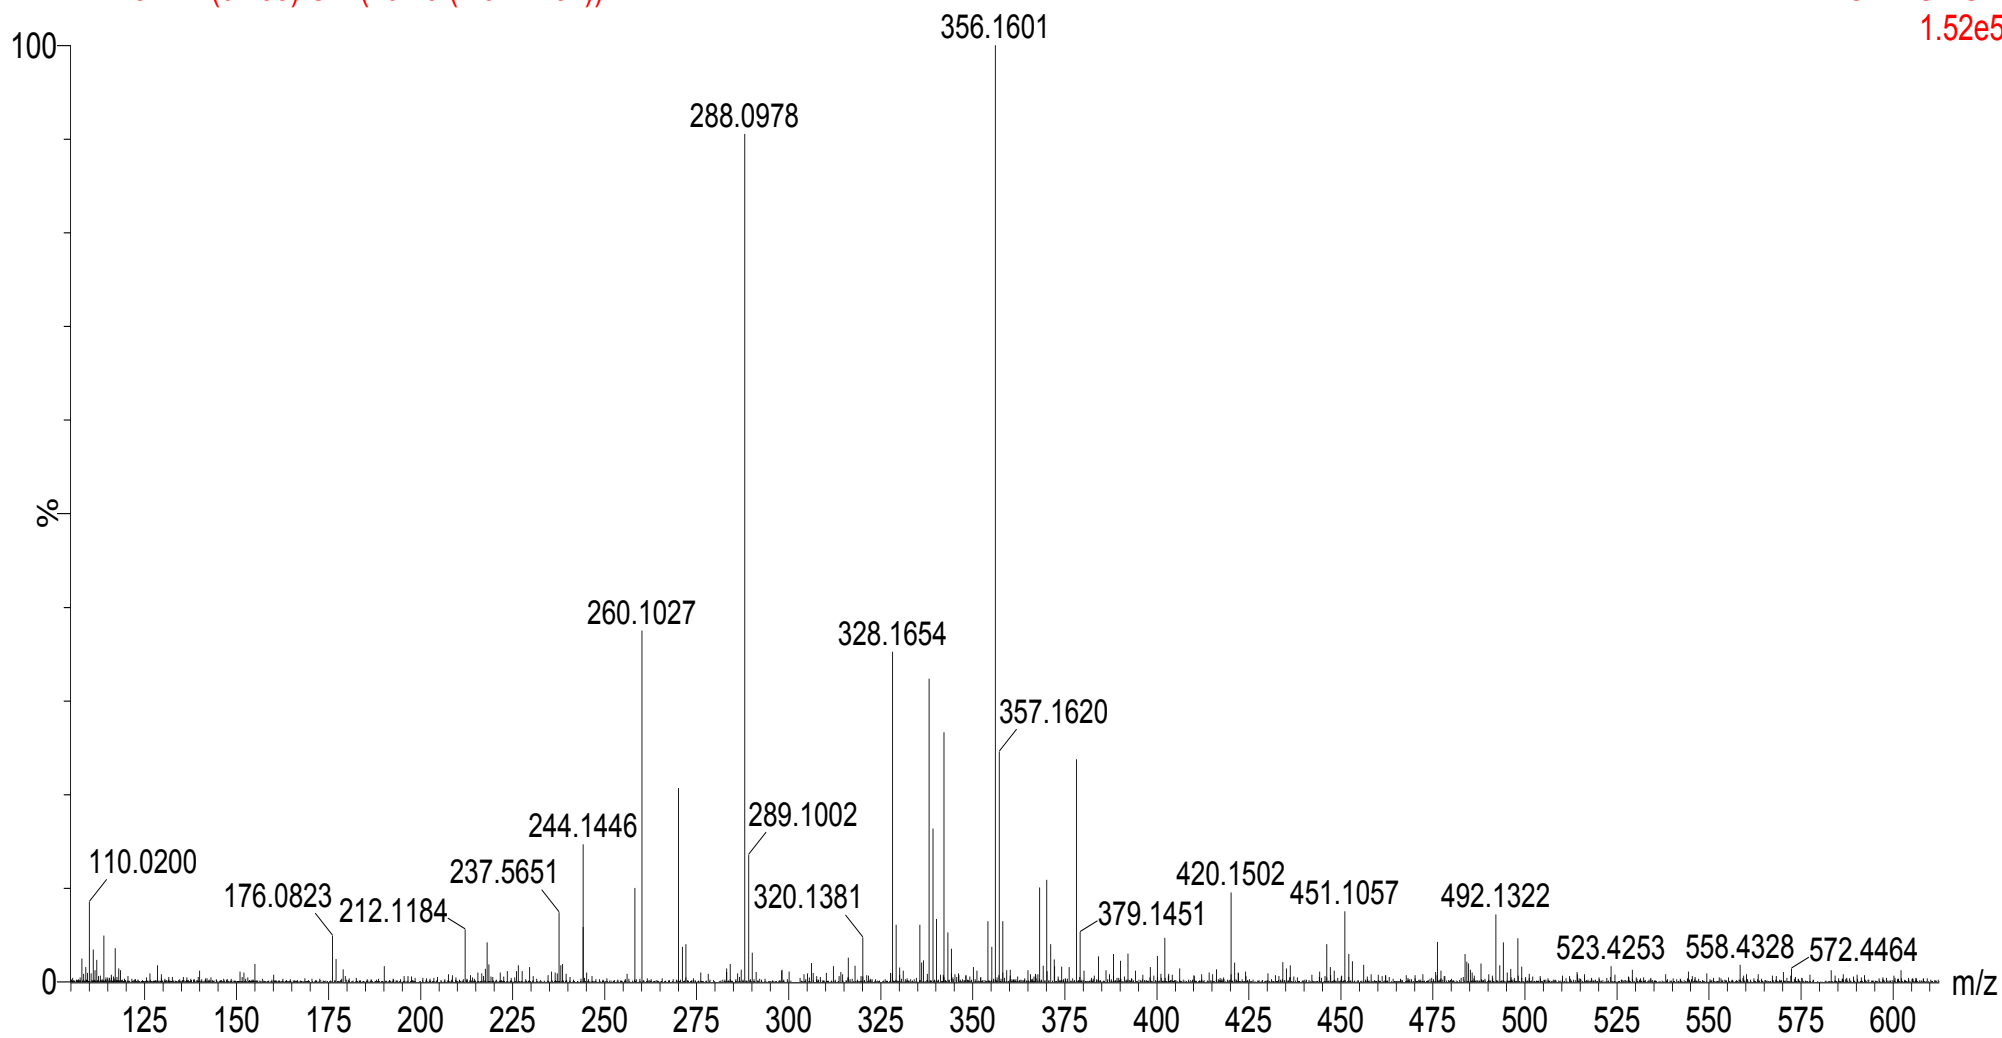



**Table S1. Crystal data and structure refinement for 1.**

| Identification code                         | 1                                                             |
|---------------------------------------------|---------------------------------------------------------------|
| Empirical formula                           | C <sub>23</sub> H <sub>19</sub> N <sub>5</sub> O <sub>4</sub> |
| Formula weight                              | 429.43                                                        |
| Temperature/K                               | 100                                                           |
| Crystal system                              | orthorhombic                                                  |
| Space group                                 | P2 <sub>1</sub> 2 <sub>1</sub> 2 <sub>1</sub>                 |
| a/Å                                         | 7.44940(7)                                                    |
| b/Å                                         | 13.81570(14)                                                  |
| c/Å                                         | 18.11204(16)                                                  |
| α/°                                         | 90                                                            |
| β/°                                         | 90                                                            |
| γ/°                                         | 90                                                            |
| Volume/Å <sup>3</sup>                       | 1864.07(3)                                                    |
| Z                                           | 4                                                             |
| ρ <sub>calc</sub> /g/cm <sup>3</sup>        | 1.530                                                         |
| μ/mm <sup>-1</sup>                          | 0.893                                                         |
| F(000)                                      | 896.0                                                         |
| Crystal size/mm <sup>3</sup>                | 0.58 × 0.5 × 0.3                                              |
| Radiation                                   | CuKα (λ = 1.54184)                                            |
| 2θ range for data collection/°              | 8.048 to 137.254                                              |
| Index ranges                                | -8 ≤ h ≤ 8, -16 ≤ k ≤ 15, -21 ≤ l ≤ 21                        |
| Reflections collected                       | 15719                                                         |
| Independent reflections                     | 3344 [R <sub>int</sub> = 0.0239, R <sub>sigma</sub> = 0.0129] |
| Data/restraints/parameters                  | 3344/0/292                                                    |
| Goodness-of-fit on F <sup>2</sup>           | 1.047                                                         |
| Final R indexes [I ≥ 2σ (I)]                | R <sub>1</sub> = 0.0245, wR <sub>2</sub> = 0.0623             |
| Final R indexes [all data]                  | R <sub>1</sub> = 0.0252, wR <sub>2</sub> = 0.0626             |
| Largest diff. peak/hole / e Å <sup>-3</sup> | 0.18/-0.13                                                    |
| Flack parameter                             | 0.07(5)                                                       |

**Table S2. Fractional Atomic Coordinates ( $\times 10^4$ ) and Equivalent Isotropic Displacement Parameters ( $\text{\AA}^2 \times 10^3$ ) for 1.  $U_{\text{eq}}$  is defined as 1/3 of the trace of the orthogonalised  $U_{\text{ij}}$  tensor.**

| Atom | <i>x</i>    | <i>y</i>   | <i>z</i>   | $U(\text{eq})$ |
|------|-------------|------------|------------|----------------|
| O3   | 8938.4(16)  | 4048.9(9)  | 5185.4(7)  | 17.4(3)        |
| O2   | 11408.7(17) | 5815.9(10) | 6345.5(7)  | 20.8(3)        |
| O1   | 6741.0(19)  | 7509.2(9)  | 5068.1(8)  | 23.9(3)        |
| O4   | 3493.1(18)  | 2783.7(9)  | 4116.4(8)  | 24.7(3)        |
| N13  | 8423(2)     | 5563.1(10) | 6161.3(8)  | 16.0(3)        |
| N2   | 5218(2)     | 6273.3(11) | 5610.2(9)  | 19.9(3)        |
| N25  | 5246(2)     | 4535.0(11) | 5297.3(8)  | 18.4(3)        |
| N18  | 5583(2)     | 4019.8(11) | 4116.7(8)  | 18.1(3)        |
| N5   | 6684(2)     | 4489.6(11) | 6887.6(8)  | 20.1(3)        |
| C12  | 10028(2)    | 5403.1(13) | 6534.8(10) | 17.1(4)        |
| C1   | 6726(2)     | 6719.9(13) | 5374.8(9)  | 17.4(4)        |
| C24  | 8559(3)     | 4251.0(12) | 3870.0(9)  | 17.3(4)        |
| C17  | 6186(2)     | 4767.2(12) | 4625.8(10) | 16.3(4)        |
| C27  | 4165(2)     | 3504.0(13) | 4387.2(10) | 18.8(4)        |
| C16  | 8259(2)     | 4687.3(12) | 4637.0(9)  | 15.8(4)        |
| C14  | 8491(2)     | 6188.1(12) | 5499.1(9)  | 15.9(4)        |
| C11  | 9878(3)     | 4717.3(13) | 7147.2(10) | 19.4(4)        |
| C19  | 6986(3)     | 3810.6(13) | 3620.4(10) | 18.3(4)        |
| C21  | 8533(3)     | 3145.9(14) | 2599.6(10) | 24.4(4)        |
| C15  | 9140(2)     | 5663.6(13) | 4787.7(9)  | 15.5(4)        |
| C20  | 6929(3)     | 3252.6(14) | 2984.3(10) | 21.7(4)        |
| C10  | 11378(3)    | 4493.9(14) | 7583.4(10) | 23.0(4)        |
| C23  | 10135(3)    | 4137.4(13) | 3476.6(10) | 20.1(4)        |
| C22  | 10110(3)    | 3583.2(14) | 2834.1(10) | 23.8(4)        |
| C9   | 11205(3)    | 3844.7(15) | 8160.4(10) | 27.3(5)        |
| C4   | 6867(2)     | 5095.4(13) | 6353.7(9)  | 17.2(4)        |
| C26  | 3590(2)     | 4013.5(13) | 5103(1)    | 19.5(4)        |
| C3   | 5238(2)     | 5271.0(13) | 5873.3(10) | 18.8(4)        |
| C28  | 3010(3)     | 3310.2(14) | 5692.3(11) | 25.1(4)        |
| C6   | 8215(3)     | 4279.5(13) | 7290.1(10) | 20.0(4)        |
| C7   | 8077(3)     | 3599.1(14) | 7867.4(10) | 25.2(4)        |
| C8   | 9562(3)     | 3390.4(14) | 8293.6(11) | 28.5(5)        |

**Table S3. Anisotropic Displacement Parameters ( $\text{\AA}^2 \times 10^3$ ) for 1. The Anisotropic displacement factor exponent takes the form:  $-2\pi^2[h^2a^{*2}U_{11}+2hka^*b^*U_{12}+\dots]$ .**

| Atom | $U_{11}$ | $U_{22}$ | $U_{33}$ | $U_{23}$ | $U_{13}$ | $U_{12}$ |
|------|----------|----------|----------|----------|----------|----------|
| O3   | 18.0(7)  | 15.8(6)  | 18.4(6)  | 3.7(5)   | -1.2(5)  | -0.5(5)  |
| O2   | 15.0(6)  | 24.7(7)  | 22.7(6)  | 1.1(5)   | -1.6(5)  | 0.8(5)   |
| O1   | 24.7(7)  | 16.2(6)  | 30.9(7)  | 2.0(5)   | -5.2(6)  | 3.3(5)   |
| O4   | 22.6(7)  | 17.2(6)  | 34.3(7)  | -2.0(6)  | -5.2(6)  | -3.1(6)  |
| N13  | 16.1(7)  | 16.2(7)  | 15.6(7)  | -0.1(6)  | 0.9(6)   | 1.8(6)   |
| N2   | 14.3(8)  | 19.5(8)  | 25.9(8)  | -3.5(7)  | -1.3(6)  | 3.6(6)   |
| N25  | 15.2(8)  | 19.8(8)  | 20.1(7)  | -0.8(6)  | 0.9(6)   | -2.7(6)  |
| N18  | 18.0(7)  | 16.4(8)  | 19.8(7)  | -1.2(6)  | -4.2(6)  | -0.7(6)  |
| N5   | 21.1(8)  | 20.8(8)  | 18.5(7)  | -1.7(6)  | 3.0(6)   | -1.3(7)  |
| C12  | 17.5(9)  | 17.6(8)  | 16.3(8)  | -4.6(7)  | 0.3(7)   | 3.6(7)   |
| C1   | 18.6(9)  | 16.5(9)  | 17.2(8)  | -3.8(7)  | -3.0(7)  | 2.1(7)   |
| C24  | 22.3(9)  | 12.8(8)  | 16.9(8)  | 1.7(7)   | -1.8(7)  | 1.5(7)   |
| C17  | 18.8(9)  | 13.1(8)  | 17.2(8)  | 0.0(7)   | -1.9(7)  | 0.0(7)   |
| C27  | 16.2(9)  | 15.4(9)  | 25.0(9)  | 2.7(7)   | -6.5(7)  | 1.5(7)   |
| C16  | 17.1(9)  | 14.4(8)  | 15.8(8)  | 1.9(7)   | -0.3(7)  | 0.8(7)   |
| C14  | 16.0(9)  | 14.8(8)  | 16.8(8)  | 0.2(7)   | -0.4(7)  | 0.4(7)   |
| C11  | 23.9(9)  | 18.3(9)  | 16.0(8)  | -3.2(7)  | 0.2(7)   | 4.3(8)   |
| C19  | 22.8(9)  | 15.1(8)  | 16.9(8)  | 3.7(7)   | -1.8(7)  | 0.6(7)   |
| C21  | 37.8(11) | 18.3(9)  | 16.9(9)  | 0.0(7)   | 0.0(8)   | 3.6(9)   |
| C15  | 15.7(9)  | 15.7(9)  | 15.1(8)  | 1.1(7)   | -0.4(6)  | -0.2(7)  |
| C20  | 28.4(10) | 17.1(9)  | 19.6(9)  | 0.9(7)   | -6.3(8)  | -0.3(8)  |
| C10  | 28.9(10) | 21.7(9)  | 18.5(9)  | -3.8(7)  | -2.3(8)  | 6.2(8)   |
| C23  | 23.4(9)  | 18.4(9)  | 18.6(8)  | 2.5(7)   | -0.1(7)  | 0.5(8)   |
| C22  | 29.4(10) | 22.4(10) | 19.7(9)  | 1.8(8)   | 4.0(8)   | 3.5(8)   |
| C9   | 38.7(12) | 25.1(10) | 18.0(9)  | -3.7(8)  | -4.7(9)  | 12.6(9)  |
| C4   | 16.5(9)  | 16.9(8)  | 18.2(9)  | -4.1(7)  | 3.0(7)   | -0.1(7)  |
| C26  | 14.5(9)  | 17.3(9)  | 26.7(9)  | 1.0(7)   | -3.2(7)  | -0.5(7)  |
| C3   | 14.7(9)  | 20.1(9)  | 21.5(9)  | -1.2(7)  | 2.1(7)   | -0.5(7)  |
| C28  | 22.9(10) | 21.7(9)  | 30.7(10) | 1.7(8)   | 2.4(8)   | -3.1(8)  |
| C6   | 26.8(10) | 17.8(9)  | 15.5(8)  | -4.4(7)  | 2.1(7)   | 1.9(8)   |
| C7   | 36.6(11) | 19.7(9)  | 19.5(9)  | -2.0(7)  | 5.9(8)   | 0.2(8)   |
| C8   | 50.3(13) | 18.5(10) | 16.6(9)  | 1.1(8)   | 2.4(9)   | 8.9(9)   |

**Table S4. Bond Lengths for 1.**

| <b>Atom</b> | <b>Atom</b> | <b>Length/Å</b> | <b>Atom</b> | <b>Atom</b> | <b>Length/Å</b> |
|-------------|-------------|-----------------|-------------|-------------|-----------------|
| O3          | C16         | 1.422(2)        | C24         | C16         | 1.531(2)        |
| O2          | C12         | 1.225(2)        | C24         | C19         | 1.396(3)        |
| O1          | C1          | 1.224(2)        | C24         | C23         | 1.382(3)        |
| O4          | C27         | 1.217(2)        | C17         | C16         | 1.548(2)        |
| N13         | C12         | 1.391(2)        | C27         | C26         | 1.536(3)        |
| N13         | C14         | 1.479(2)        | C16         | C15         | 1.525(2)        |
| N13         | C4          | 1.372(2)        | C14         | C15         | 1.555(2)        |
| N2          | C1          | 1.351(2)        | C11         | C10         | 1.403(3)        |
| N2          | C3          | 1.465(3)        | C11         | C6          | 1.402(3)        |
| N25         | C17         | 1.440(2)        | C19         | C20         | 1.387(3)        |
| N25         | C26         | 1.471(2)        | C21         | C20         | 1.391(3)        |
| N25         | C3          | 1.457(2)        | C21         | C22         | 1.388(3)        |
| N18         | C17         | 1.455(2)        | C10         | C9          | 1.383(3)        |
| N18         | C27         | 1.365(2)        | C23         | C22         | 1.393(3)        |
| N18         | C19         | 1.408(2)        | C9          | C8          | 1.397(3)        |
| N5          | C4          | 1.286(2)        | C4          | C3          | 1.513(2)        |
| N5          | C6          | 1.384(3)        | C26         | C28         | 1.507(3)        |
| C12         | C11         | 1.463(3)        | C6          | C7          | 1.410(3)        |
| C1          | C14         | 1.523(2)        | C7          | C8          | 1.379(3)        |

**Table S5 Bond Angles for 1.**

| Atom | Atom | Atom | Angle/°    | Atom | Atom | Atom | Angle/°    |
|------|------|------|------------|------|------|------|------------|
| C12  | N13  | C14  | 117.24(15) | C15  | C16  | C17  | 111.64(14) |
| C4   | N13  | C12  | 121.85(14) | N13  | C14  | C1   | 111.84(14) |
| C4   | N13  | C14  | 120.65(14) | N13  | C14  | C15  | 114.24(13) |
| C1   | N2   | C3   | 121.74(15) | C1   | C14  | C15  | 111.75(14) |
| C17  | N25  | C26  | 108.35(14) | C10  | C11  | C12  | 120.56(18) |
| C17  | N25  | C3   | 116.84(14) | C6   | C11  | C12  | 119.12(17) |
| C3   | N25  | C26  | 120.65(14) | C6   | C11  | C10  | 120.32(17) |
| C27  | N18  | C17  | 112.43(15) | C24  | C19  | N18  | 109.08(15) |
| C27  | N18  | C19  | 134.11(15) | C20  | C19  | N18  | 128.43(17) |
| C19  | N18  | C17  | 108.74(14) | C20  | C19  | C24  | 122.49(18) |
| C4   | N5   | C6   | 116.44(16) | C22  | C21  | C20  | 121.87(17) |
| O2   | C12  | N13  | 120.76(16) | C16  | C15  | C14  | 115.27(14) |
| O2   | C12  | C11  | 125.29(17) | C19  | C20  | C21  | 116.65(18) |
| N13  | C12  | C11  | 113.94(16) | C9   | C10  | C11  | 119.6(2)   |
| O1   | C1   | N2   | 123.92(17) | C24  | C23  | C22  | 118.80(18) |
| O1   | C1   | C14  | 119.26(16) | C21  | C22  | C23  | 120.41(18) |
| N2   | C1   | C14  | 116.81(15) | C10  | C9   | C8   | 120.22(19) |
| C19  | C24  | C16  | 110.05(16) | N13  | C4   | C3   | 117.14(15) |
| C23  | C24  | C16  | 129.55(17) | N5   | C4   | N13  | 125.92(17) |
| C23  | C24  | C19  | 119.78(16) | N5   | C4   | C3   | 116.87(17) |
| N25  | C17  | N18  | 103.14(14) | N25  | C26  | C27  | 101.09(14) |
| N25  | C17  | C16  | 117.26(15) | N25  | C26  | C28  | 112.74(15) |
| N18  | C17  | C16  | 105.39(14) | C28  | C26  | C27  | 112.47(15) |
| O4   | C27  | N18  | 126.90(18) | N2   | C3   | C4   | 110.30(15) |
| O4   | C27  | C26  | 126.86(18) | N25  | C3   | N2   | 115.29(15) |
| N18  | C27  | C26  | 106.23(15) | N25  | C3   | C4   | 107.26(14) |
| O3   | C16  | C24  | 109.73(13) | N5   | C6   | C11  | 122.69(16) |
| O3   | C16  | C17  | 114.12(14) | N5   | C6   | C7   | 118.07(18) |
| O3   | C16  | C15  | 105.70(14) | C11  | C6   | C7   | 119.25(18) |
| C24  | C16  | C17  | 99.32(14)  | C8   | C7   | C6   | 119.75(19) |
| C15  | C16  | C24  | 116.61(15) | C7   | C8   | C9   | 120.81(18) |

**Table S6 Hydrogen Atom Coordinates ( $\text{\AA}\times 10^4$ ) and Isotropic Displacement Parameters ( $\text{\AA}^2\times 10^3$ ) for 1.**

| <b>Atom</b> | <b><i>x</i></b> | <b><i>y</i></b> | <b><i>z</i></b> | <b>U(eq)</b> |
|-------------|-----------------|-----------------|-----------------|--------------|
| H3          | 8243.32         | 3573.78         | 5230.55         | 26           |
| H2          | 4196.06         | 6593.12         | 5605.5          | 24           |
| H17         | 5813.14         | 5420.13         | 4443.32         | 20           |
| H14         | 9406.83         | 6698.43         | 5606.32         | 19           |
| H21         | 8549.27         | 2762.88         | 2164.08         | 29           |
| H15A        | 8914.07         | 6092.75         | 4359.95         | 19           |
| H15B        | 10453.44        | 5565.92         | 4823.36         | 19           |
| H20         | 5848.44         | 2957.92         | 2819.57         | 26           |
| H10         | 12505.74        | 4786.69         | 7482.92         | 28           |
| H23         | 11215.58        | 4431.88         | 3641.41         | 24           |
| H22         | 11179.54        | 3504.24         | 2554.71         | 29           |
| H9          | 12208.04        | 3707.4          | 8467.15         | 33           |
| H26         | 2602.78         | 4484.45         | 4998.32         | 23           |
| H3A         | 4143.91         | 5169.1          | 6183.7          | 23           |
| H28A        | 4003.96         | 2869.94         | 5806.42         | 38           |
| H28B        | 1979.25         | 2935.82         | 5515.39         | 38           |
| H28C        | 2671.34         | 3667.37         | 6138.52         | 38           |
| H7          | 6966.19         | 3285.49         | 7962.42         | 30           |
| H8          | 9465.47         | 2932            | 8682.55         | 34           |

## Computational Details.

In general, conformational analyses were carried out via random searching in the Sybyl-X 2.0 using the MMFF94S force field with an energy cutoff of 2.5 kcal/mol.<sup>1</sup> The results showed one lowest energy conformer for 3*R*, 14*R*, 16*R*, 17*R*, 26*S*, 28*S*-**3** and two for 3*R*, 14*R*, 16*R*, 17*R*, 26*S*, 28*S*-**4**, one for 14*S*, 16*S*, and 17*R*-**5**.

**ECD calculation:** Subsequently, the conformers were re-optimized using DFT at the b3lyp/6-31+g(d) level in gas phase by the GAUSSIAN 09 program.<sup>2</sup> The energies, oscillator strengths, and rotational strengths (velocity) of the first 60 electronic excitations were calculated using the TDDFT methodology at the b3lyp/6-311++g(d,p) level in vacuum. The ECD spectra were simulated by the overlapping Gaussian function (half the bandwidth at 1/e peak height,  $\sigma = 0.25$  for **3** and **5**, 0.3 for **4**).<sup>3</sup> To get the final spectra, the simulated spectra of the conformers were averaged according to the Boltzmann distribution theory and their relative Gibbs free energy ( $\Delta G$ ). Theoretical ECD spectrum of the corresponding enantiomer was obtained by directly inverse of the ECD spectrum of the calculated model molecule, respectively. By comparing the experiment spectrum with the calculated ECD spectra, the absolute configuration of **3–5** was resolved.

**<sup>13</sup>C NMR calculation:** The conformers were re-optimized using DFT at the B3LYP/6-31G\* level in gas phase by the GAUSSIAN 09 program. The <sup>13</sup>C NMR shielding constants of **1** and **5** were calculated with the GIAO method at MPW1PW91/6-31G(d,p) level in gas phase. The computational <sup>13</sup>C NMR were finally obtained by linear regression analysis method<sup>4</sup>

1. Sybyl Software, version X 2.0; Tripos Associates Inc.: St. Louis, MO, 2013.

2. Frisch, M. J.; Trucks, G. W.; Schlegel, H. B.; Scuseria, G. E.; Robb, M. A.; Cheeseman, J. R.; Scalmani, G.; Barone, V.; Mennucci, B.; Petersson, G. A.; Nakatsuji, H.; Caricato, M.; Li, X.; Hratchian, H. P.; Izmaylov, A. F.; Bloino, J.; Zheng, G.; Sonnenberg, J. L.; Hada, M.; Ehara, M.; Toyota, K.; Fukuda, R.; Hasegawa, J.; Ishida, M.; Nakajima, T.; Honda, Y.; Kitao, O.; Nakai, H.; Vreven, T.; Montgomery, Jr., J. A.; Peralta, J. E.; Ogliaro, F.; Bearpark, M.; Heyd, J. J.; Brothers, E.; Kudin, K. N.; Staroverov, V. N.; Kobayashi, R.; Normand, J.; Raghavachari, K.; Rendell, A.; Burant, J. C.; Iyengar, S. S.; Tomasi, J.; Cossi, M.; Rega, N.; Millam, J. M.; Klene, M.; Knox, J. E.; Cross, J. B.; Bakken, V.; Adamo, C.; Jaramillo, J.; Gomperts, R.; Stratmann, R. E.; Yazyev, O.; Austin, A. J.; Cammi, R.; Pomelli, C.; Ochterski, J. W.; Martin, R. L.; Morokuma, K.; Zakrzewski, V. G.; Voth, G. A.; Salvador, P.; Dannenberg, J. J.; Dapprich, S.; Daniels, A. D.; Farkas, Ö.; Foresman, J. B.; Ortiz, J. V.; Cioslowski, J.; Fox, D. J. Gaussian 09, Rev. C 01; Gaussian, Inc., Wallingford CT, 2009.

3. Stephens, P. J.; Harada, N. ECD cotton effect approximated by the Gaussian curve and other methods. *Chirality* **2010**, *22*, 229–233.

4. Lodewyk MW, Siebert MR, Tantillo DJ. Computational prediction of  $^1\text{H}$  and  $^{13}\text{C}$  chemical shifts: a useful tool for natural product, mechanistic, and synthetic organic chemistry. *Chem Rev* 2012;112:1839-1862.

1. The optimized conformers of 3*R*, 14*R*, 16*R*, 17*R*, 26*S*, 28*S*-3.

C1

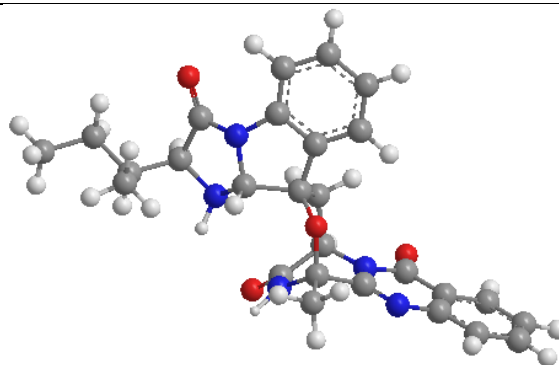

E(RB3LYP) -1620.32031938

2. The optimized conformers of 3*R*, 14*R*, 16*R*, 17*R*, 26*S*, 28*S*-4.

C1

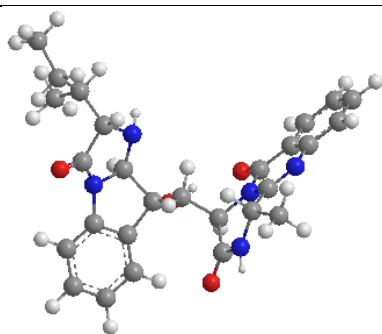

C2

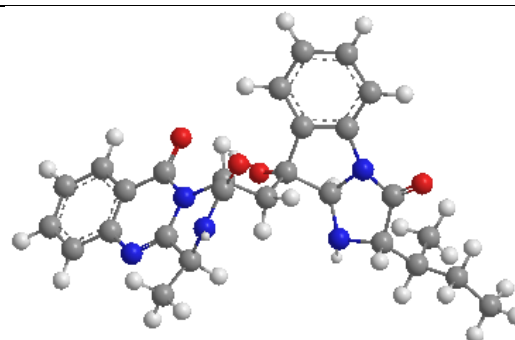

3. B3LYP-calculated relative energies (Kcal/mol) and conformational population (%) for the most stable conformers of 3*R*, 14*R*, 16*R*, 17*R*, 26*S*, 28*S*-4

| Comound | conformer | $\Delta E$ (kcal/mol) <sup>a</sup> | Population (%) |
|---------|-----------|------------------------------------|----------------|
| 4       | C1        | 0                                  | 94.16          |
|         | C2        | 0.002624                           | 5.84           |

<sup>a</sup>Relative to conformer C1 with E6-31+G(d) = -1621.545237 Kcal/mol. <sup>b</sup>Calculated using free energy values from Gaussian 03W according to  $\Delta G = -RT \ln K$ .

4. The optimized conformers of 3*R*, 14*R*, 16*R*, 17*R*, 26*S*, 28*S*-5.

C1



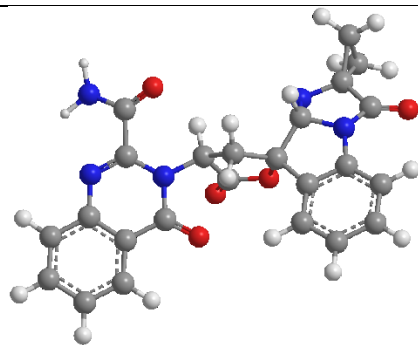

E(RB3LYP) -1575.6229694

---
